# Supplementary material for: H-Rubies, a new family of red emitting fluorescent pH sensors for living cells
Source: PubMed Central journal article supplement (PMC5950754; doi:10.1039/c5sc01113b), 2015-07-14
Supplement: SC-006-C5SC01113B-s002.pdf [file SC-006-C5SC01113B-s002.pdf]

## **H-Rubies, a New Family of Red Emitting Fluorescent pH sensors for Living Cells**

Guillaume Despras<sup>+</sup>, Alsu Zamaleeva<sup>+</sup>, Lucie Dardevet, Céline Tisseyre, Joao Gamelas Magalhaes, Charlotte Garner, Michel De Waard, Sebastian Amigorena, Anne Feltz, Jean-Maurice Mallet, Mayeul Collot\*

### **Supplementary information**

**Spectral and physico-chemical properties, absorption and emission spectra at different pH, pKa titration curves and metal sensitivities of H-Rubies**

## Imidazole

| State            | $\lambda_{\text{abs}}$ (nm) | $\lambda_{\text{em}}$ (nm) | pK <sub>a</sub>  | $\epsilon$<br>(M <sup>-1</sup> cm <sup>-1</sup> ) | $\Phi$           | $\Phi_{\text{ON}}/\Phi_{\text{OFF}}$ | Dynamic Intensity |
|------------------|-----------------------------|----------------------------|------------------|---------------------------------------------------|------------------|--------------------------------------|-------------------|
| ON <sup>a</sup>  | 583                         | 609                        | N/A <sup>c</sup> | 63403                                             | 0.40             | N/A <sup>c</sup>                     | N/A <sup>c</sup>  |
| OFF <sup>b</sup> | 584                         | 608                        |                  | N/A <sup>c</sup>                                  | N/A <sup>c</sup> |                                      |                   |

<sup>a</sup> Protonated form: pH 4  
<sup>b</sup> Deprotonated form: pH 10  
<sup>c</sup> Not found to be a pH probe

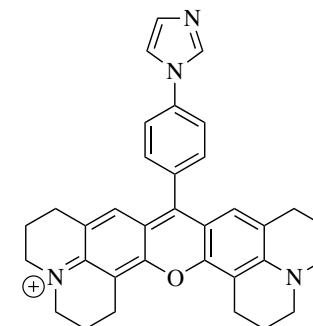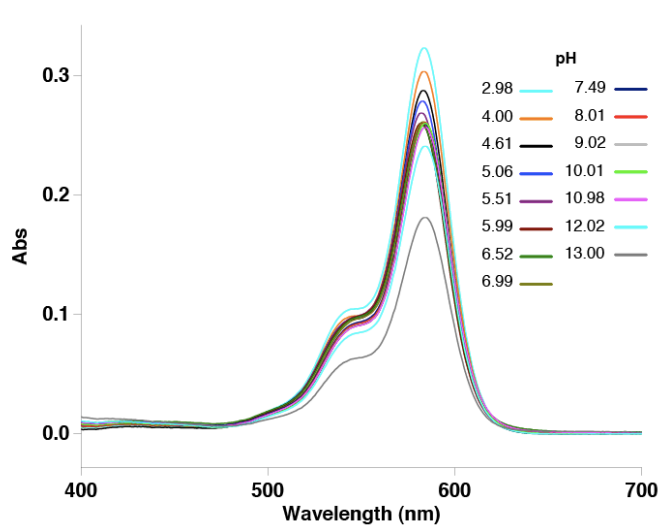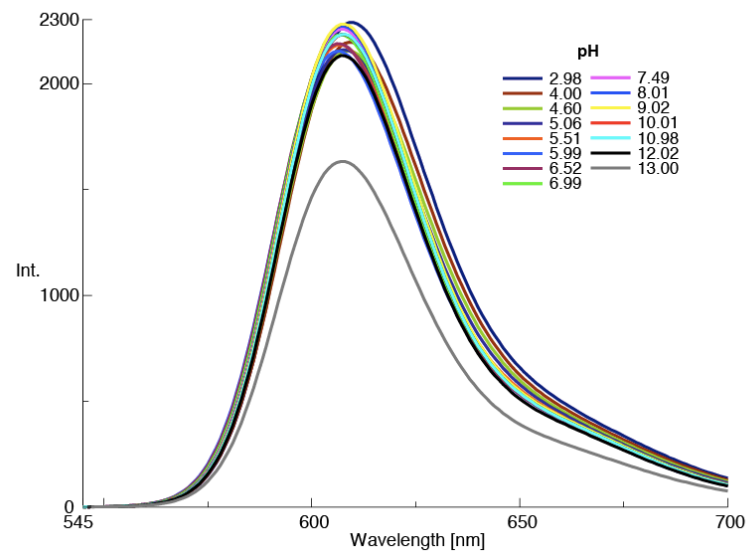

Left: Dependence of absorption on pH in a MOPS buffered aqueous solution. Right: Dependence of fluorescence intensity on pH in a MOPS buffered aqueous solution. Excitation at 535 nm.

## HR-mOH

| State            | $\lambda_{\text{abs}}$ (nm) | $\lambda_{\text{em}}$ (nm) | pK <sub>a</sub> | $\epsilon$<br>(M <sup>-1</sup> cm <sup>-1</sup> ) | $\Phi$ | $\Phi_{\text{ON}}/\Phi_{\text{OFF}}$ | Dynamic Intensity |
|------------------|-----------------------------|----------------------------|-----------------|---------------------------------------------------|--------|--------------------------------------|-------------------|
| ON <sup>a</sup>  | 578                         | 602                        | 9.33 ± 0.13     | 50279                                             | 0.30   | 3                                    | 132               |
| OFF <sup>b</sup> | 577                         | 603                        |                 | 43040                                             | 0.11   |                                      |                   |

<sup>a</sup> Protonated form: pH 4

<sup>b</sup> Deprotonated form: pH 10

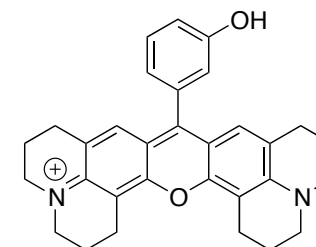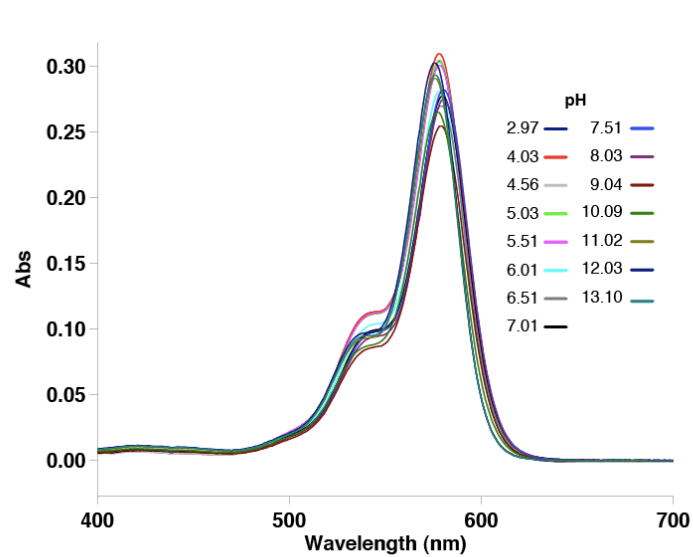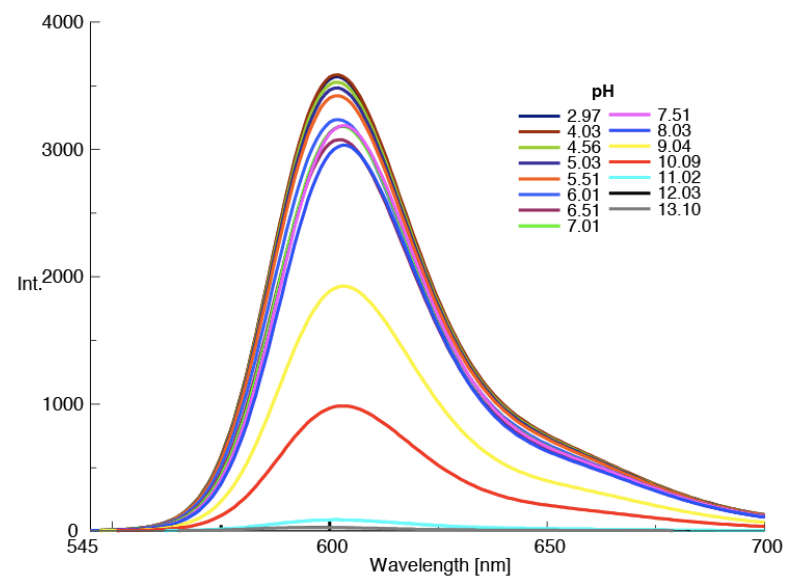

Left: Dependence of absorption on pH in a MOPS buffered aqueous solution. Right: Dependence of fluorescence intensity on pH in a MOPS buffered aqueous solution. Excitation at 535 nm.

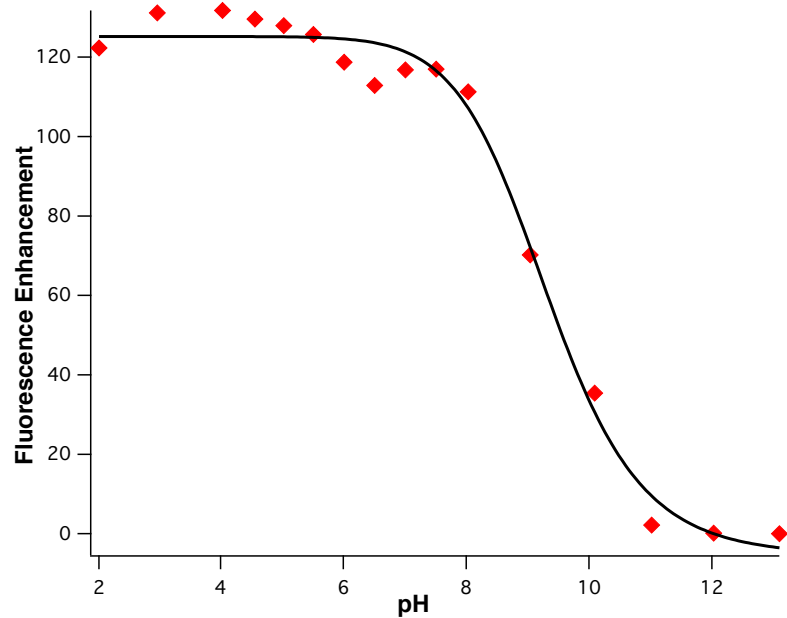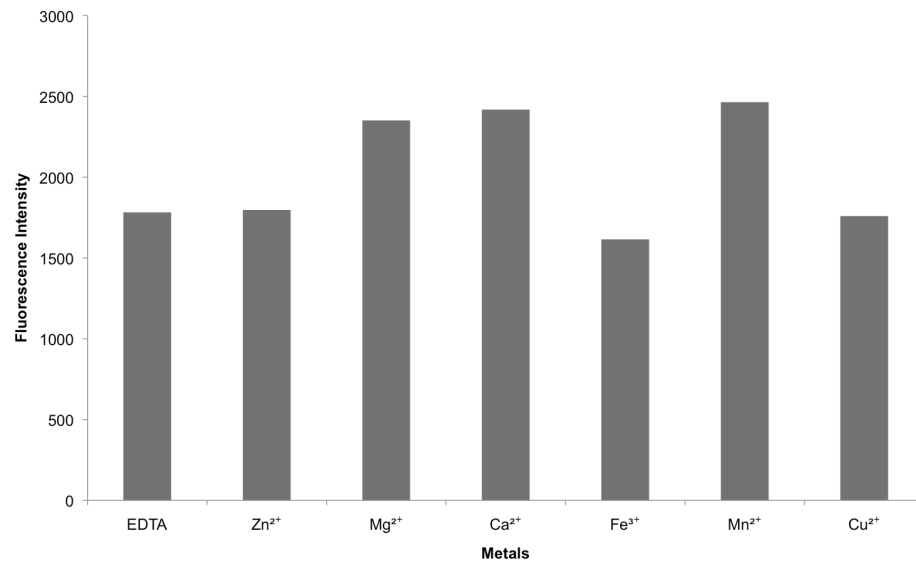

Left: Dependence of fluorescence enhancement on pH. Curve fitting was based on a modified Hill equation from which pK<sub>a</sub> values were calculated. Right: Fluorescence intensities of the probe (5 μM) to a range of metal ions in a MOPS buffer (MOPS 30 mM, KCl 100 mM, pH 7.2). The concentration of cations is 10<sup>-3</sup> M.

## HR-Cl

| State            | $\lambda_{\text{abs}}$ (nm) | $\lambda_{\text{em}}$ (nm) | pK <sub>a</sub> | $\epsilon$<br>(M <sup>-1</sup> cm <sup>-1</sup> ) | $\Phi$ | $\Phi_{\text{ON}}/\Phi_{\text{OFF}}$ | Dynamic Intensity |
|------------------|-----------------------------|----------------------------|-----------------|---------------------------------------------------|--------|--------------------------------------|-------------------|
| ON <sup>a</sup>  | 579                         | 601                        | 6.17 ± 0.10     | 48432                                             | 0.47   | -                                    | 753               |
| OFF <sup>b</sup> | 544                         | 599                        |                 | N/A <sup>c</sup>                                  |        |                                      |                   |

<sup>a</sup> Protonated form: pH 4      <sup>c</sup> Non-fluorescent  
<sup>b</sup> Deprotonated form: pH 10

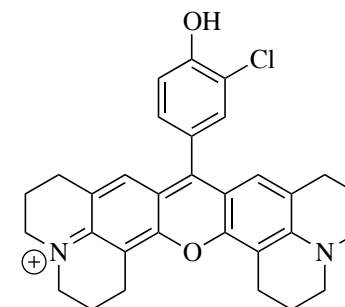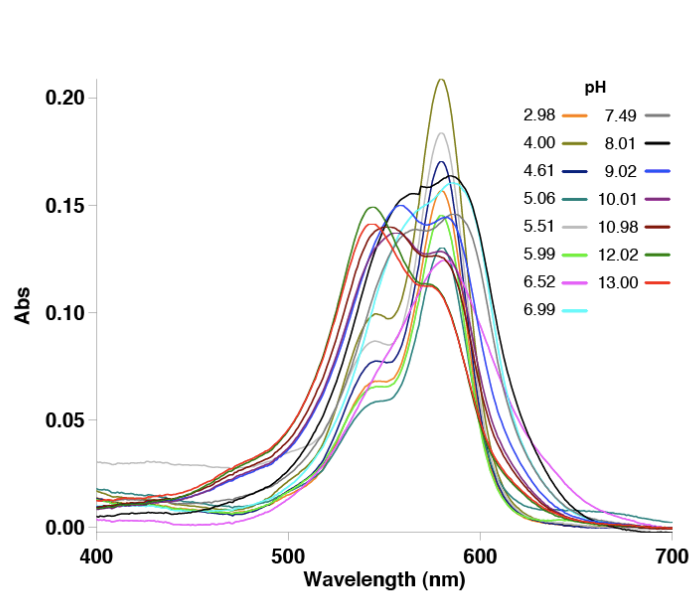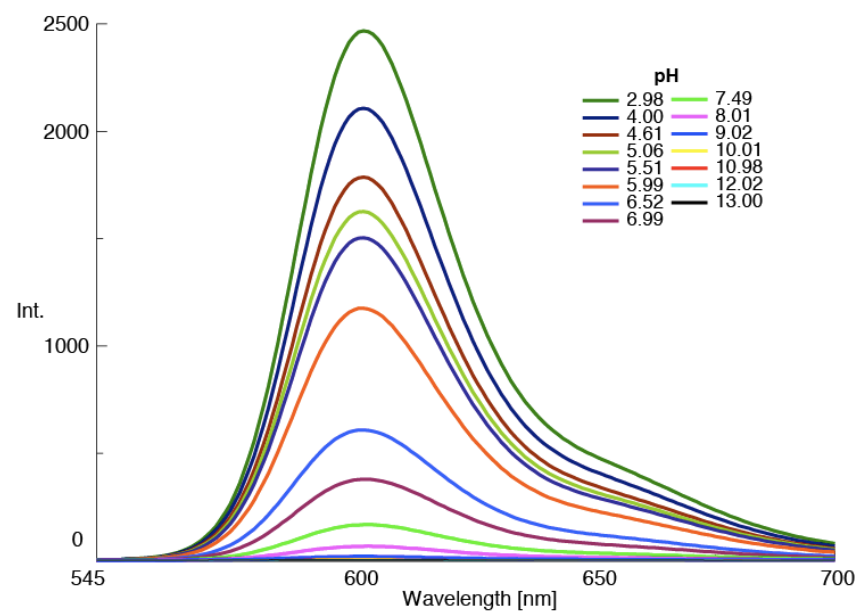

Left: Dependence of absorption on pH in a MOPS buffered aqueous solution. Right: Dependence of fluorescence intensity on pH in a MOPS buffered aqueous solution. Excitation at 535 nm.

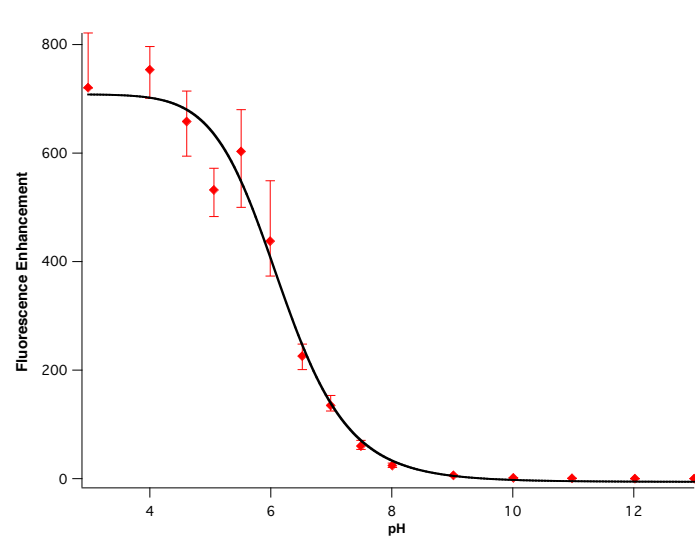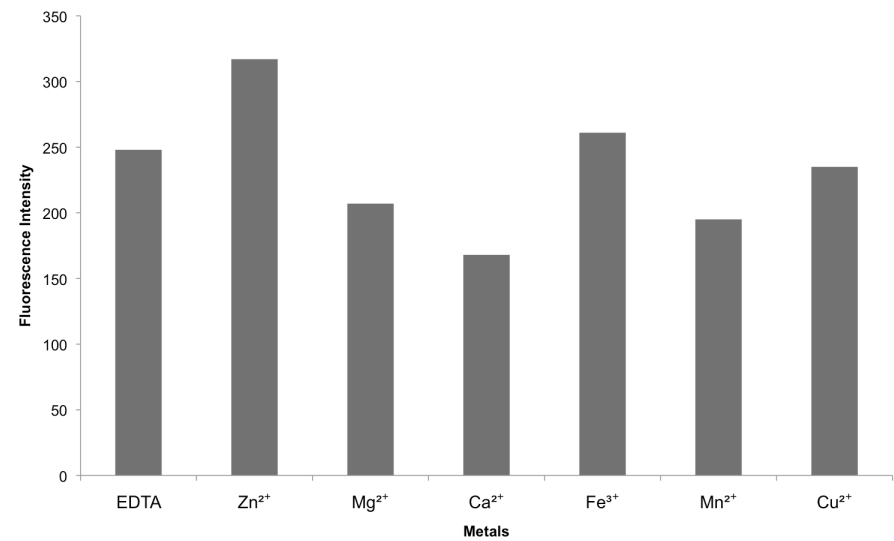

Left: Dependence of fluorescence enhancement on pH. Curve fitting was based on a modified Hill equation from which  $pK_a$  values were calculated. Right: Fluorescence intensities of the probe ( $5 \mu\text{M}$ ) to a range of metal ions in a MOPS buffer (MOPS 30 mM, KCl 100 mM, pH 7.2). The concentration of cations is  $10^{-3}$  M.

## HR-Br

| State            | $\lambda_{\text{abs}}$ (nm) | $\lambda_{\text{em}}$ (nm) | pK <sub>a</sub> | $\epsilon$<br>(M <sup>-1</sup> cm <sup>-1</sup> ) | $\Phi$ | $\Phi_{\text{ON}}/\Phi_{\text{OFF}}$ | Dynamic Intensity |
|------------------|-----------------------------|----------------------------|-----------------|---------------------------------------------------|--------|--------------------------------------|-------------------|
| ON <sup>a</sup>  | 581                         | 601                        | 6.51 ± 0.10     | 24423                                             | 0.55   | -                                    | 384               |
| OFF <sup>b</sup> | 544                         | 600                        |                 | N/A <sup>c</sup>                                  |        |                                      |                   |

<sup>a</sup> Protonated form: pH 4      <sup>c</sup> Non-fluorescent  
<sup>b</sup> Deprotonated form: pH 10

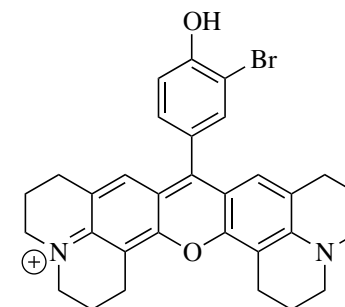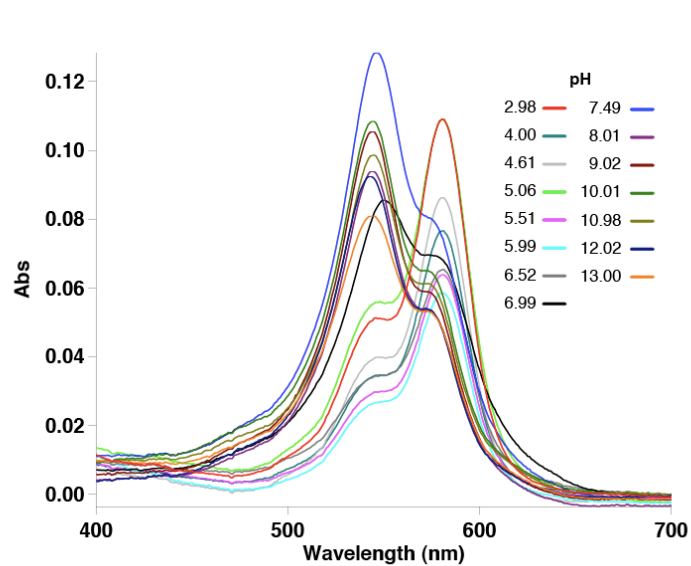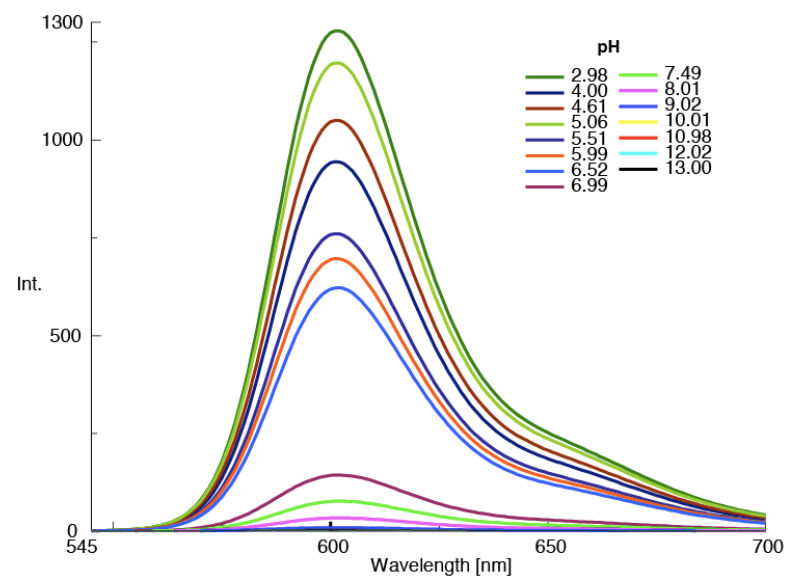

Left: Dependence of absorption on pH in a MOPS buffered aqueous solution. Right: Dependence of fluorescence intensity on pH in a MOPS buffered aqueous solution. Excitation at 535 nm.

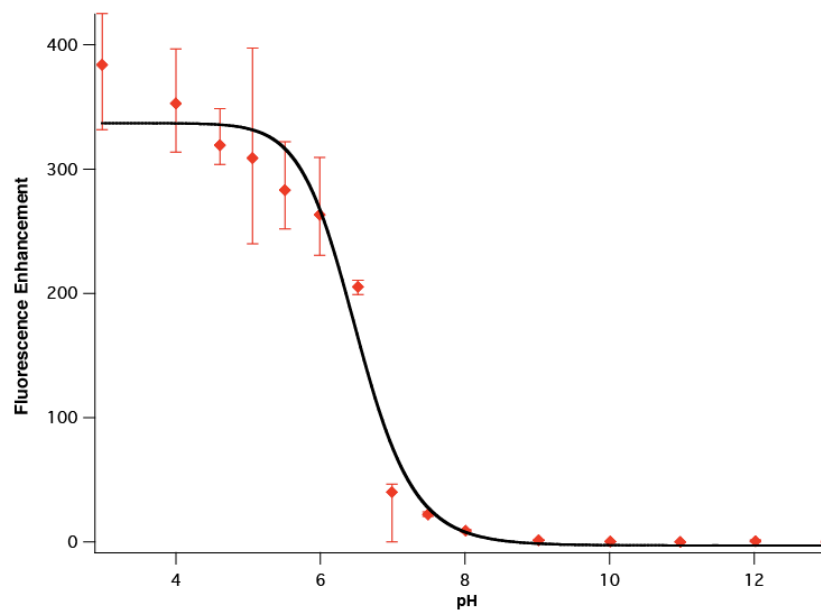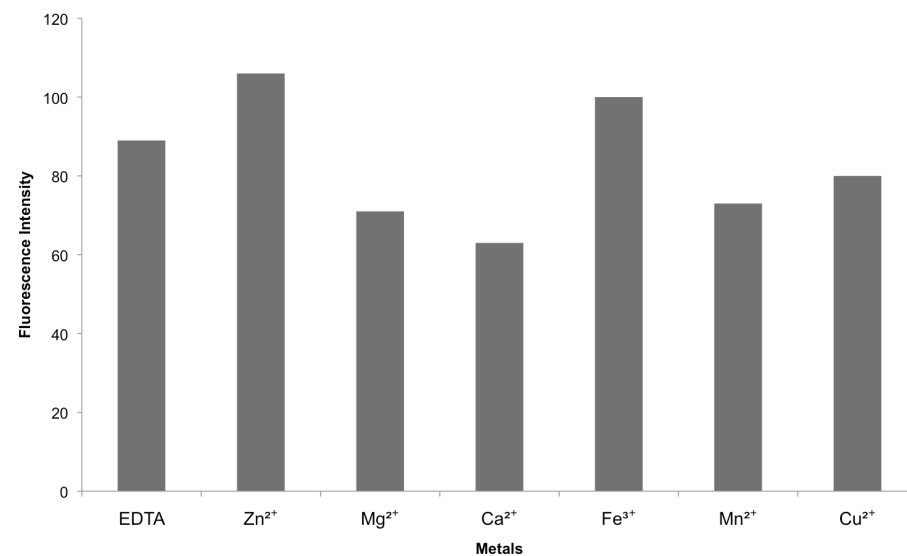

Left: Dependence of fluorescence enhancement on pH. Curve fitting was based on a modified Hill equation from which  $pK_a$  values were calculated. Right: Fluorescence intensities of the probe ( $5 \mu\text{M}$ ) to a range of metal ions in a MOPS buffer (MOPS 30 mM, KCl 100 mM, pH 7.2). The concentration of cations is  $10^{-3}$  M.



## HR-Me

| State            | $\lambda_{\text{abs}}$ (nm) | $\lambda_{\text{em}}$ (nm) | pK <sub>a</sub> | $\epsilon$<br>(M <sup>-1</sup> cm <sup>-1</sup> ) | $\Phi$           | $\Phi_{\text{ON}}/\Phi_{\text{OFF}}$ | Dynamic Intensity |
|------------------|-----------------------------|----------------------------|-----------------|---------------------------------------------------|------------------|--------------------------------------|-------------------|
| ON <sup>a</sup>  | 574                         | 597                        | 8.75 ± 0.16     | 52000                                             | 0.09             | -                                    | 955               |
| OFF <sup>b</sup> | N/A <sup>c</sup>            | 598                        |                 | N/A <sup>c</sup>                                  | N/A <sup>d</sup> |                                      |                   |

<sup>a</sup> Protonated form: pH 4      <sup>d</sup> Non-fluorescent  
<sup>b</sup> Deprotonated form: pH 10  
<sup>c</sup> Poor solubility

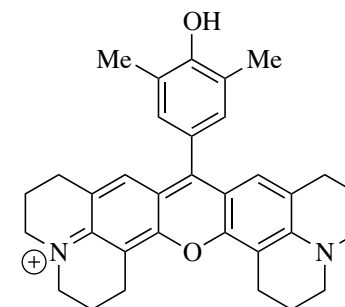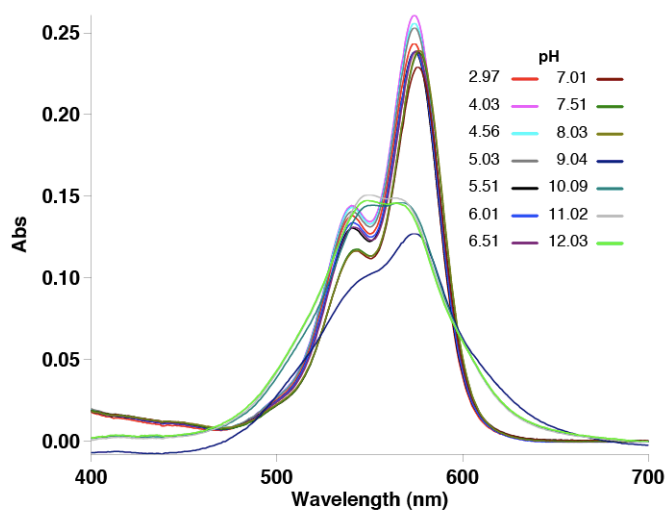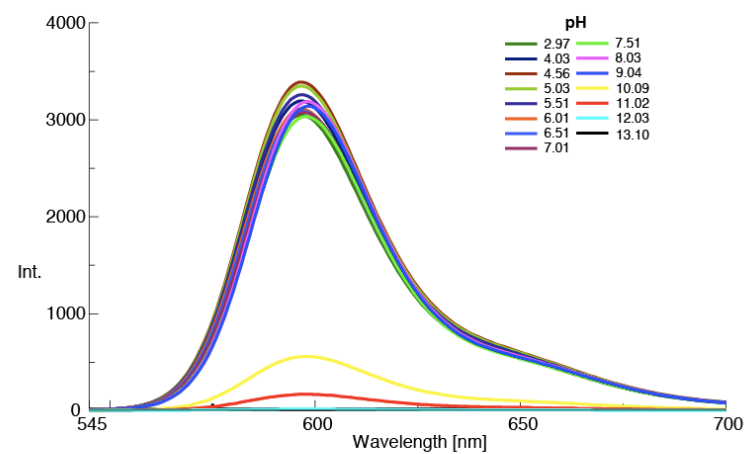

Left: Dependence of absorption on pH in a MOPS buffered aqueous solution. Right: Dependence of fluorescence intensity on pH in a MOPS buffered aqueous solution. Excitation at 535 nm.

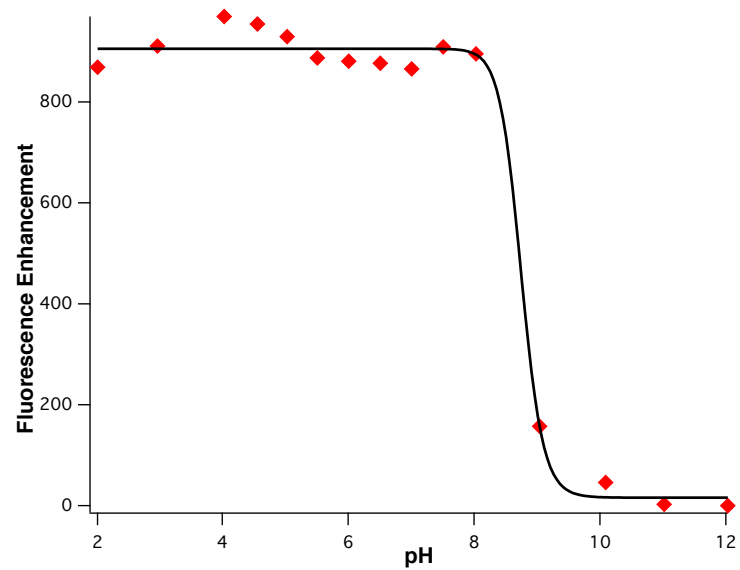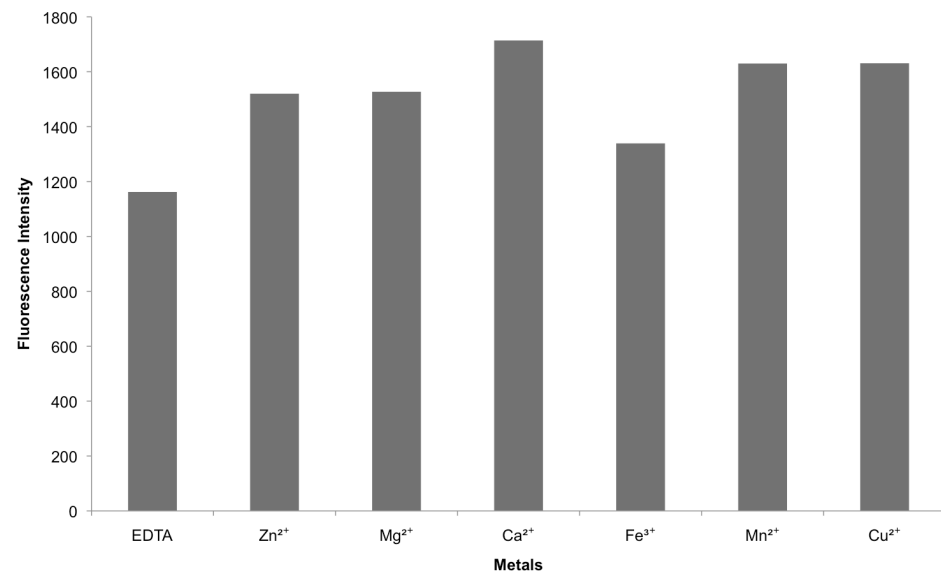

Left: Dependence of fluorescence enhancement on pH. Curve fitting was based on a modified Hill equation from which  $pK_a$  values were calculated. Right: Fluorescence intensities of the probe ( $5 \mu\text{M}$ ) to a range of metal ions in a MOPS buffer (MOPS 30 mM, KCl 100 mM, pH 7.2). The concentration of cations is  $10^{-3} \text{M}$ .

## HR-OMe

| State            | $\lambda_{\text{abs}}$ (nm) | $\lambda_{\text{em}}$ (nm) | pK <sub>a</sub>  | $\epsilon$<br>(M <sup>-1</sup> cm <sup>-1</sup> ) | $\Phi$ | $\Phi_{\text{ON}}/\Phi_{\text{OFF}}$ | Dynamic Intensity |
|------------------|-----------------------------|----------------------------|------------------|---------------------------------------------------|--------|--------------------------------------|-------------------|
| ON <sup>a</sup>  | 577                         | 598                        | N/A <sup>c</sup> | 51955                                             | 0.22   | 8                                    | 302               |
| OFF <sup>b</sup> | 576                         | 600                        |                  | 54578                                             | 0.03   |                                      |                   |

<sup>a</sup> Protonated form: pH 4      <sup>c</sup> pK<sub>a</sub> too high  
<sup>b</sup> Deprotonated form: pH 10

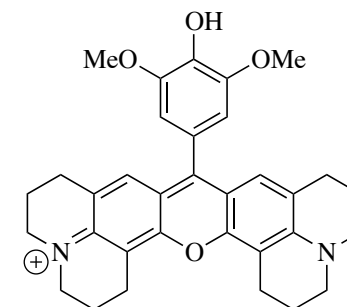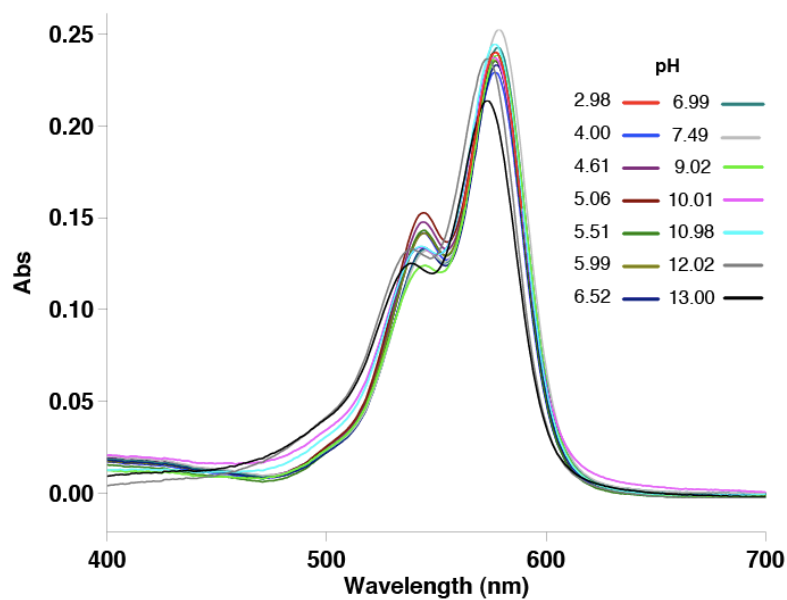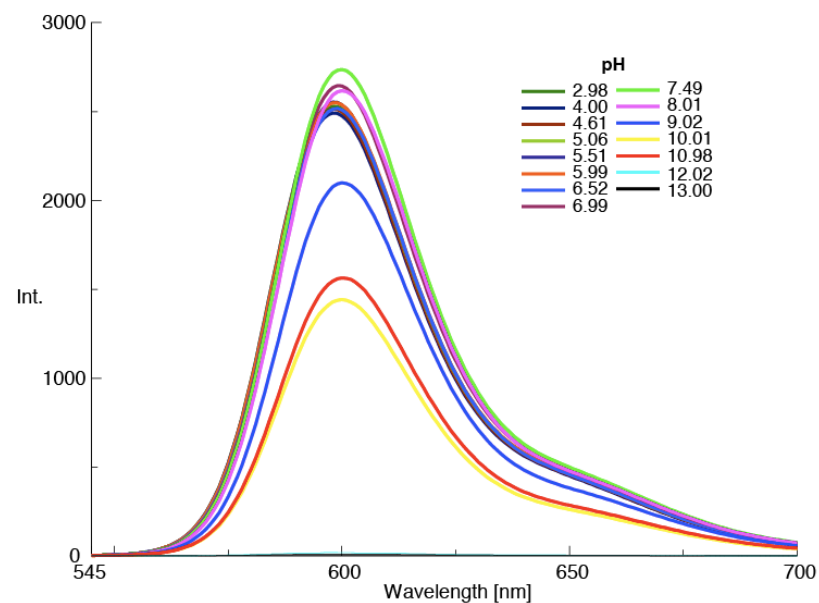

Left: Dependence of absorption on pH in a MOPS buffered aqueous solution. Right: Dependence of fluorescence intensity on pH in a MOPS buffered aqueous solution. Excitation at 535 nm.

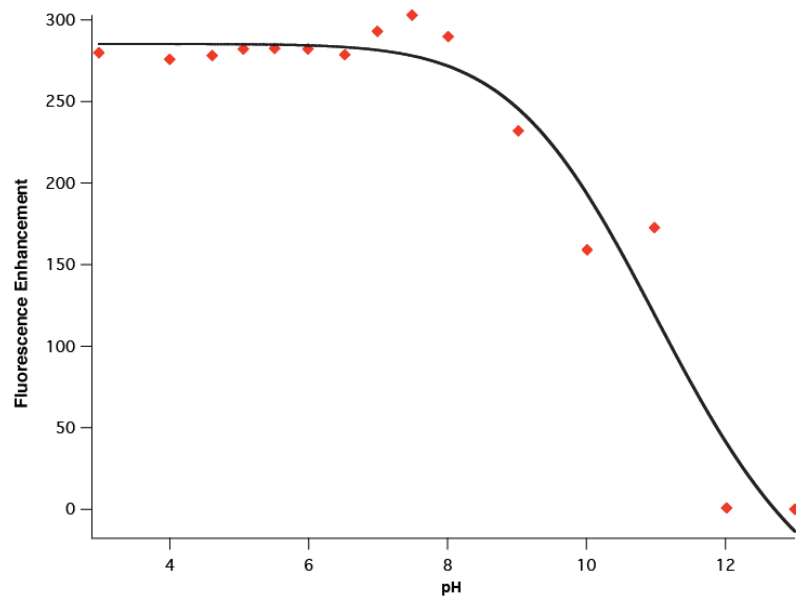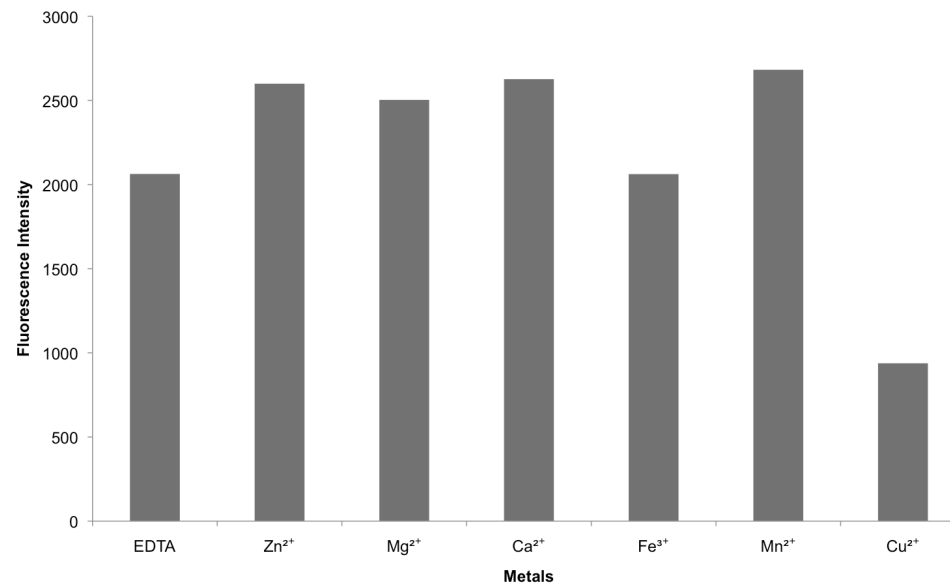

Left: Dependence of fluorescence enhancement on pH. Curve fitting was based on a modified Hill equation from which  $\text{pK}_a$  values were calculated. Right: Fluorescence intensities of the probe (5  $\mu\text{M}$ ) to a range of metal ions in a MOPS buffer (MOPS 30 mM, KCl 100 mM, pH 7.2). The concentration of cations is  $10^{-3}$  M.

## HR-pOH

| State            | $\lambda_{\text{abs}}$ (nm) | $\lambda_{\text{em}}$ (nm) | pK <sub>a</sub> | $\epsilon$<br>(M <sup>-1</sup> cm <sup>-1</sup> ) | $\Phi$ | $\Phi_{\text{ON}}/\Phi_{\text{OFF}}$ | Dynamic Intensity |
|------------------|-----------------------------|----------------------------|-----------------|---------------------------------------------------|--------|--------------------------------------|-------------------|
| ON <sup>a</sup>  | 576                         | 597                        | 8.97 ± 0.05     | 61528                                             | 0.55   | 9                                    | 34                |
| OFF <sup>b</sup> | 579                         | 598                        |                 | 34458                                             | 0.06   |                                      |                   |

<sup>a</sup> Protonated form: pH 4  
<sup>b</sup> Deprotonated form: pH 10

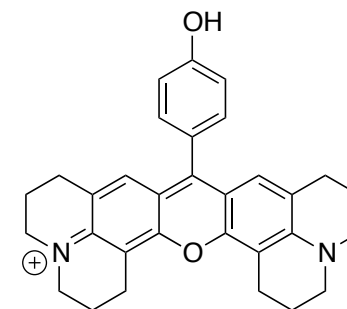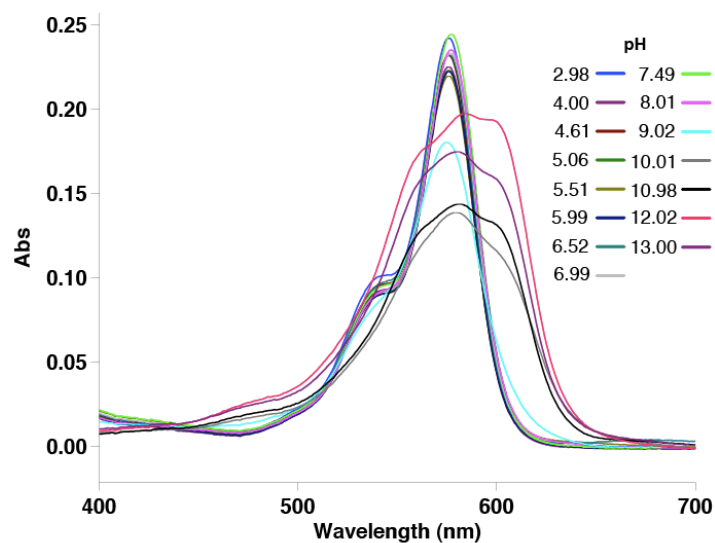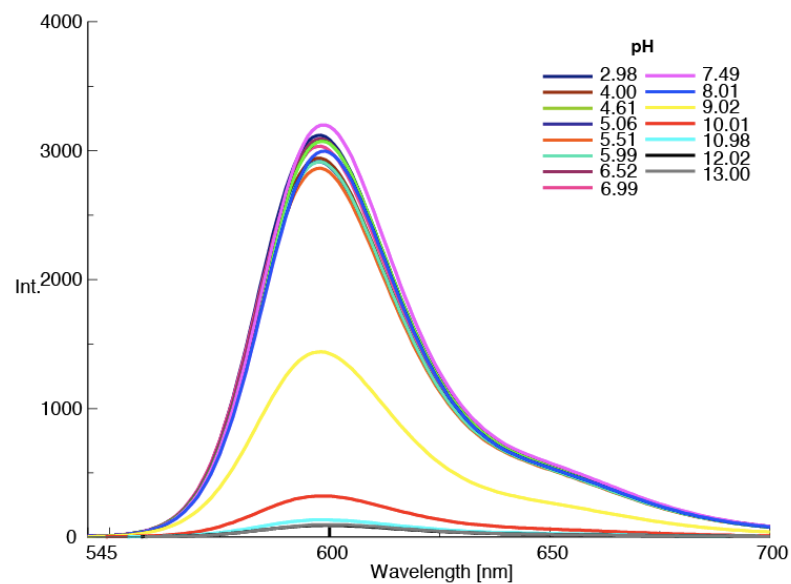

Left: Dependence of absorption on pH in a MOPS buffered aqueous solution. Right: Dependence of fluorescence intensity on pH in a MOPS buffered aqueous solution. Excitation at 535 nm.

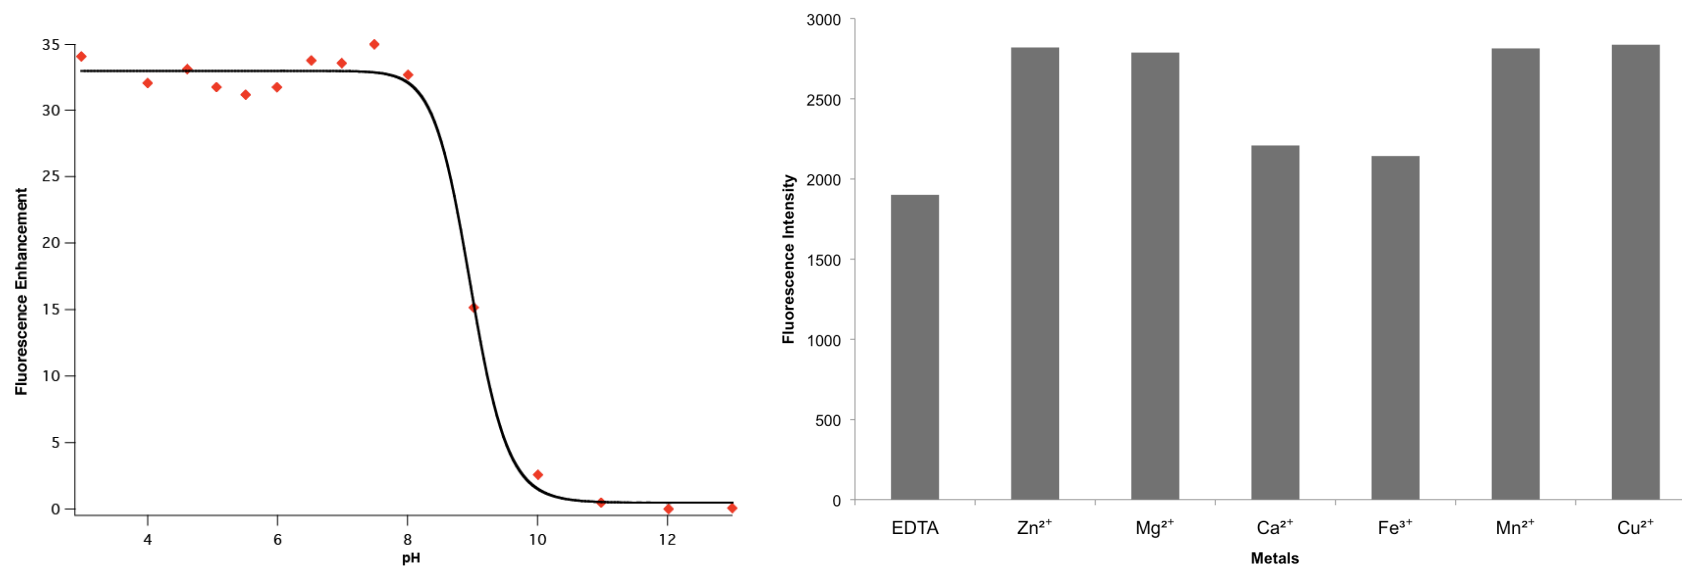

Left: Dependence of fluorescence enhancement on pH. Curve fitting was based on a modified Hill equation from which  $pK_a$  values were calculated. Right: Fluorescence intensities of the probe ( $5 \mu\text{M}$ ) to a range of metal ions in a MOPS buffer (MOPS 30 mM, KCl 100 mM, pH 7.2). The concentration of cations is  $10^{-3} \text{M}$ .

## HR-oOH

| State            | $\lambda_{\text{abs}}$ (nm) | $\lambda_{\text{em}}$ (nm) | pK <sub>a</sub> | $\epsilon$<br>(M <sup>-1</sup> cm <sup>-1</sup> ) | $\Phi$ | $\Phi_{\text{ON}}/\Phi_{\text{OFF}}$ | Dynamic Intensity |
|------------------|-----------------------------|----------------------------|-----------------|---------------------------------------------------|--------|--------------------------------------|-------------------|
| ON <sup>a</sup>  | 581                         | 603                        | 9.68 ± 0.17     | 79073                                             | 0.75   | 3                                    | 866               |
| OFF <sup>b</sup> | 576                         | 603                        |                 | 49872                                             | 0.27   |                                      |                   |

<sup>a</sup> Protonated form: pH 4  
<sup>b</sup> Deprotonated form: pH 10

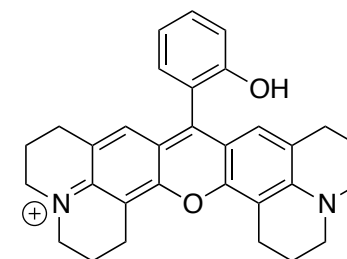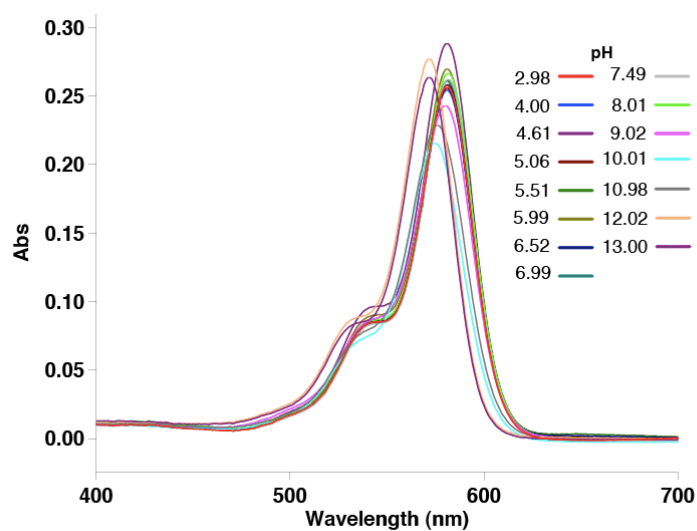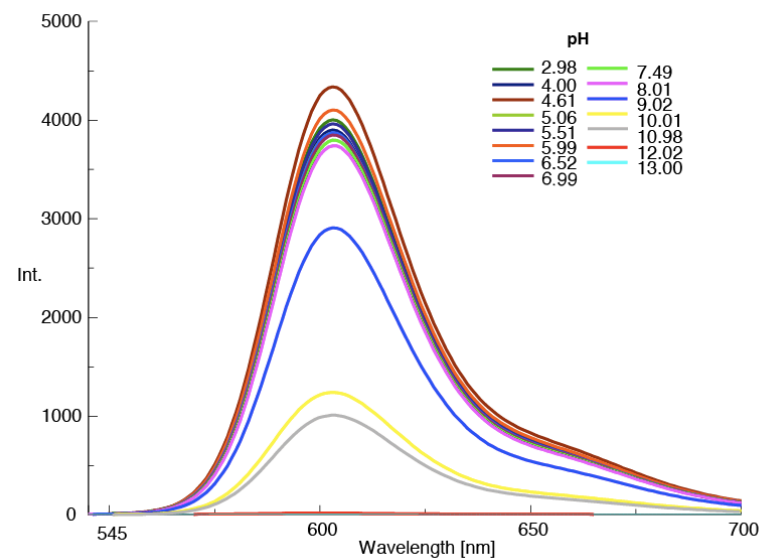

Left: Dependence of absorption on pH in a MOPS buffered aqueous solution. Right: Dependence of fluorescence intensity on pH in a MOPS buffered aqueous solution. Excitation at 535 nm.

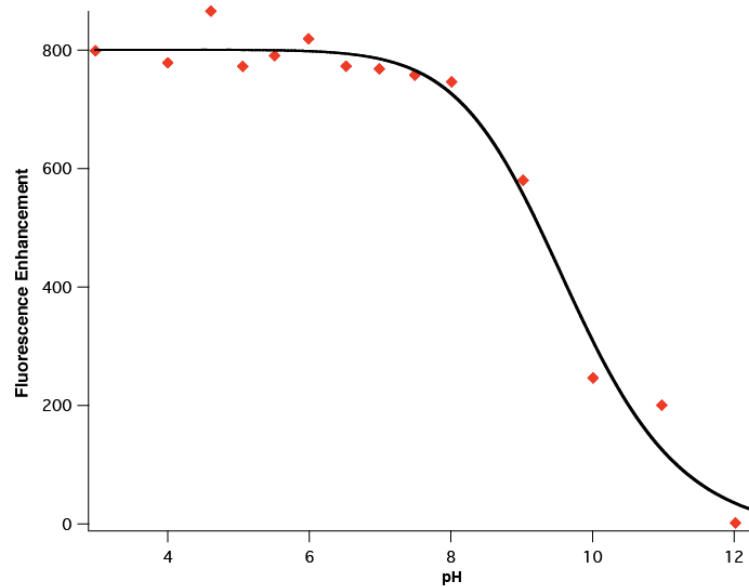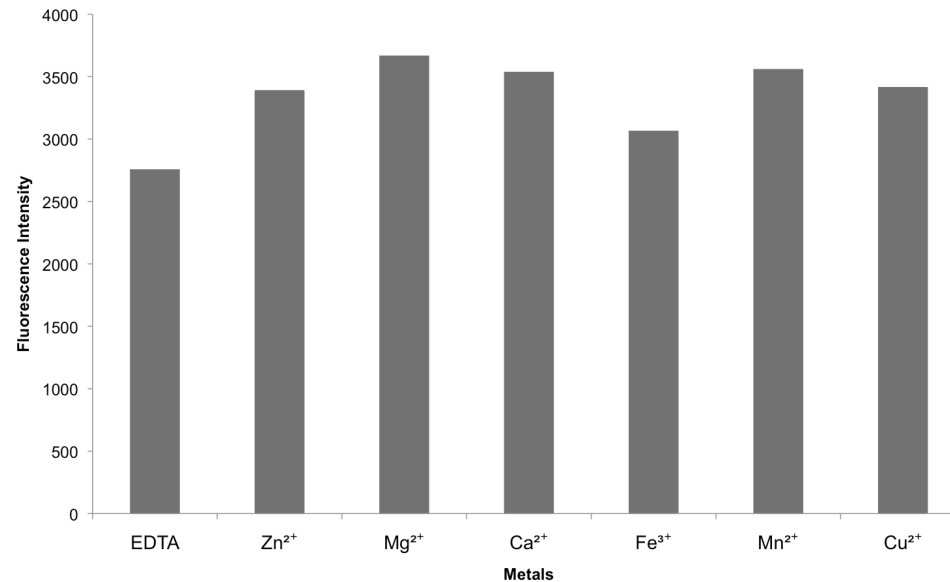

Left: Dependence of fluorescence enhancement on pH. Curve fitting was based on a modified Hill equation from which  $pK_a$  values were calculated. Right: Fluorescence intensities of the probe ( $5 \mu\text{M}$ ) to a range of metal ions in a MOPS buffer (MOPS 30 mM, KCl 100 mM, pH 7.2). The concentration of cations is  $10^{-3} \text{M}$ .



## *p*-Nph

| State            | $\lambda_{\text{abs}}$ (nm) | $\lambda_{\text{em}}$ (nm) | pK <sub>a</sub> | $\epsilon$<br>(M <sup>-1</sup> cm <sup>-1</sup> ) | $\Phi$ | $\Phi_{\text{ON}}/\Phi_{\text{OFF}}$ | Dynamic Intensity |
|------------------|-----------------------------|----------------------------|-----------------|---------------------------------------------------|--------|--------------------------------------|-------------------|
| ON <sup>a</sup>  | 581                         | 600                        | 8.51 ± 0.17     | 62156                                             | 0.28   | 6                                    | 23                |
| OFF <sup>b</sup> | 579                         | 602                        |                 | 22160                                             | 0.05   |                                      |                   |

<sup>a</sup> Protonated form: pH 4  
<sup>b</sup> Deprotonated form: pH 10

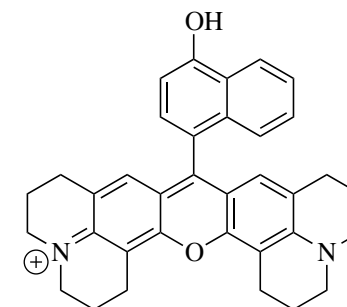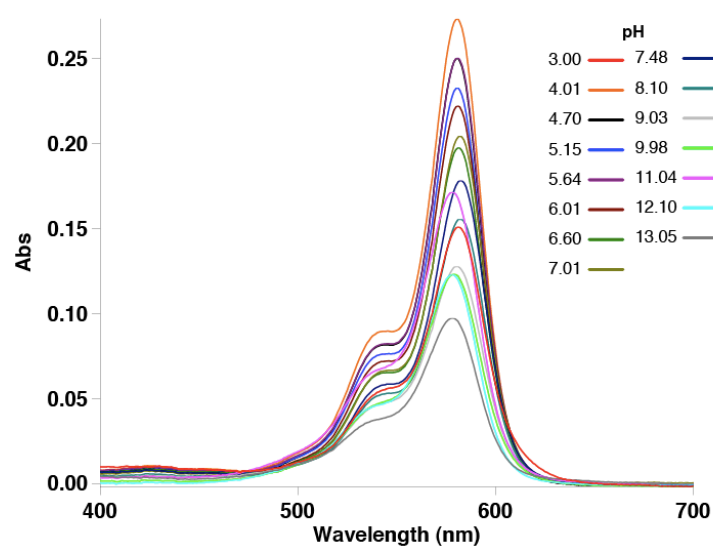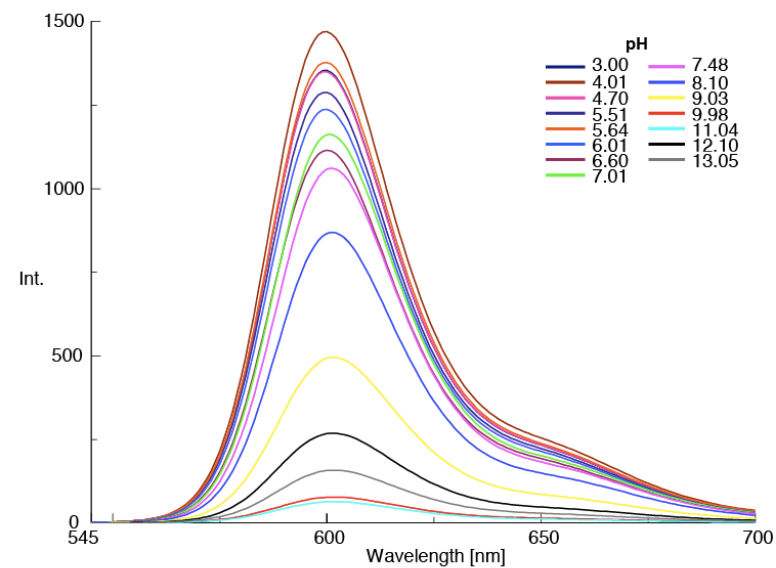

Left: Dependence of absorption on pH in a MOPS buffered aqueous solution. Right: Dependence of fluorescence intensity on pH in a MOPS buffered aqueous solution. Excitation at 535 nm.

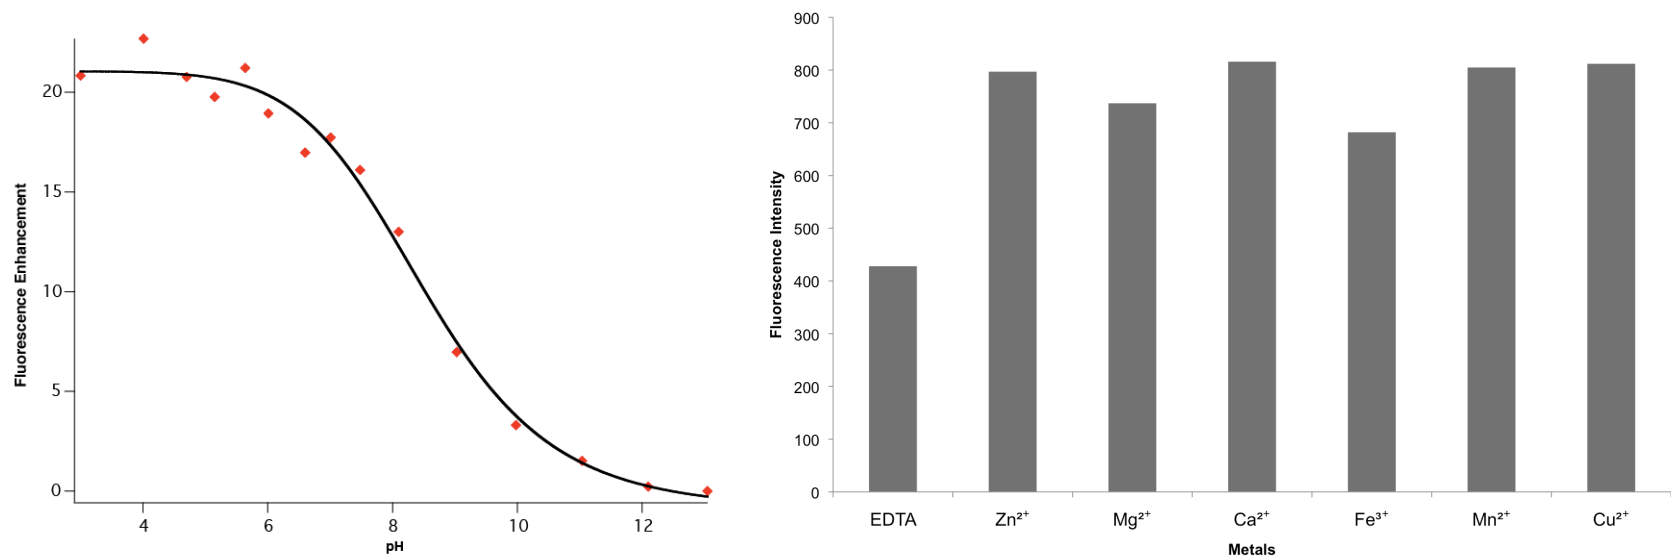

Left: Dependence of fluorescence enhancement on pH. Curve fitting was based on a modified Hill equation from which  $pK_a$  values were calculated. Right: Fluorescence intensities of the probe ( $5 \mu\text{M}$ ) to a range of metal ions in a MOPS buffer (MOPS 30 mM, KCl 100 mM, pH 7.2). The concentration of cations is  $10^{-3}$  M.

## *o*-Nph

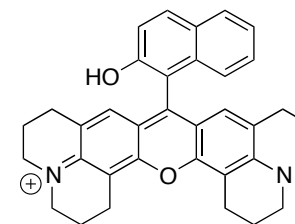

| State            | $\lambda_{\text{abs}}$ (nm) | $\lambda_{\text{em}}$ (nm) | pK <sub>a</sub> | $\epsilon$<br>(M <sup>-1</sup> cm <sup>-1</sup> ) | $\Phi$ | $\Phi_{\text{ON}}/\Phi_{\text{OFF}}$ | Dynamic Intensity |
|------------------|-----------------------------|----------------------------|-----------------|---------------------------------------------------|--------|--------------------------------------|-------------------|
| ON <sup>a</sup>  | 584                         | 604                        | 8.73 ± 0.17     | 26910                                             | 0.77   | 8                                    | 337               |
| OFF <sup>b</sup> | 576                         | 604                        |                 | 28813                                             | 0.10   |                                      |                   |

<sup>a</sup> Protonated form: pH 4

<sup>b</sup> Deprotonated form: pH 10

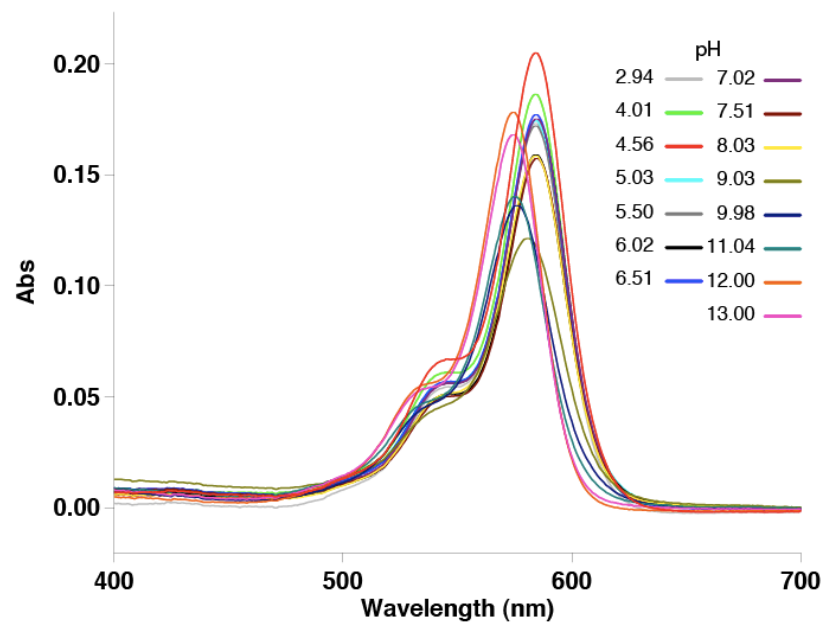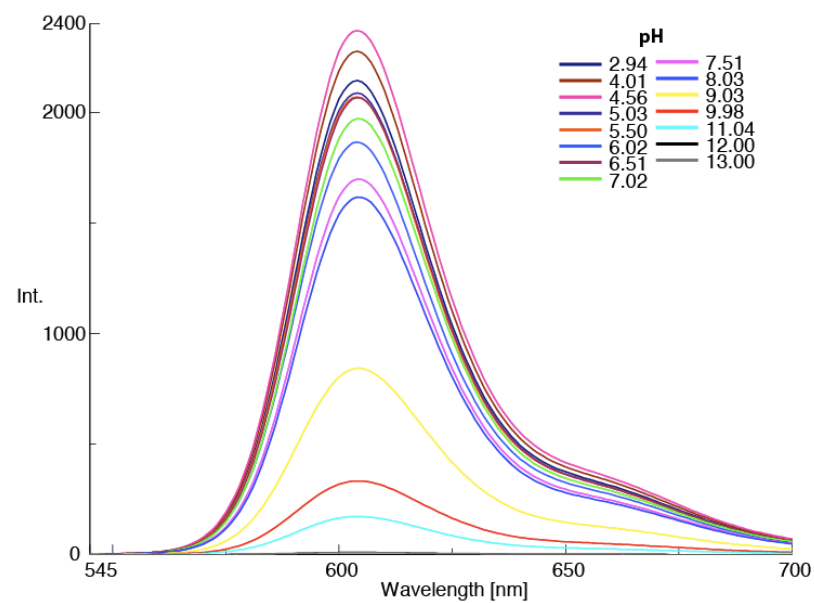

Left: Dependence of absorption on pH in a MOPS buffered aqueous solution. Right: Dependence of fluorescence intensity on pH in a MOPS buffered aqueous solution. Excitation at 535 nm.

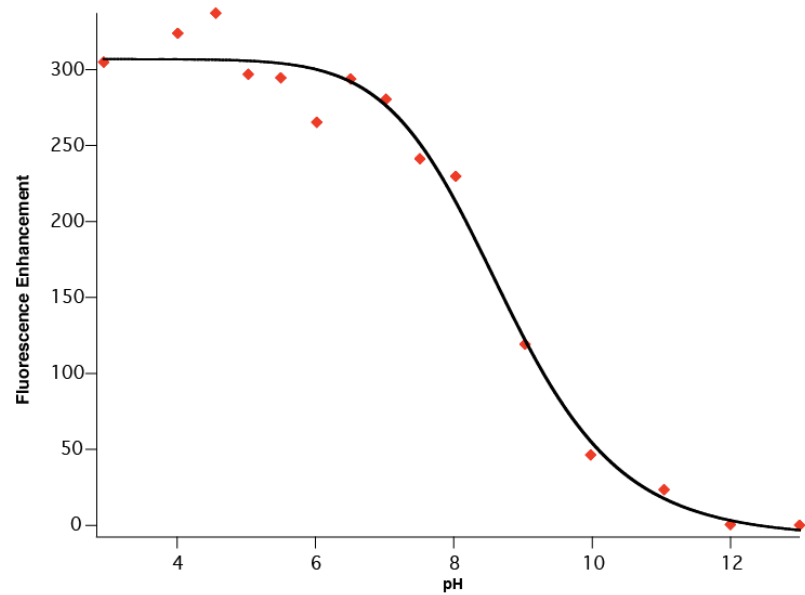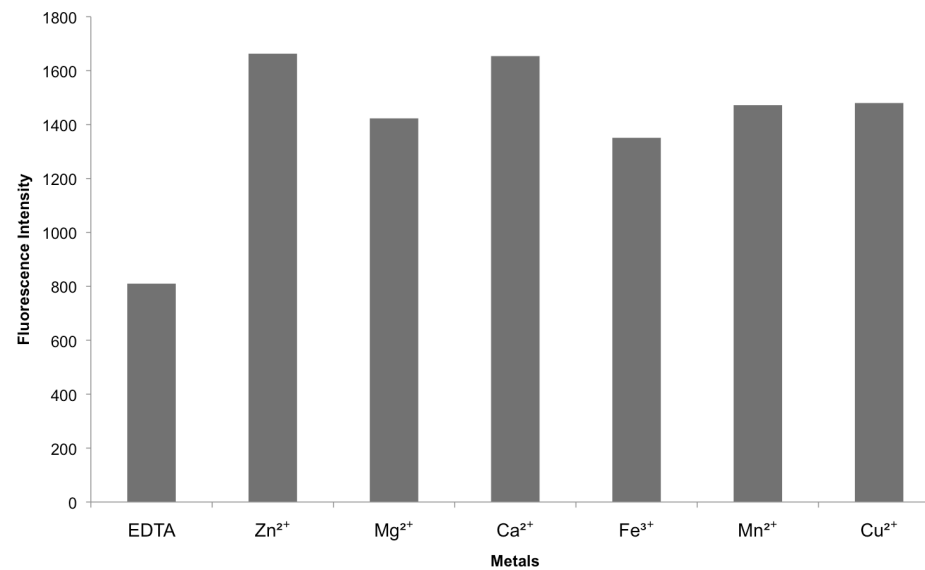

Left: Dependence of fluorescence enhancement on pH. Curve fitting was based on a modified Hill equation from which  $\text{pK}_a$  values were calculated. Right: Fluorescence intensities of the probe (5  $\mu\text{M}$ ) to a range of metal ions in a MOPS buffer (MOPS 30 mM, KCl 100 mM, pH 7.2). The concentration of cations is  $10^{-3}$  M.

## Pip-H

| State            | $\lambda_{\text{abs}}$ (nm) | $\lambda_{\text{em}}$ (nm) | pK <sub>a</sub> | $\epsilon$<br>(M <sup>-1</sup> cm <sup>-1</sup> ) | $\Phi$ | $\Phi_{\text{ON}}/\Phi_{\text{OFF}}$ | Dynamic Intensity |
|------------------|-----------------------------|----------------------------|-----------------|---------------------------------------------------|--------|--------------------------------------|-------------------|
| ON <sup>a</sup>  | 578                         | 600                        | 8.67 ± 0.07     | 76220                                             | 0.16   | 4                                    | 6                 |
| OFF <sup>b</sup> | 579                         | 601                        |                 | 69710                                             | 0.04   |                                      |                   |

<sup>a</sup> Protonated form: pH 4  
<sup>b</sup> Deprotonated form: pH 10

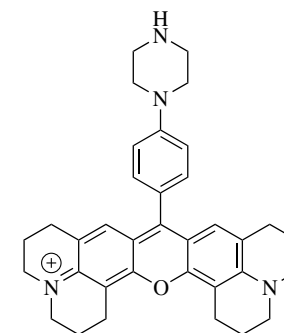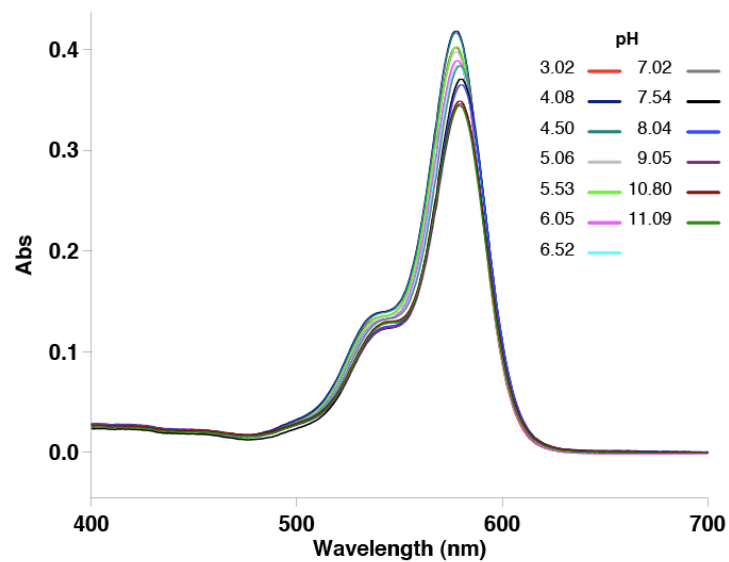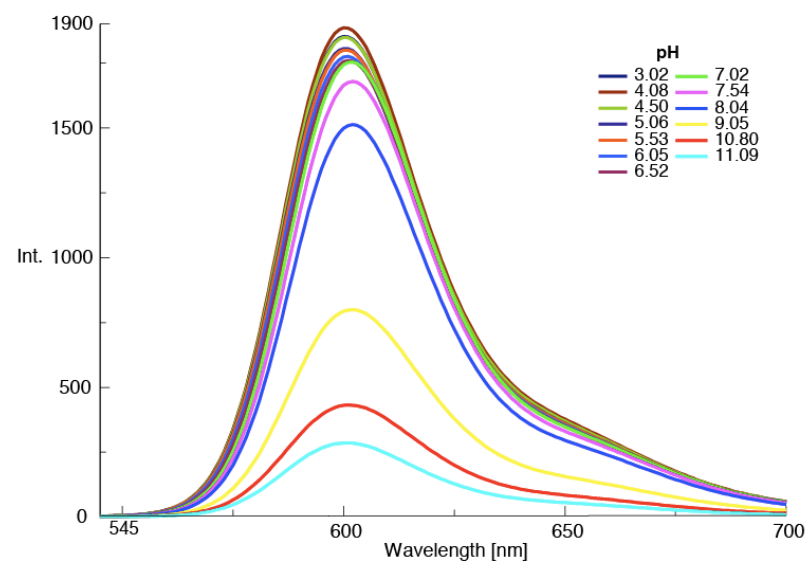

Left: Dependence of absorption on pH in a MOPS buffered aqueous solution. Right: Dependence of fluorescence intensity on pH in a MOPS buffered aqueous solution. Excitation at 535 nm.

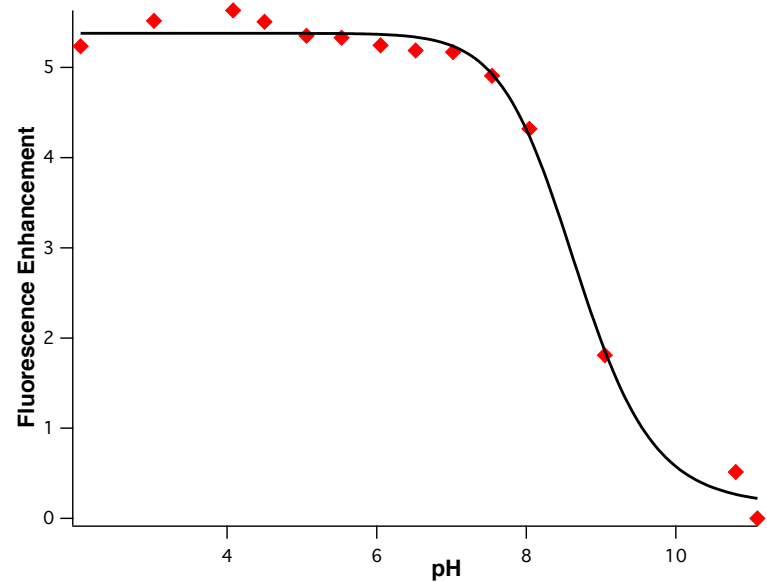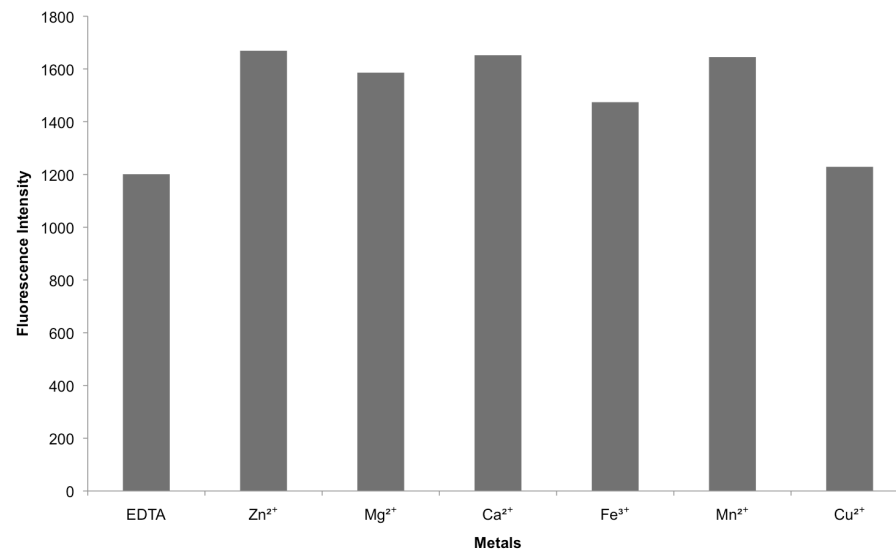

Left: Dependence of fluorescence enhancement on pH. Curve fitting was based on a modified Hill equation from which  $pK_a$  values were calculated. Right: Fluorescence intensities of the probe ( $5 \mu\text{M}$ ) to a range of metal ions in a MOPS buffer (MOPS 30 mM, KCl 100 mM, pH 7.2). The concentration of cations is  $10^{-3}$  M.

## Pip-Alkyne

| State            | $\lambda_{\text{abs}}$ (nm) | $\lambda_{\text{em}}$ (nm) | pK <sub>a</sub> | $\epsilon$<br>(M <sup>-1</sup> cm <sup>-1</sup> ) | $\Phi$ | $\Phi_{\text{ON}}/\Phi_{\text{OFF}}$ | Dynamic Intensity |
|------------------|-----------------------------|----------------------------|-----------------|---------------------------------------------------|--------|--------------------------------------|-------------------|
| ON <sup>a</sup>  | 577                         | 600                        | 4.95 ± 0.09     | 95685                                             | 0.34   | 2                                    | 3                 |
| OFF <sup>b</sup> | 579                         | 602                        |                 | 28554                                             | 0.15   |                                      |                   |

<sup>a</sup> Protonated form: pH 4  
<sup>b</sup> Deprotonated form: pH 10

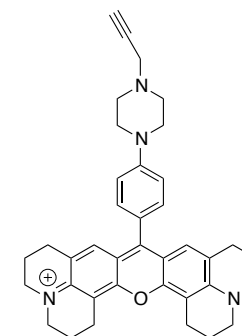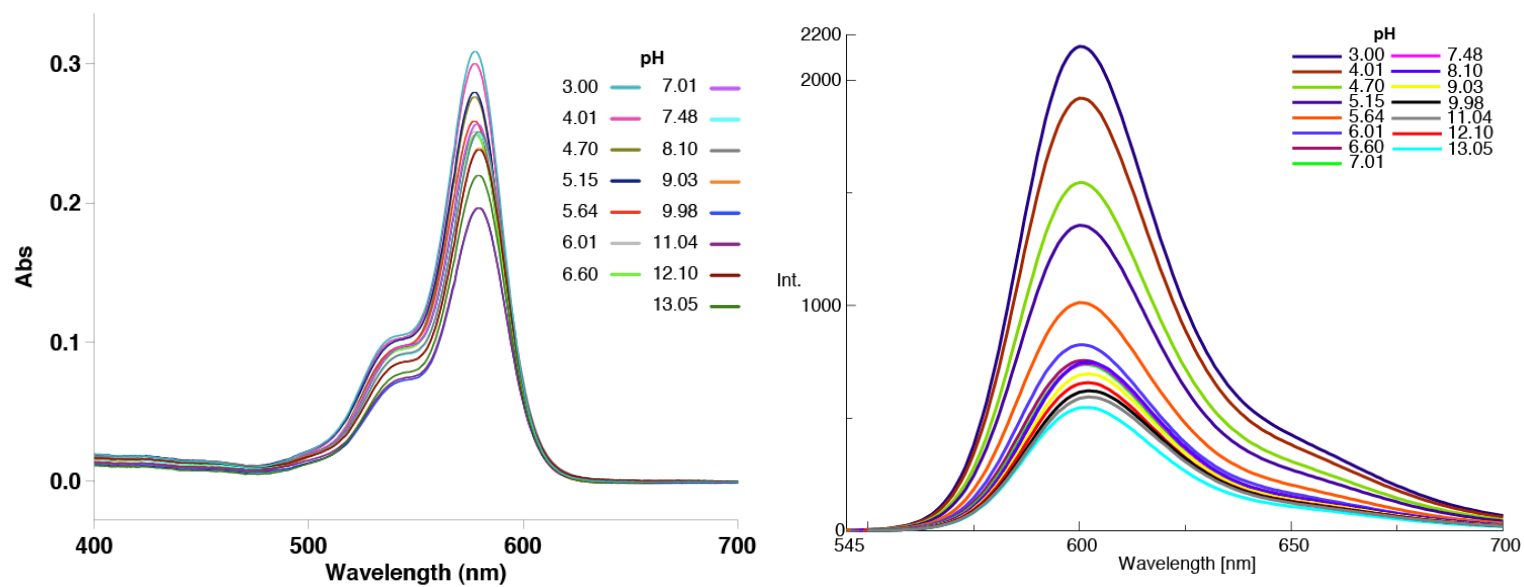

Left: Dependence of absorption on pH in a MOPS buffered aqueous solution. Right: Dependence of fluorescence intensity on pH in a MOPS buffered aqueous solution. Excitation at 535 nm.

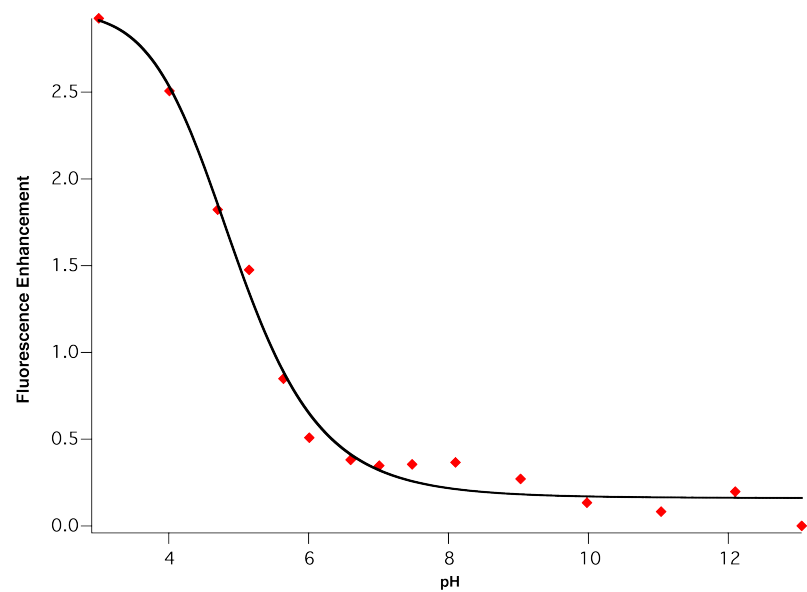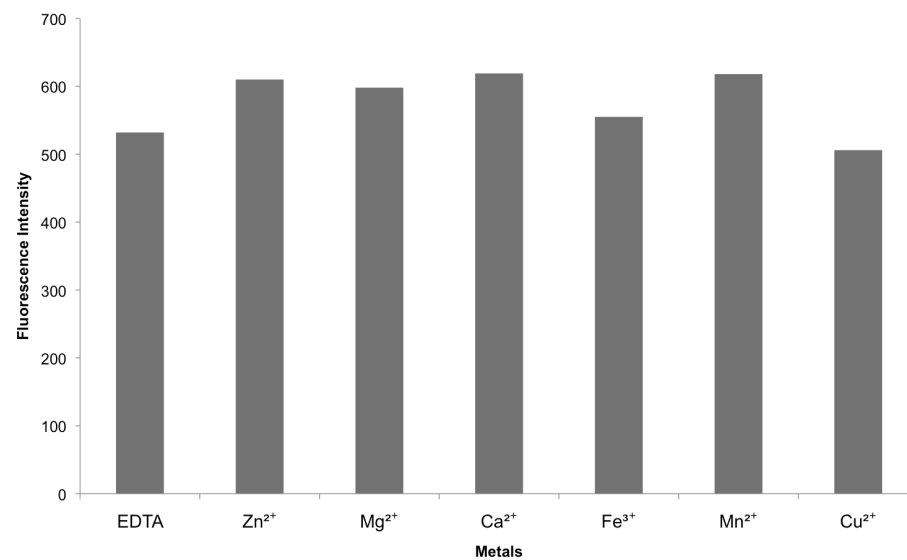

Left: Dependence of fluorescence enhancement on pH. Curve fitting was based on a modified Hill equation from which  $pK_a$  values were calculated. Right: Fluorescence intensities of the probe ( $5 \mu\text{M}$ ) to a range of metal ions in a MOPS buffer (MOPS 30 mM, KCl 100 mM, pH 7.2). The concentration of cations is  $10^{-3}$  M.



## HR-PiAC

| State            | $\lambda_{\text{abs}}$ (nm) | $\lambda_{\text{em}}$ (nm) | $\text{pK}_a$ | $\epsilon$<br>( $\text{M}^{-1} \text{cm}^{-1}$ ) | $\Phi$ | $\Phi_{\text{ON}}/\Phi_{\text{OFF}}$ | Dynamic Intensity |
|------------------|-----------------------------|----------------------------|---------------|--------------------------------------------------|--------|--------------------------------------|-------------------|
| ON <sup>a</sup>  | 580                         | 601                        | 7.68 ± 0.09   | 72405                                            | 0.64   | 40                                   | 86                |
| OFF <sup>b</sup> | 575                         | 602                        |               | 49298                                            | 0.02   |                                      |                   |

<sup>a</sup> Protonated form: pH 4  
<sup>b</sup> Deprotonated form: pH 10

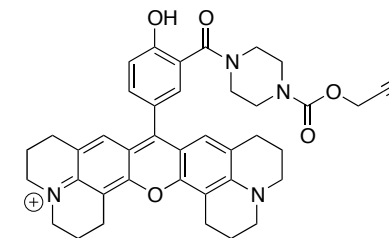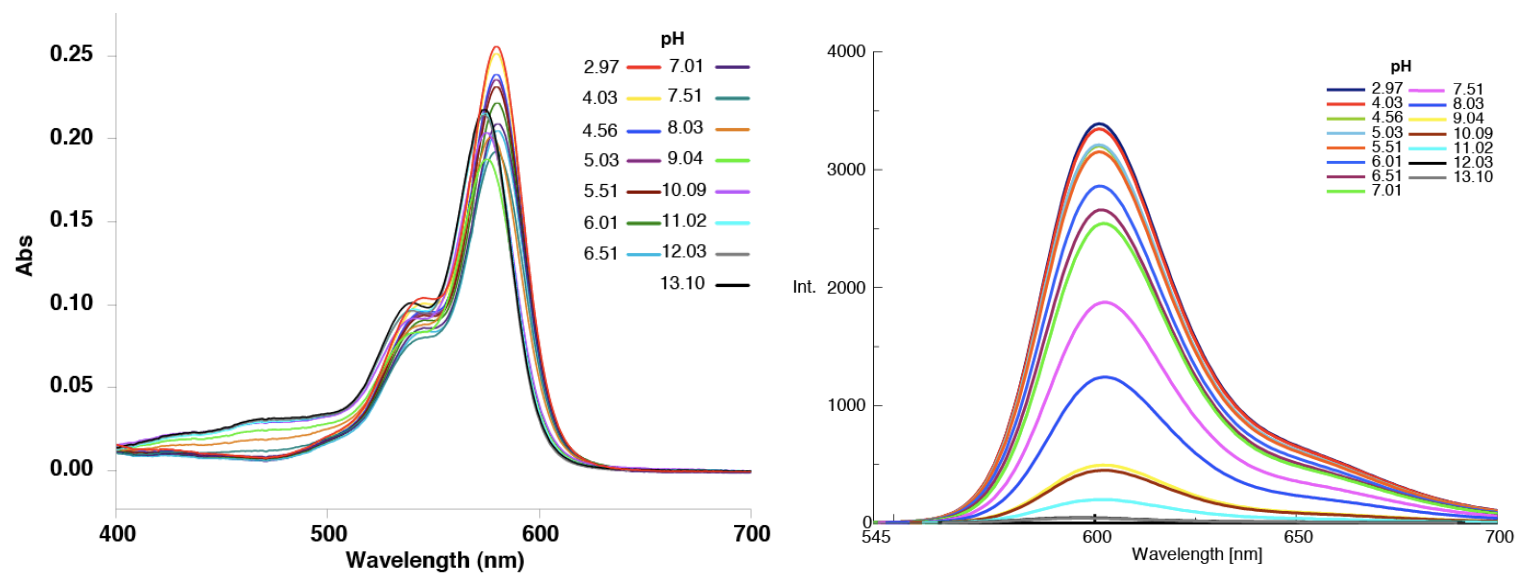

Left: Dependence of absorption on pH in a MOPS buffered aqueous solution. Right: Dependence of fluorescence intensity on pH in a MOPS buffered aqueous solution. Excitation at 535 nm.

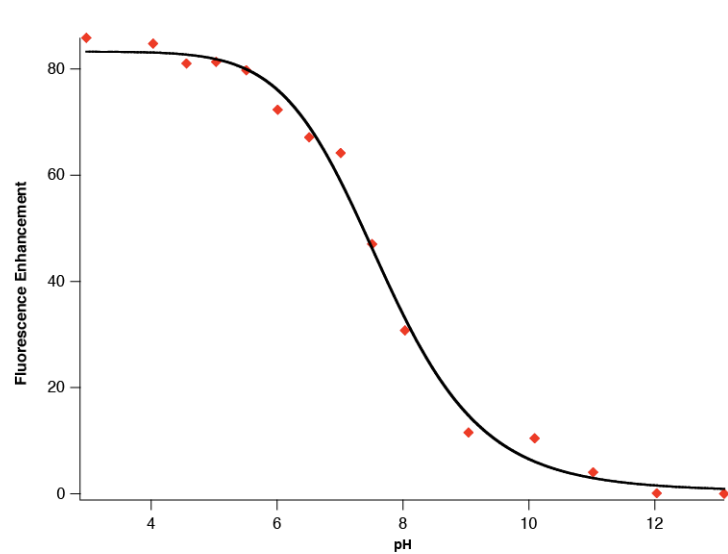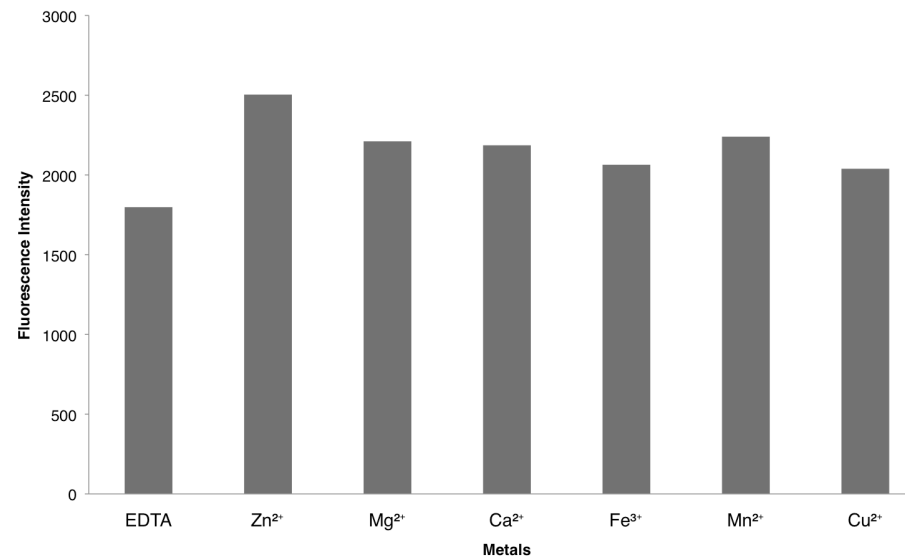

Left: Dependence of fluorescence enhancement on pH. Curve fitting was based on a modified Hill equation from which  $pK_a$  values were calculated. Right: Fluorescence intensities of the probe ( $5 \mu\text{M}$ ) to a range of metal ions in a MOPS buffer (MOPS 30 mM, KCl 100 mM, pH 7.2). The concentration of cations is  $10^{-3}$  M.

## HR-PiA

| State            | $\lambda_{\text{abs}}$ (nm) | $\lambda_{\text{em}}$ (nm) | pK <sub>a</sub> | $\epsilon$<br>(M <sup>-1</sup> cm <sup>-1</sup> ) | $\Phi$ | $\Phi_{\text{ON}}/\Phi_{\text{OFF}}$ | Dynamic Intensity |
|------------------|-----------------------------|----------------------------|-----------------|---------------------------------------------------|--------|--------------------------------------|-------------------|
| ON <sup>a</sup>  | 580                         | 601                        | 7.64 ± 0.10     | 35109                                             | 0.80   | 35                                   | 98                |
| OFF <sup>b</sup> | 574                         | 600                        |                 | 20712                                             | 0.02   |                                      |                   |

<sup>a</sup> Protonated form: pH 4  
<sup>b</sup> Deprotonated form: pH 10

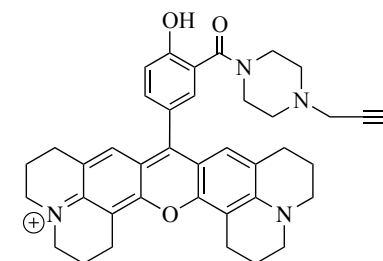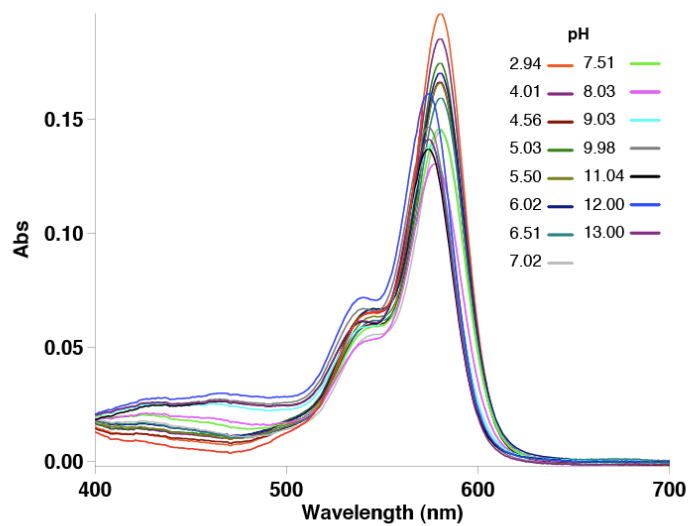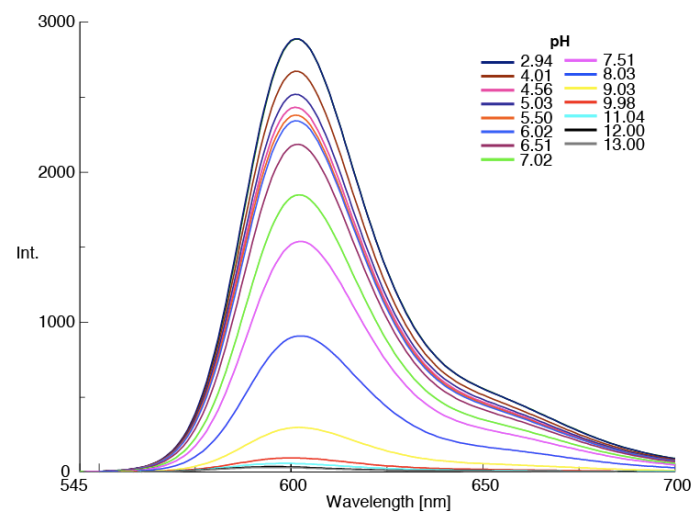

Left: Dependence of absorption on pH in a MOPS buffered aqueous solution. Right: Dependence of fluorescence intensity on pH in a MOPS buffered aqueous solution. Excitation at 535 nm.

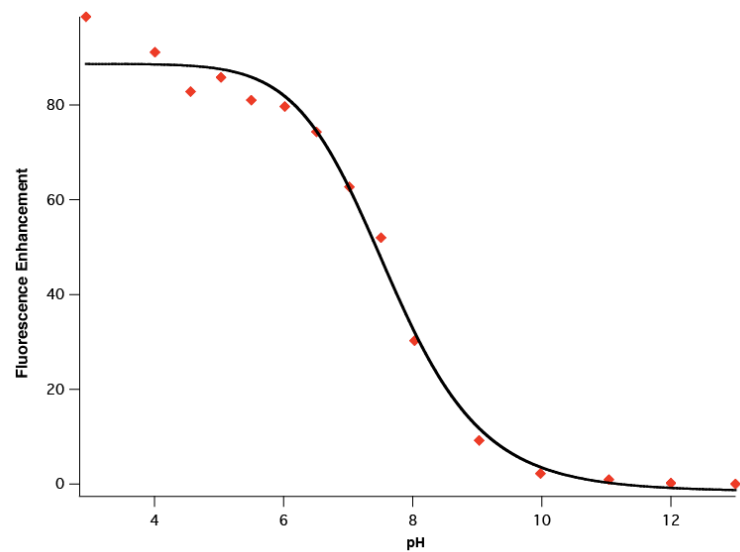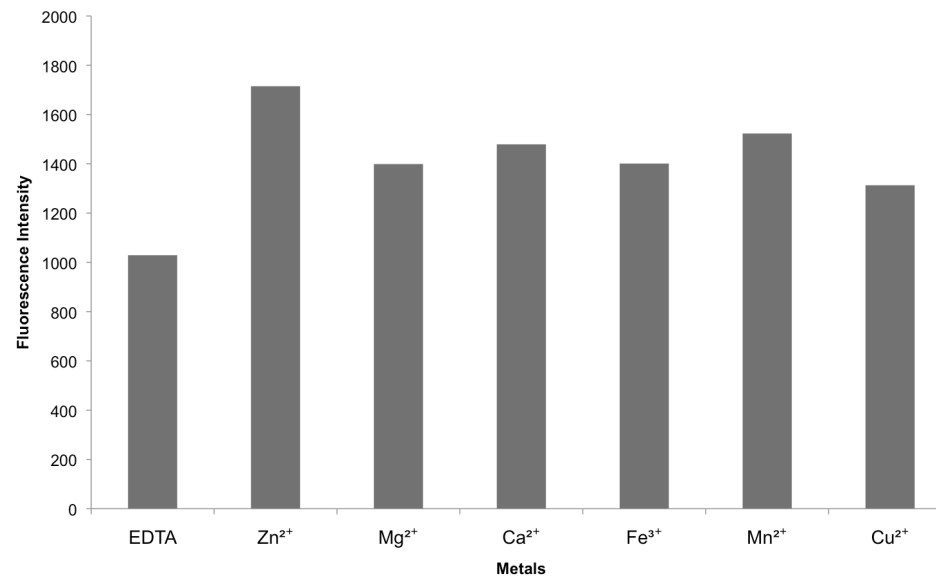

Left: Dependence of fluorescence enhancement on pH. Curve fitting was based on a modified Hill equation from which  $pK_a$  values were calculated. Right: Fluorescence intensities of the probe ( $5 \mu\text{M}$ ) to a range of metal ions in a MOPS buffer (MOPS 30 mM, KCl 100 mM, pH 7.2). The concentration of cations is  $10^{-3}$  M.

## HR-A

| State            | $\lambda_{\text{abs}}$ (nm) | $\lambda_{\text{em}}$ (nm) | pK <sub>a</sub> | $\epsilon$<br>(M <sup>-1</sup> cm <sup>-1</sup> ) | $\Phi$ | $\Phi_{\text{ON}}/\Phi_{\text{OFF}}$ | Dynamic Intensity |
|------------------|-----------------------------|----------------------------|-----------------|---------------------------------------------------|--------|--------------------------------------|-------------------|
| ON <sup>a</sup>  | 574                         | 600                        | 5.33 ± 0.13     | 18421                                             | 0.09   | 6                                    | 6                 |
| OFF <sup>b</sup> | 534                         | 598                        |                 | 38042                                             | 0.02   |                                      |                   |

<sup>a</sup> Protonated form: pH 4  
<sup>b</sup> Deprotonated form: pH 10

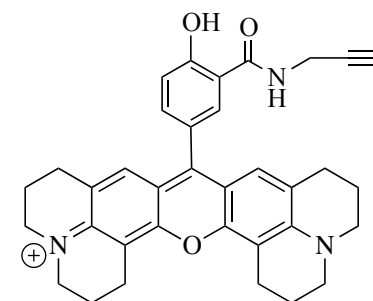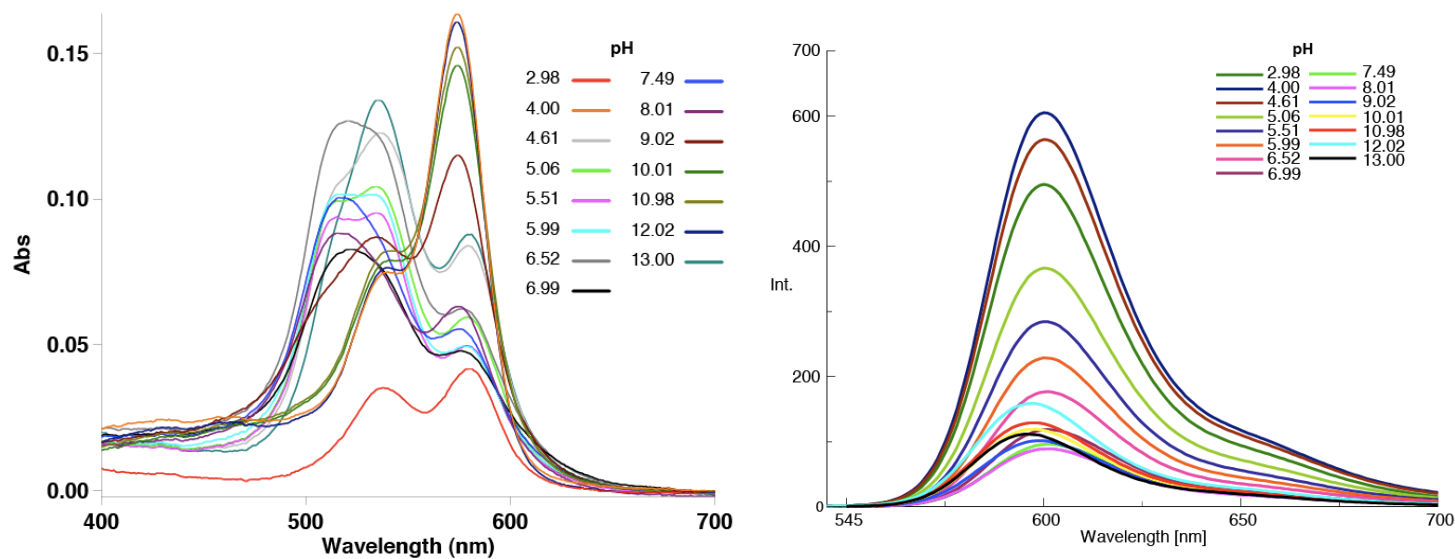

Left: Dependence of absorption on pH in a MOPS buffered aqueous solution. Right: Dependence of fluorescence intensity on pH in a MOPS buffered aqueous solution. Excitation at 535 nm.

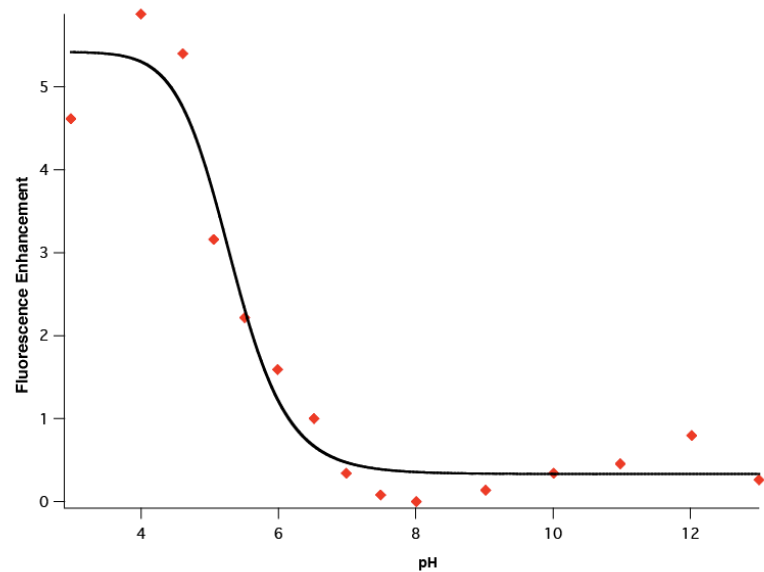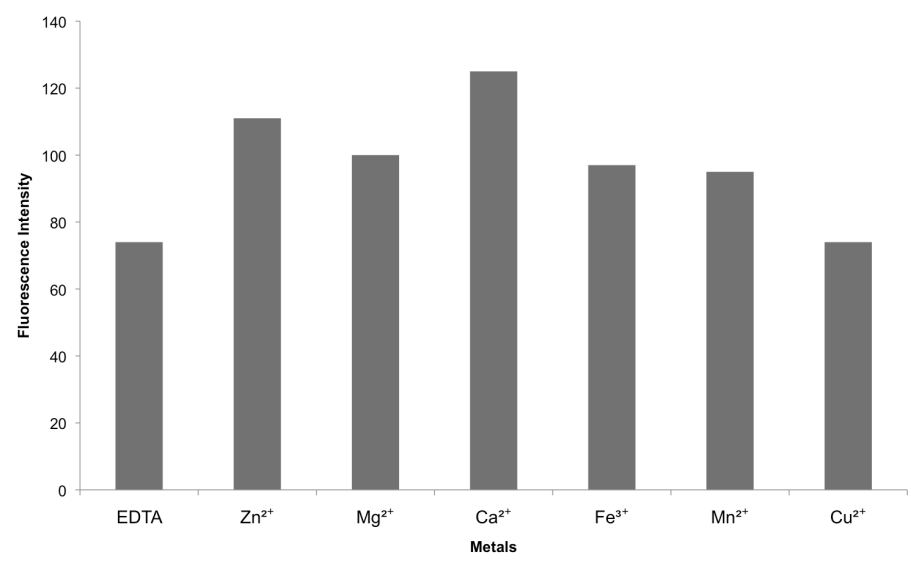

Left: Dependence of fluorescence enhancement on pH. Curve fitting was based on a modified Hill equation from which  $pK_a$  values were calculated. Right: Fluorescence intensities of the probe ( $5 \mu\text{M}$ ) to a range of metal ions in a MOPS buffer (MOPS 30 mM, KCl 100 mM, pH 7.2). The concentration of cations is  $10^{-3}$  M.

### HR-N<sub>3</sub>

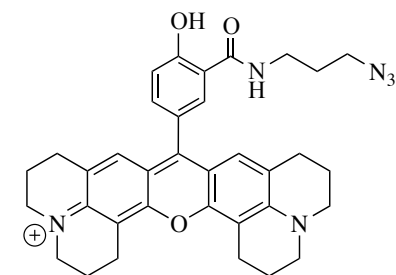

| State            | $\lambda_{\text{abs}}$ (nm) | $\lambda_{\text{em}}$ (nm) | pK <sub>a</sub> | $\epsilon$<br>(M <sup>-1</sup> cm <sup>-1</sup> ) | $\Phi$ | $\Phi_{\text{ON}}/\Phi_{\text{OFF}}$ | Dynamic Intensity |
|------------------|-----------------------------|----------------------------|-----------------|---------------------------------------------------|--------|--------------------------------------|-------------------|
| ON <sup>a</sup>  | 580                         | 600                        | 3.96 ± 0.03     | 26742                                             | 0.25   | 28                                   | 88                |
| OFF <sup>b</sup> | 574                         | 596                        |                 | 26706                                             | 0.01   |                                      |                   |

<sup>a</sup> Protonated form: pH 4

<sup>b</sup> Deprotonated form: pH 10

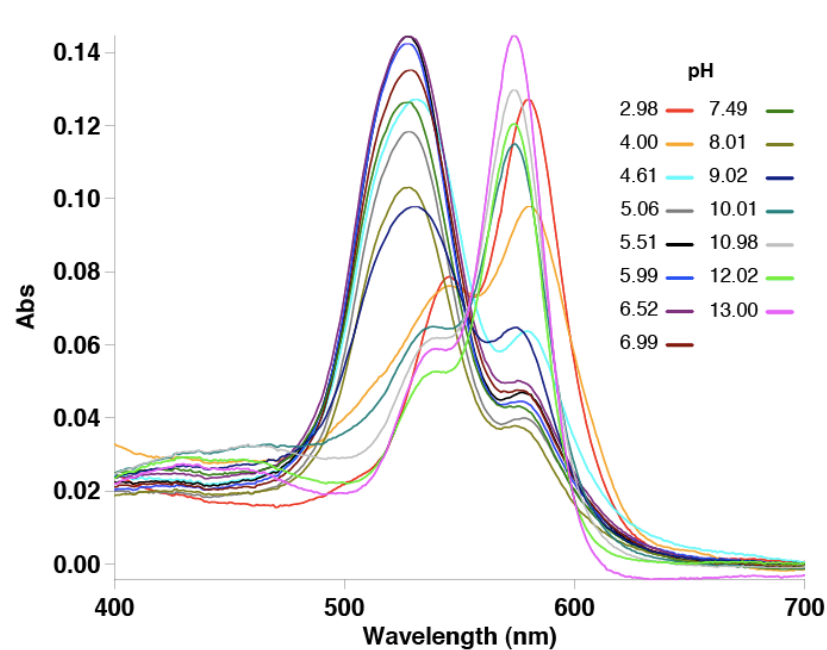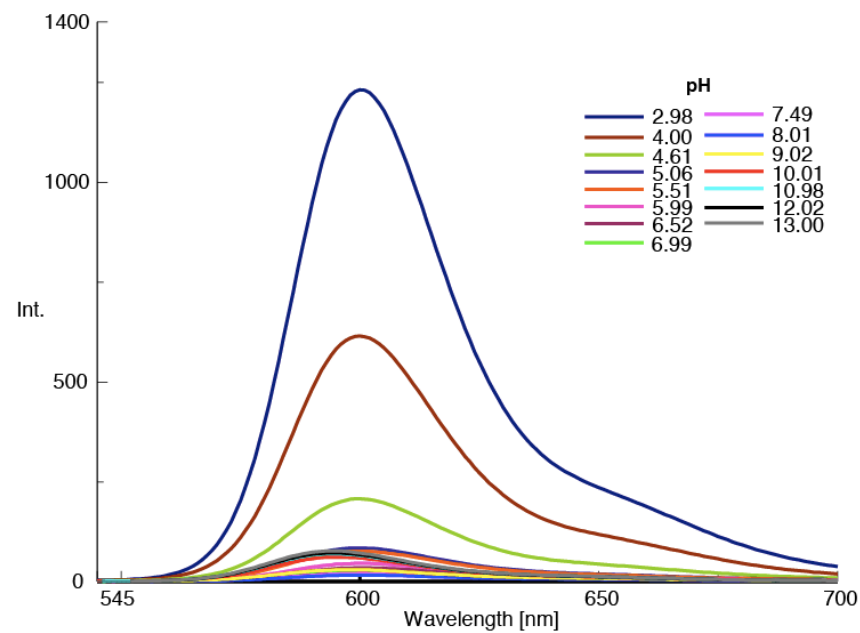

Left: Dependence of absorption on pH in a MOPS buffered aqueous solution. Right: Dependence of fluorescence intensity on pH in a MOPS buffered aqueous solution. Excitation at 535 nm.

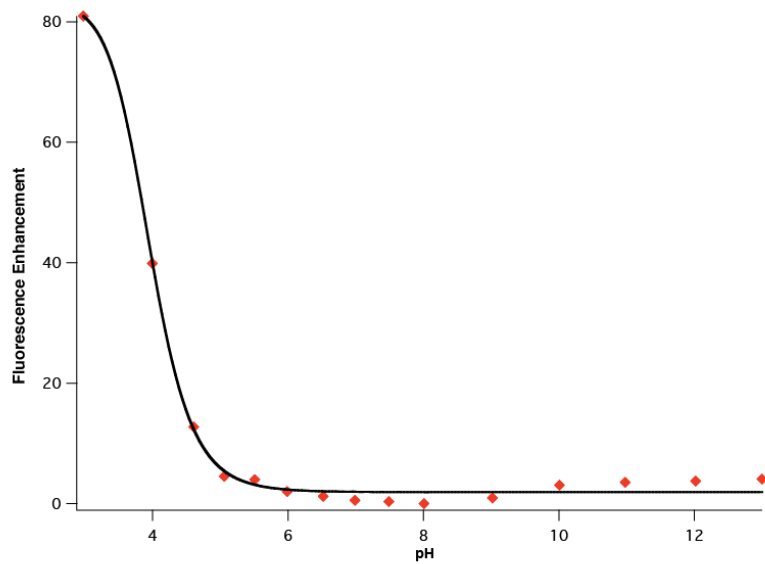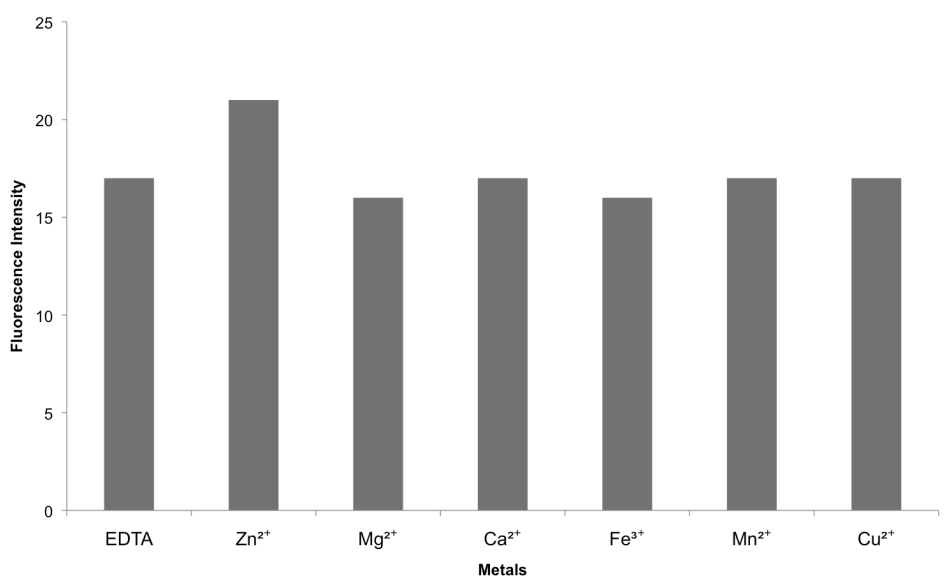

Left: Dependence of fluorescence enhancement on pH. Curve fitting was based on a modified Hill equation from which  $pK_a$  values were calculated. Right: Fluorescence intensities of the probe ( $5 \mu\text{M}$ ) to a range of metal ions in a MOPS buffer (MOPS 30 mM, KCl 100 mM, pH 7.2). The concentration of cations is  $10^{-3}$  M.



## HR-Ala

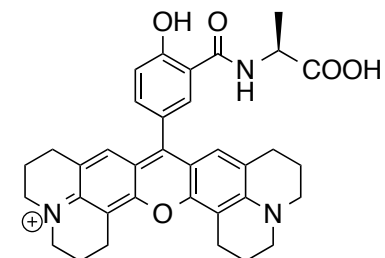

| State            | $\lambda_{\text{abs}}$ (nm) | $\lambda_{\text{em}}$ (nm) | pK <sub>a</sub> | $\epsilon$<br>(M <sup>-1</sup> cm <sup>-1</sup> ) | $\Phi$ | $\Phi_{\text{ON}}/\Phi_{\text{OFF}}$ | Dynamic Intensity |
|------------------|-----------------------------|----------------------------|-----------------|---------------------------------------------------|--------|--------------------------------------|-------------------|
| ON <sup>a</sup>  | 577                         | 601                        | 7.85 ± 0.03     | 65000                                             | 0.15   | 8                                    | 9                 |
| OFF <sup>b</sup> | 573                         | 597                        |                 | 107500                                            | 0.019  |                                      |                   |

<sup>a</sup> Protonated form: pH 4

<sup>b</sup> Deprotonated form: pH 10

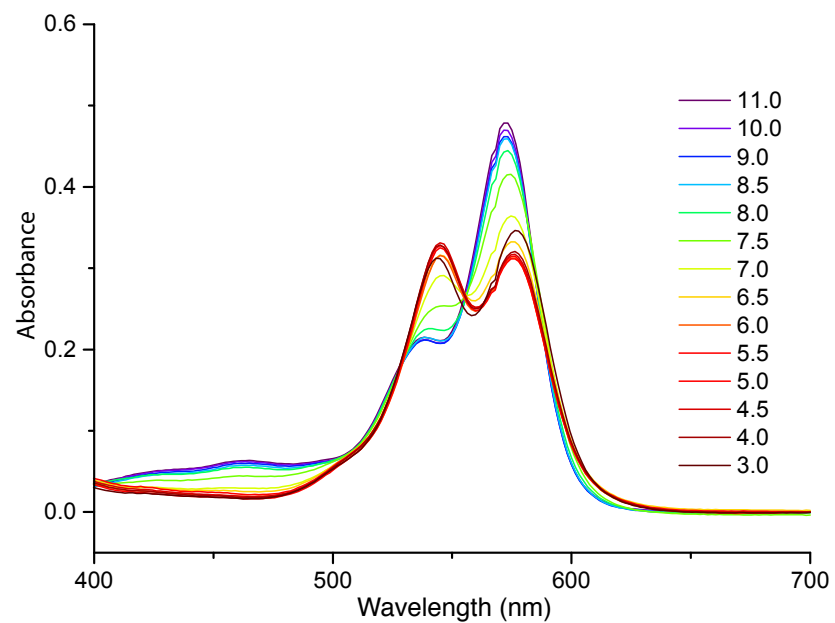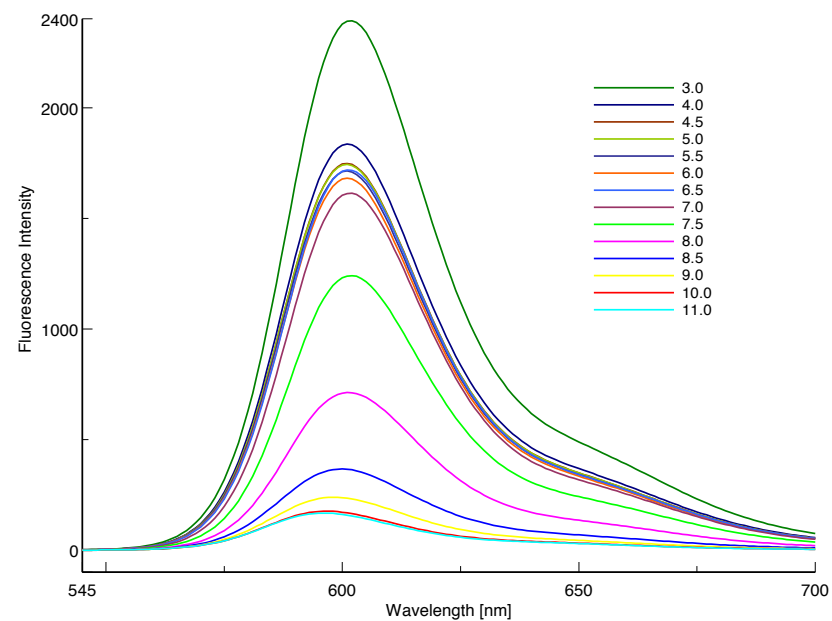

Left: Dependence of absorption on pH in a MOPS buffered aqueous solution. Right: Dependence of fluorescence intensity on pH in a MOPS buffered aqueous solution. Excitation at 535 nm.

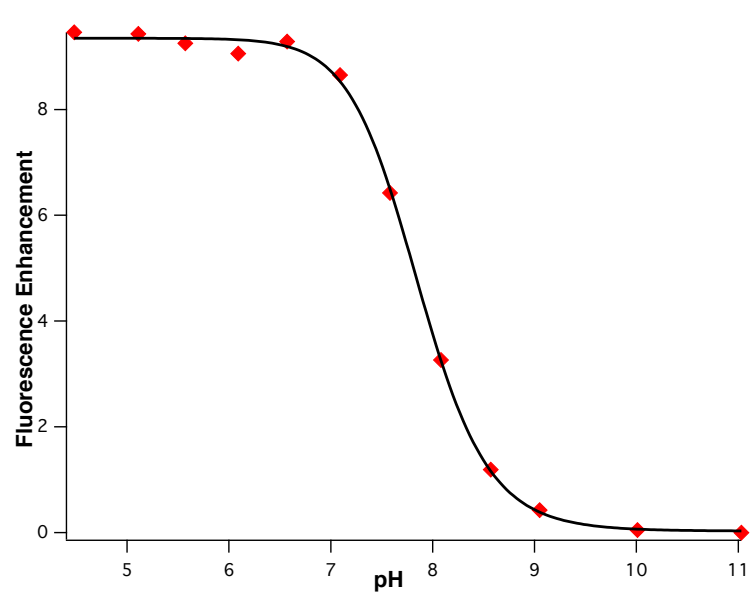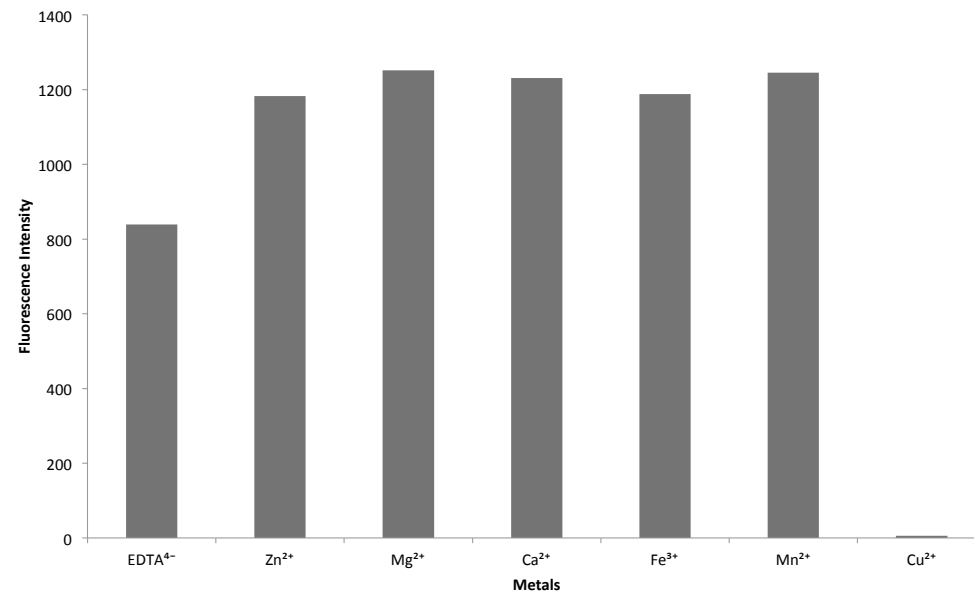

Left: Dependence of fluorescence enhancement on pH. Curve fitting was based on a modified Hill equation from which  $pK_a$  values were calculated. Right: Fluorescence intensities of the probe ( $5 \mu\text{M}$ ) to a range of metal ions in a MOPS buffer (MOPS 30 mM, KCl 100 mM, pH 7.2). The concentration of cations is  $10^{-3}$  M.

## HR- $\beta$ Ala

| State            | $\lambda_{\text{abs}}$ (nm) | $\lambda_{\text{em}}$ (nm) | pK <sub>a</sub> | $\epsilon$<br>(M <sup>-1</sup> cm <sup>-1</sup> ) | $\Phi$ | $\Phi_{\text{ON}}/\Phi_{\text{OFF}}$ | Dynamic Intensity |
|------------------|-----------------------------|----------------------------|-----------------|---------------------------------------------------|--------|--------------------------------------|-------------------|
| ON <sup>a</sup>  | 577                         | 602                        | N/A             | 128000                                            | 0.20   | 11                                   | 12                |
| OFF <sup>b</sup> | 572                         | 598                        |                 | 202000                                            | 0.018  |                                      |                   |

<sup>a</sup> Protonated form: pH 4  
<sup>b</sup> Deprotonated form: pH 10

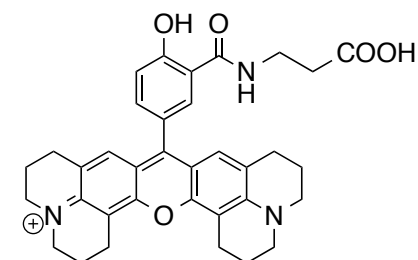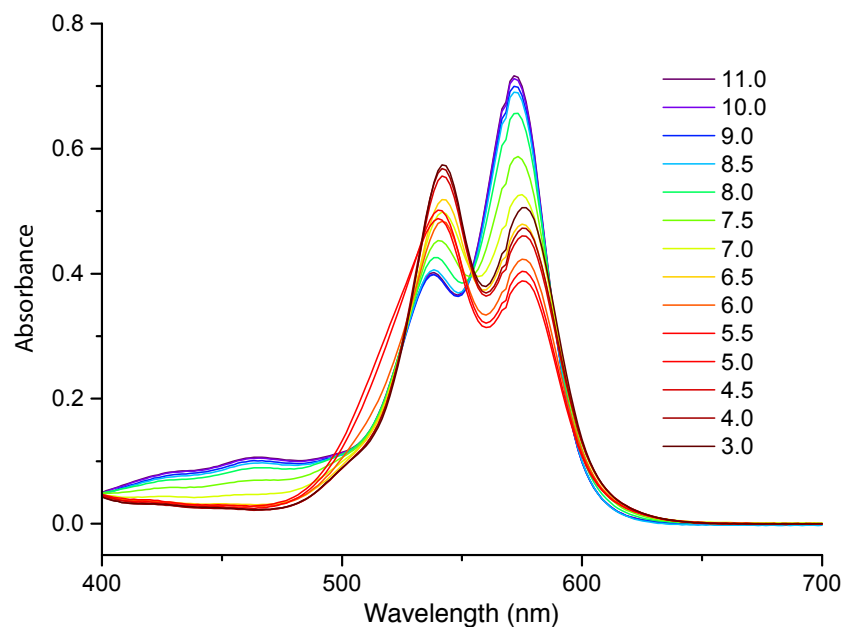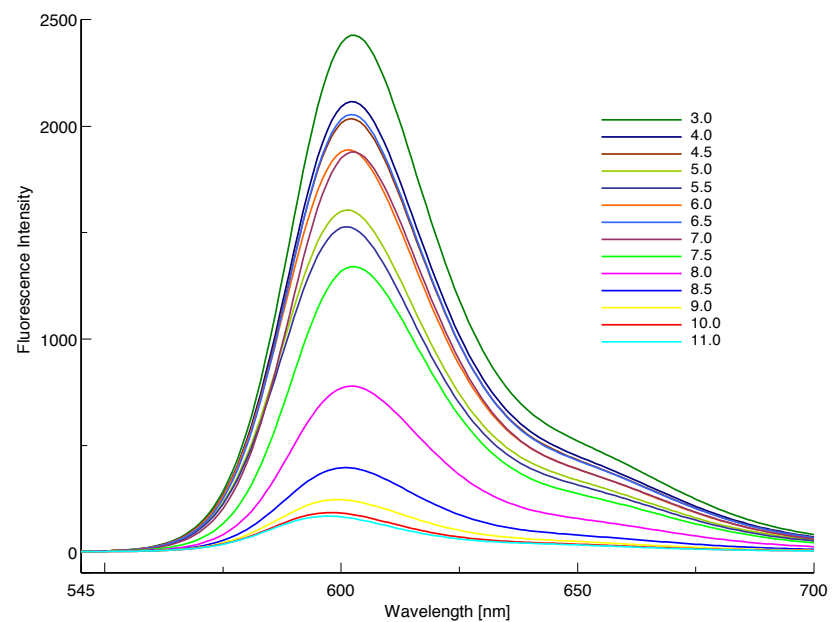

Left: Dependence of absorption on pH in a MOPS buffered aqueous solution. Right: Dependence of fluorescence intensity on pH in a MOPS buffered aqueous solution. Excitation at 535 nm.

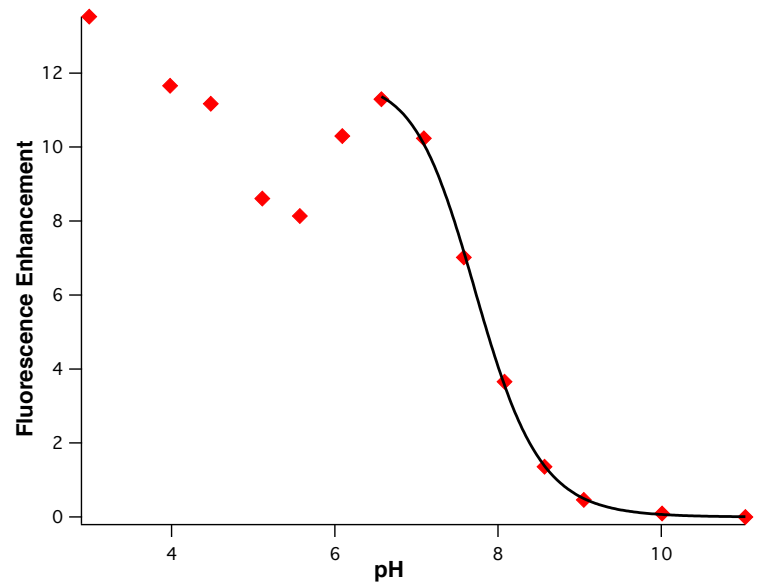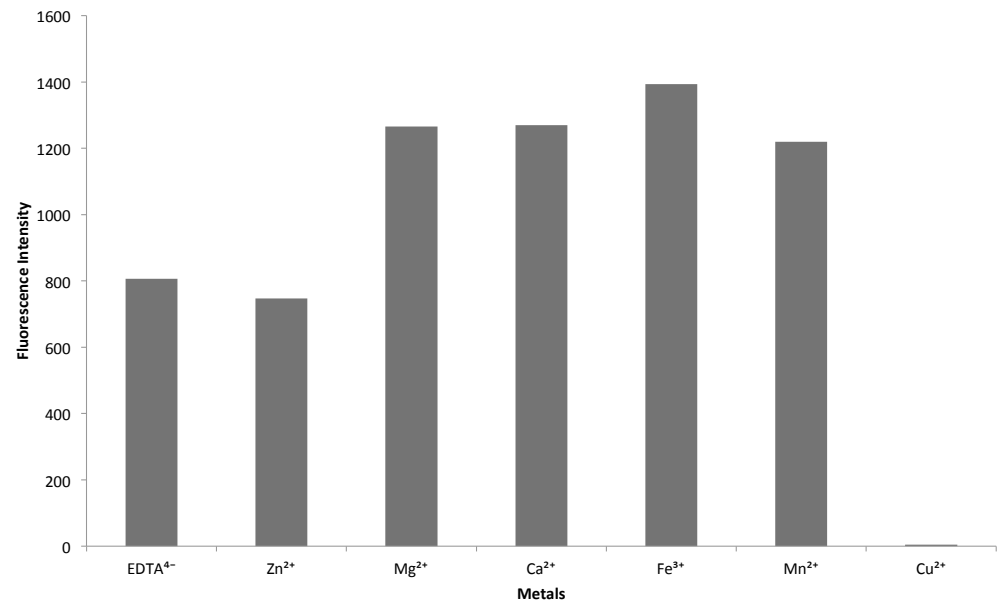

Left: Dependence of fluorescence enhancement on pH. Curve fitting was based on a modified Hill equation from which pK<sub>a</sub> values were calculated. Fluorescence intensities of the probe (5 μM) to a range of metal ions in a MOPS buffer (MOPS 30 mM, KCl 100 mM, pH 7.2). The concentration of cations is 10<sup>-3</sup> M.

### HR-PN<sub>3</sub>

| State            | $\lambda_{\text{abs}}$ (nm) | $\lambda_{\text{em}}$ (nm) | pK <sub>a</sub> | $\epsilon$<br>(M <sup>-1</sup> cm <sup>-1</sup> ) | $\Phi$ | $\Phi_{\text{ON}}/\Phi_{\text{OFF}}$ | Dynamic Intensity |
|------------------|-----------------------------|----------------------------|-----------------|---------------------------------------------------|--------|--------------------------------------|-------------------|
| ON <sup>a</sup>  | 578                         | 603                        | 6.20 ± 0.03     | 52500                                             | 0.41   | 21                                   | 21                |
| OFF <sup>b</sup> | 573                         | 597                        |                 | 0.02                                              |        |                                      |                   |

<sup>a</sup> Protonated form: pH 4

<sup>b</sup> Deprotonated form: pH 10

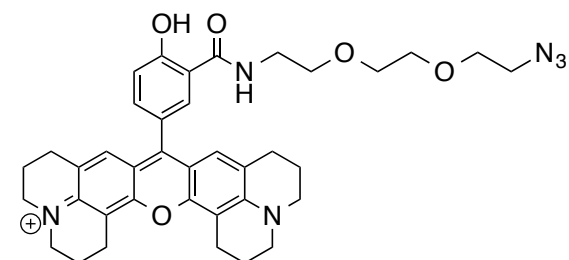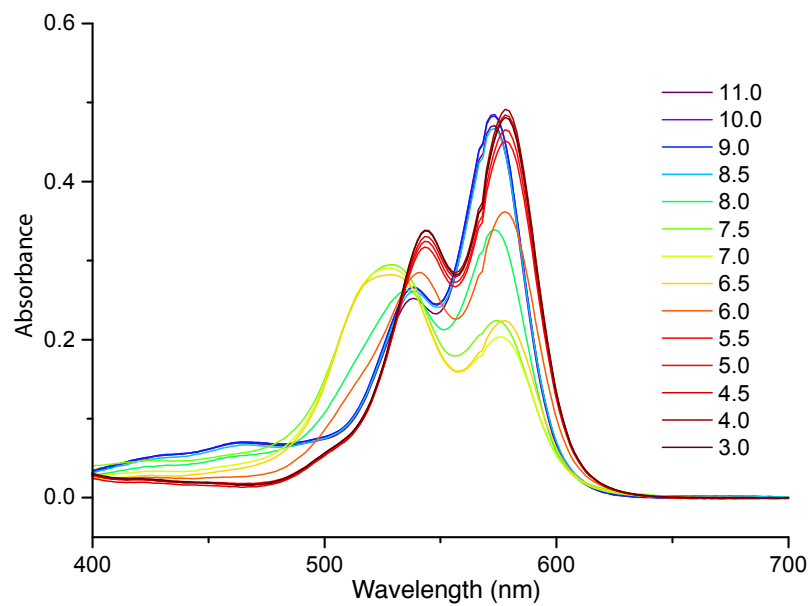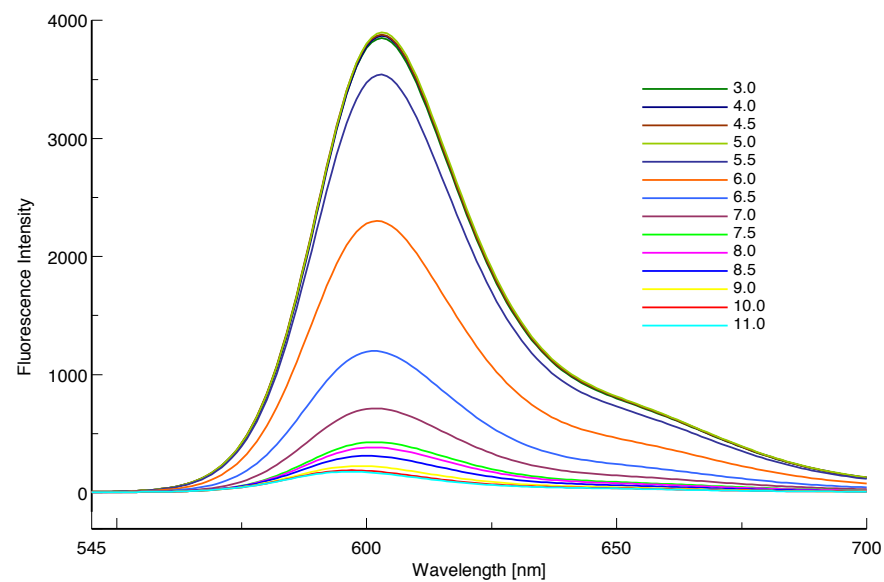

Left: Dependence of absorption on pH in a MOPS buffered aqueous solution. Right: Dependence of fluorescence intensity on pH in a MOPS buffered aqueous solution. Excitation at 535 nm.

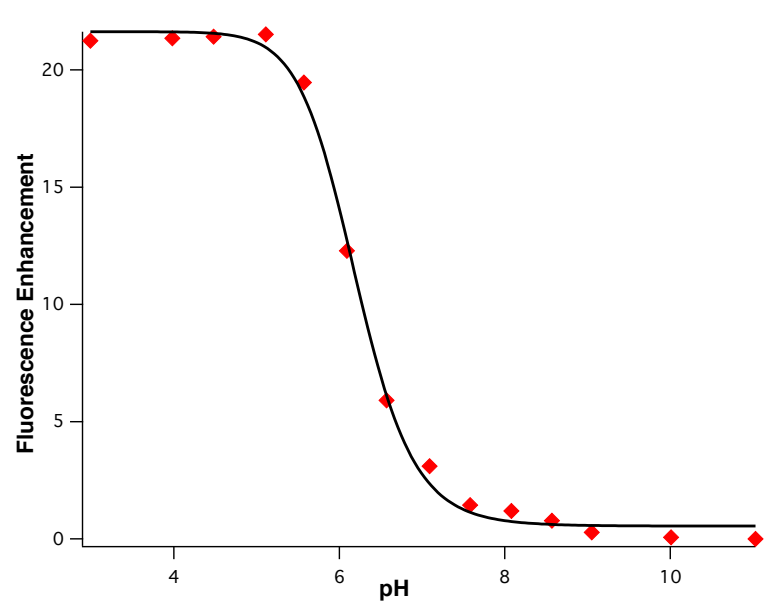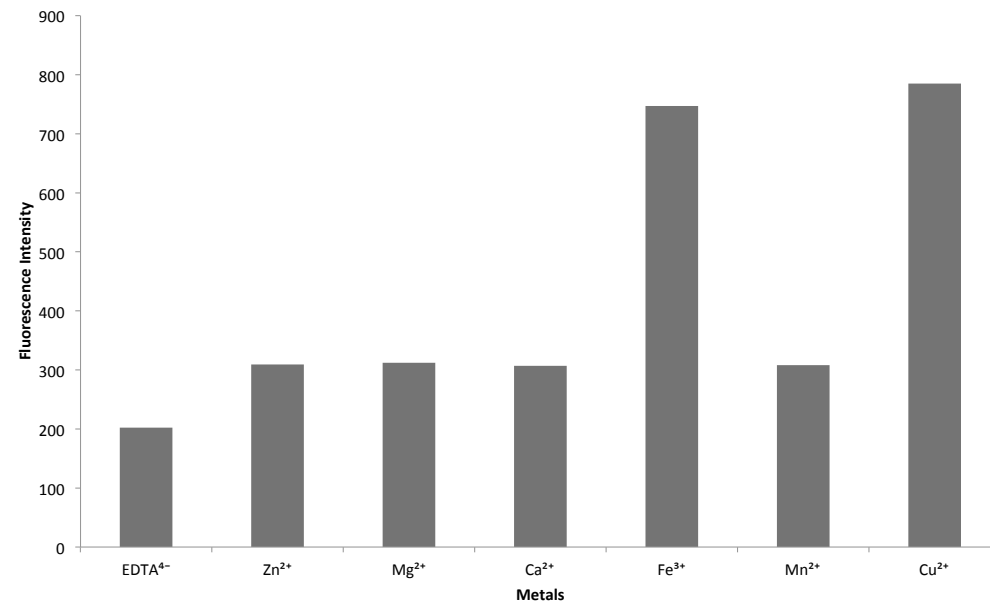

Left: Dependence of fluorescence enhancement on pH. Curve fitting was based on a modified Hill equation from which  $\text{pK}_a$  values were calculated. Right: Fluorescence intensities of the probe (5  $\mu\text{M}$ ) to a range of metal ions in a MOPS buffer (MOPS 30 mM, KCl 100 mM, pH 7.2). The concentration of cations is  $10^{-3}\text{M}$ .

## HR-CysA

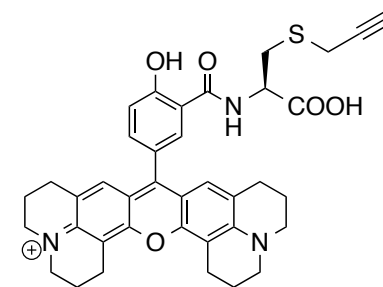

| State            | $\lambda_{\text{abs}}$ (nm) | $\lambda_{\text{em}}$ (nm) | pK <sub>a</sub> | $\epsilon$ (M <sup>-1</sup> cm <sup>-1</sup> ) | $\Phi$ | $\Phi_{\text{ON}}/\Phi_{\text{OFF}}$ | Dynamic Intensity |
|------------------|-----------------------------|----------------------------|-----------------|------------------------------------------------|--------|--------------------------------------|-------------------|
| ON <sup>a</sup>  | 577                         | 602                        | N/A             | 49000                                          | 0.09   | N/A                                  | N/A               |
| OFF <sup>b</sup> | 572                         | 597                        | N/A             | 123000                                         | 0.014  | N/A                                  | N/A               |

<sup>a</sup> Protonated form: pH 4

<sup>b</sup> Deprotonated form: pH 10

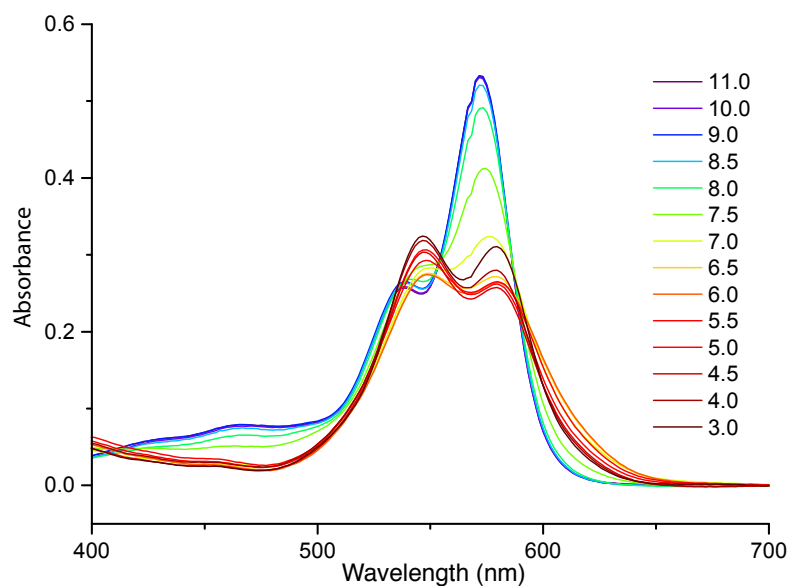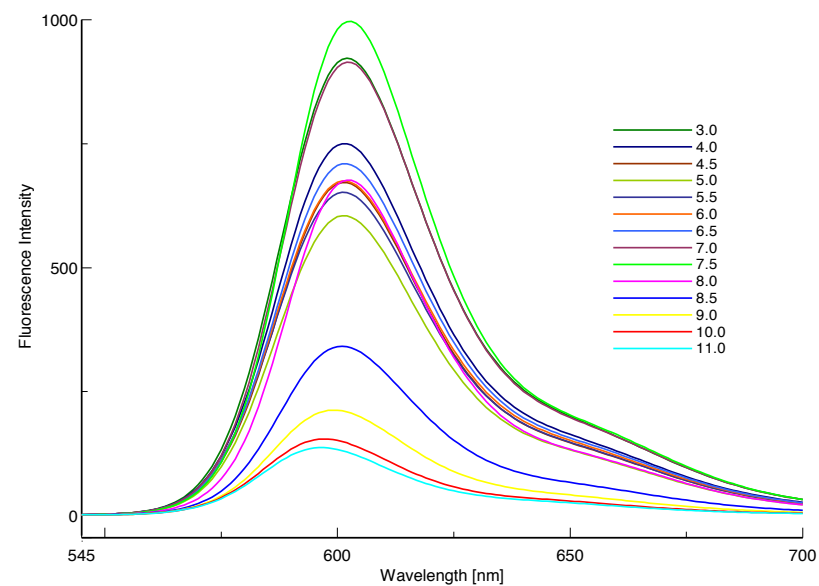

Left: Dependence of absorption on pH in a MOPS buffered aqueous solution. Right: Dependence of fluorescence intensity on pH in a MOPS buffered aqueous solution. Excitation at 535 nm.

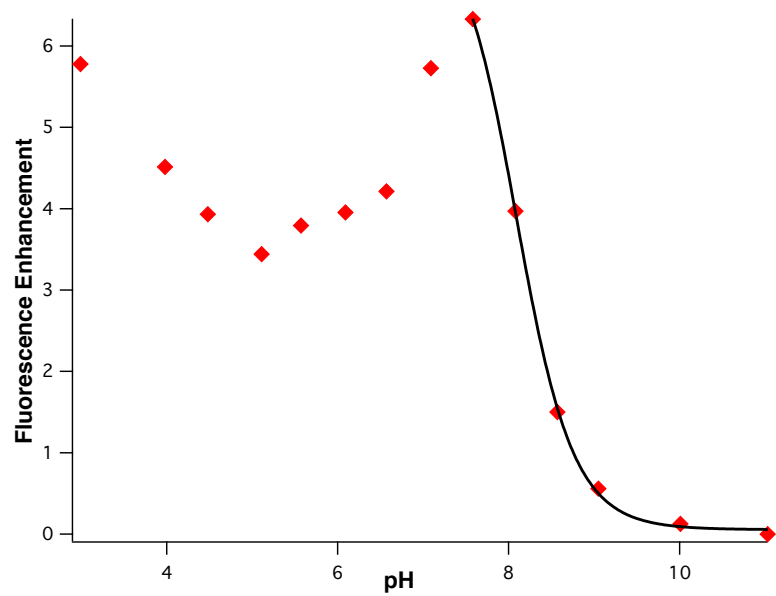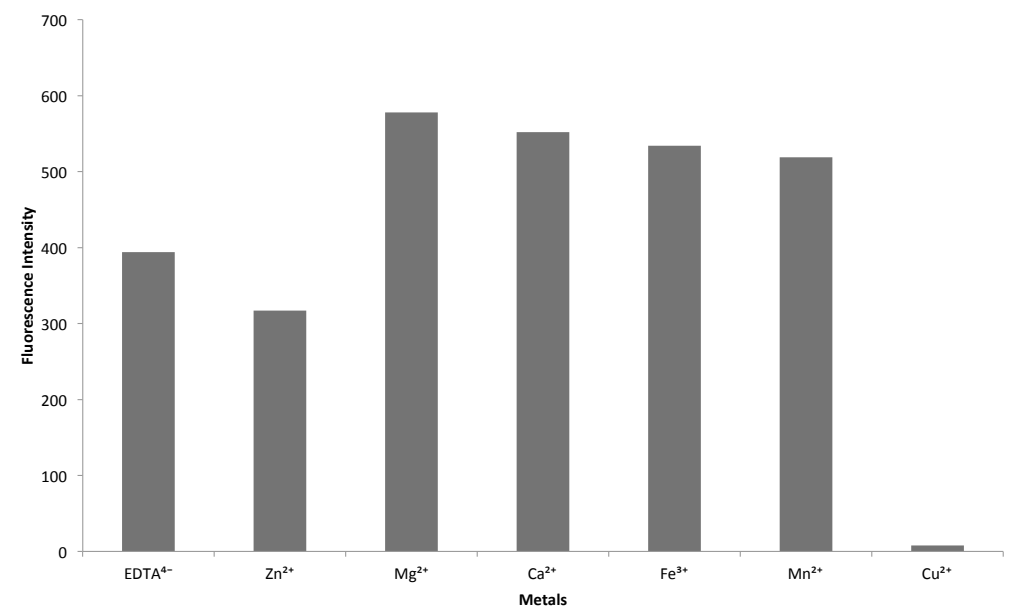

Left: Dependence of fluorescence enhancement on pH. Curve fitting was based on a modified Hill equation from which  $pK_a$  values were calculated. Right: Fluorescence intensities of the probe ( $5 \mu\text{M}$ ) to a range of metal ions in a MOPS buffer (MOPS 30 mM, KCl 100 mM, pH 7.2). The concentration of cations is  $10^{-3}$  M.



### HR-MPN<sub>3</sub>

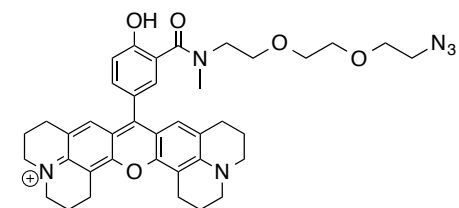

| State            | $\lambda_{\text{abs}}$ (nm) | $\lambda_{\text{em}}$ (nm) | pK <sub>a</sub> | $\epsilon$<br>(M <sup>-1</sup> cm <sup>-1</sup> ) | $\Phi$ | $\Phi_{\text{ON}}/\Phi_{\text{OFF}}$ | Dynamic Intensity |
|------------------|-----------------------------|----------------------------|-----------------|---------------------------------------------------|--------|--------------------------------------|-------------------|
| ON <sup>a</sup>  | 578                         | 605                        | 8.00 ± 0.03     | 162000                                            | 0.65   | 65                                   | 78                |
| OFF <sup>b</sup> | 573                         | 603                        |                 | 162000                                            | 0.01   |                                      |                   |

<sup>a</sup> Protonated form: pH 4

<sup>b</sup> Deprotonated form: pH 11

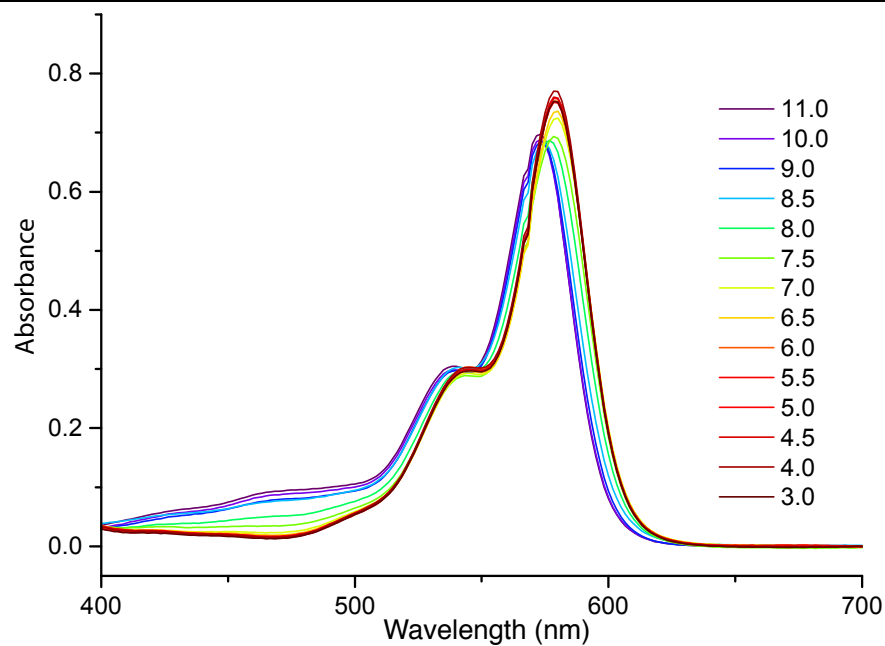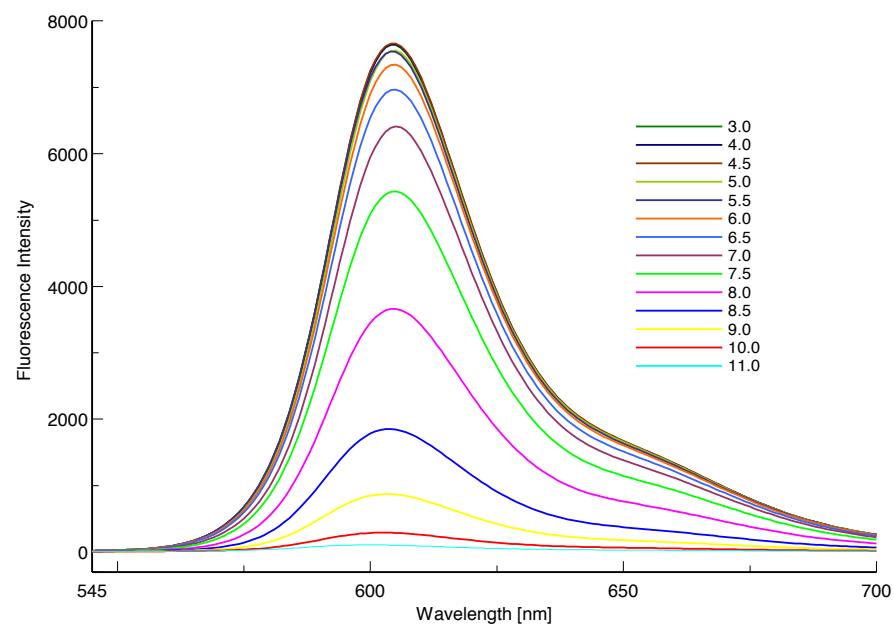

Left: Dependence of absorption on pH in a MOPS buffered aqueous solution. Right: Dependence of fluorescence intensity on pH in a MOPS buffered aqueous solution. Excitation at 535 nm.

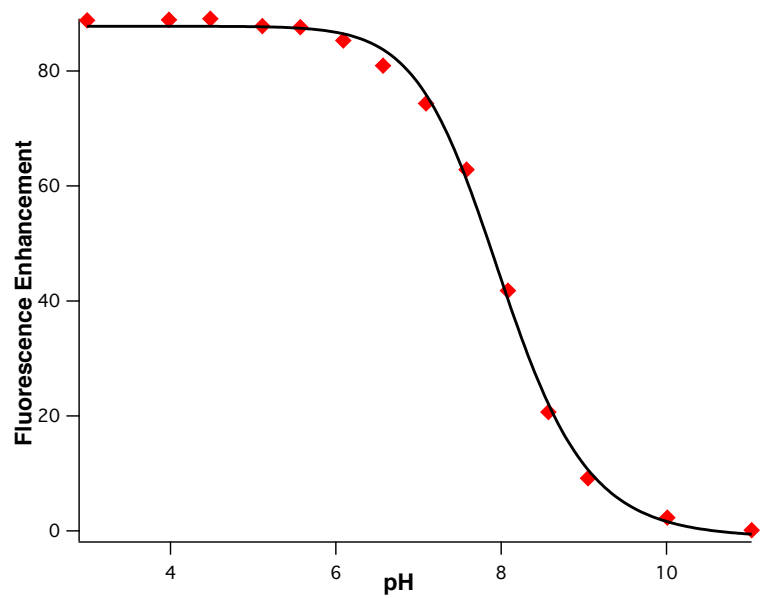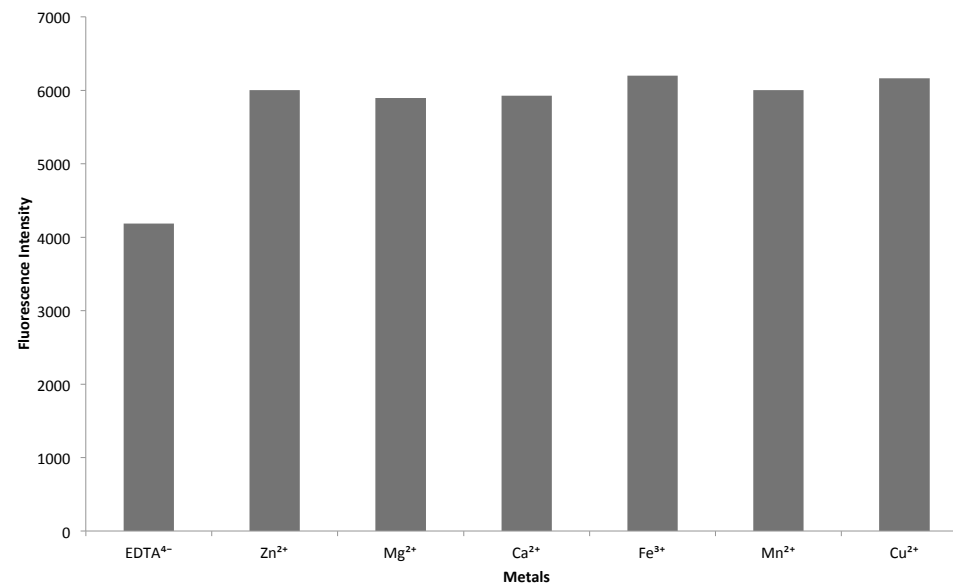

Left: Dependence of fluorescence enhancement on pH. Curve fitting was based on a modified Hill equation from which  $pK_a$  values were calculated. Right: Fluorescence intensities of the probe (5  $\mu$ M) to a range of metal ions in a MOPS buffer (MOPS 30 mM, KCl 100 mM, pH 7.2). The concentration of cations is  $10^{-3}$  M.

## HR-LysA

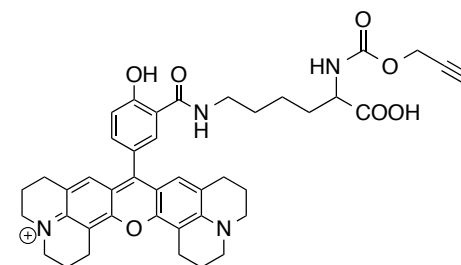

| State            | $\lambda_{\text{abs}}$ (nm) | $\lambda_{\text{em}}$ (nm) | pK <sub>a</sub> | $\epsilon$ (M <sup>-1</sup> cm <sup>-1</sup> ) | $\Phi$ | $\Phi_{\text{ON}}/\Phi_{\text{OFF}}$ | Dynamic Intensity |
|------------------|-----------------------------|----------------------------|-----------------|------------------------------------------------|--------|--------------------------------------|-------------------|
| ON <sup>a</sup>  | 577                         | 602                        | 7.51 ± 0.04     | 57000                                          | 0.25   | 13                                   | 13                |
| OFF <sup>b</sup> | 572                         | 596                        |                 | 93000                                          | 0.02   |                                      |                   |

<sup>a</sup> Protonated form: pH 4

<sup>b</sup> Deprotonated form: pH 10

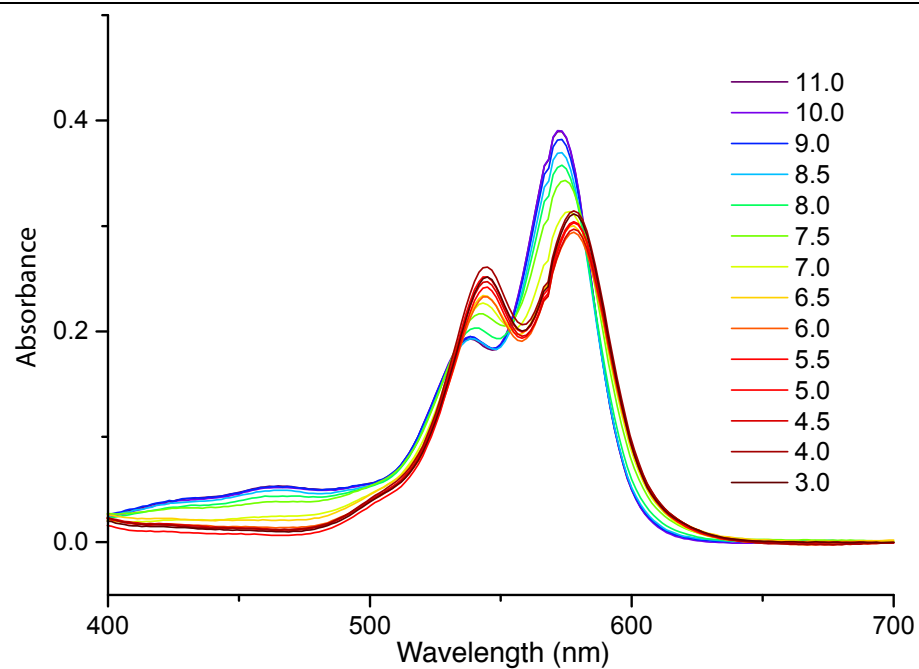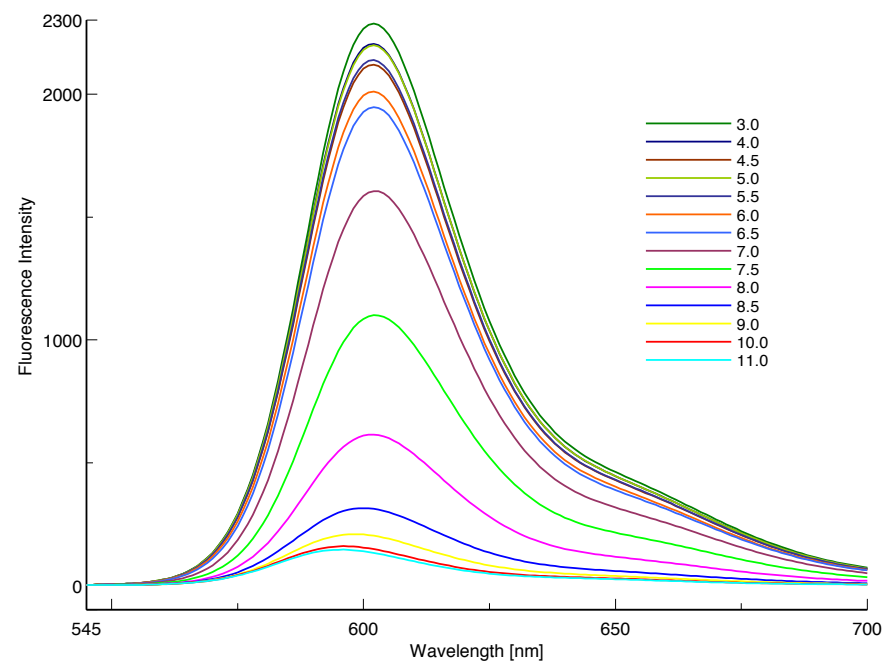

Left: Dependence of absorption on pH in a MOPS buffered aqueous solution. Right: Dependence of fluorescence intensity on pH in a MOPS buffered aqueous solution. Excitation at 535 nm.

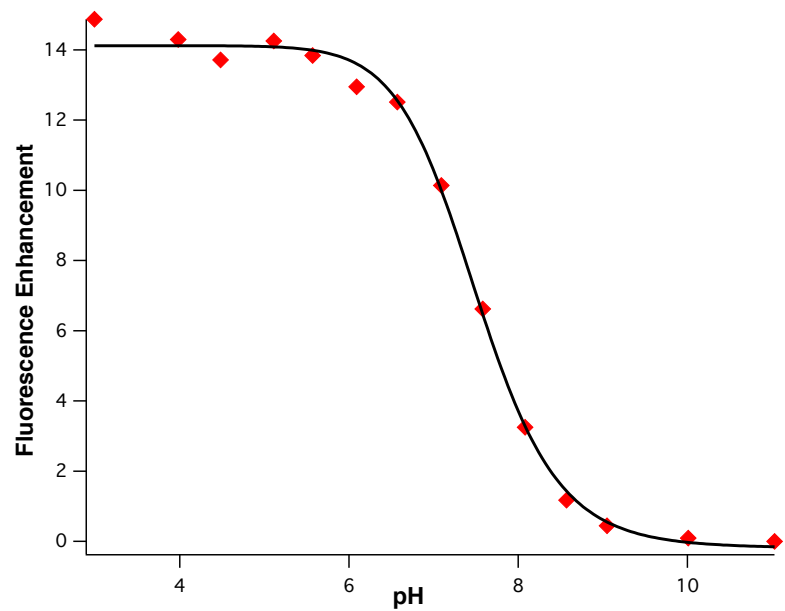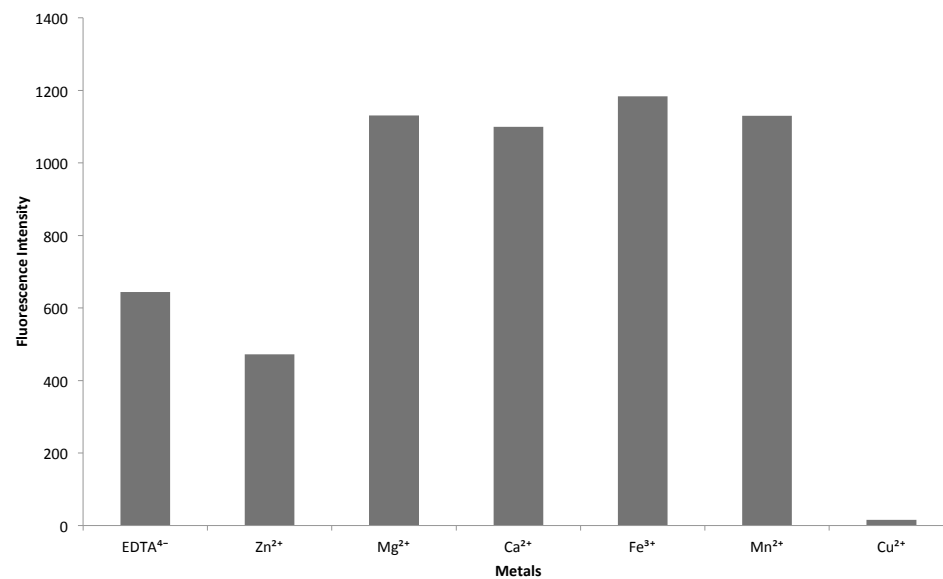

Left: Dependence of fluorescence enhancement on pH. Curve fitting was based on a modified Hill equation from which  $pK_a$  values were calculated. Right: Fluorescence intensities of the probe ( $5 \mu\text{M}$ ) to a range of metal ions in a MOPS buffer (MOPS 30 mM, KCl 100 mM, pH 7.2). The concentration of cations is  $10^{-3}$  M.

## HR-PA

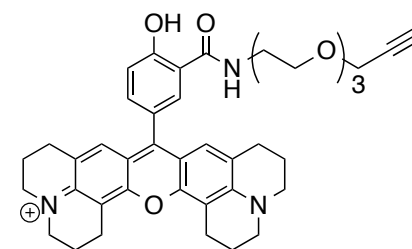

| State            | $\lambda_{\text{abs}}$ (nm) | $\lambda_{\text{em}}$ (nm) | pK <sub>a</sub> | $\epsilon$<br>(M <sup>-1</sup> cm <sup>-1</sup> ) | $\Phi$ | $\Phi_{\text{ON}}/\Phi_{\text{OFF}}$ | Dynamic Intensity |
|------------------|-----------------------------|----------------------------|-----------------|---------------------------------------------------|--------|--------------------------------------|-------------------|
| ON <sup>a</sup>  | 580                         | 602                        | 6.89 ± 0.04     | 75500                                             | 0.46   | 1150                                 | 31                |
| OFF <sup>b</sup> | 573                         | 596                        |                 | 72500                                             | 0.0004 |                                      |                   |

<sup>a</sup> Protonated form: pH 4

<sup>b</sup> Deprotonated form: pH 11

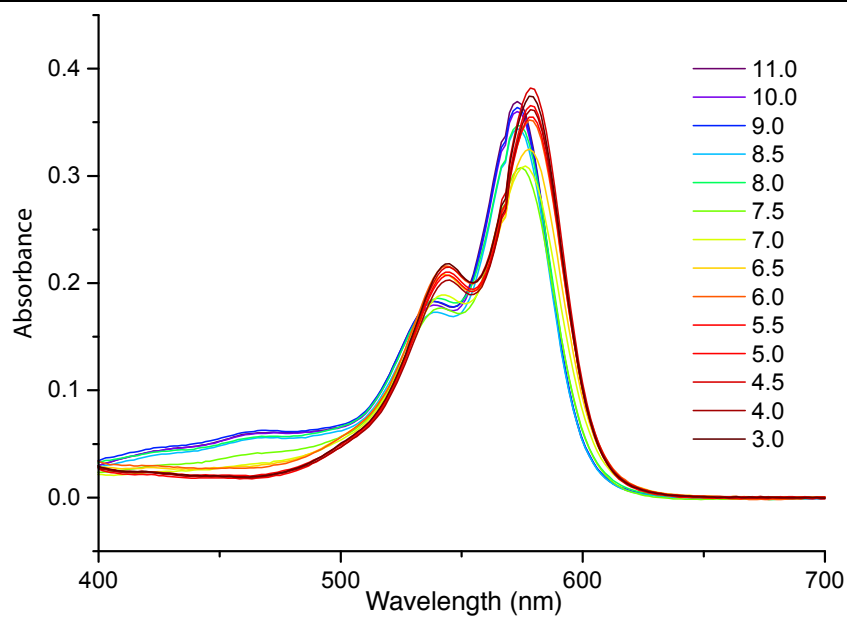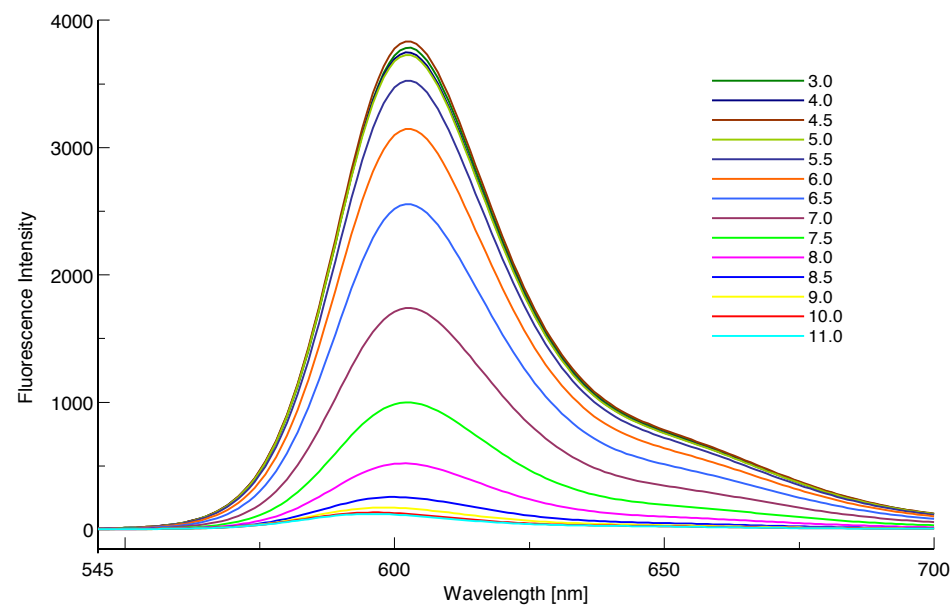

Left: Dependence of absorption on pH in a MOPS buffered aqueous solution. Right: Dependence of fluorescence intensity on pH in a MOPS buffered aqueous solution. Excitation at 535 nm.

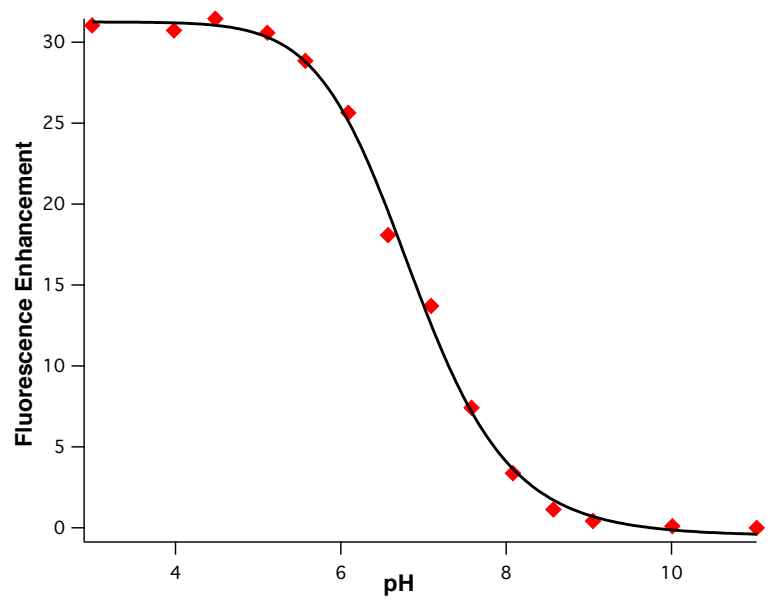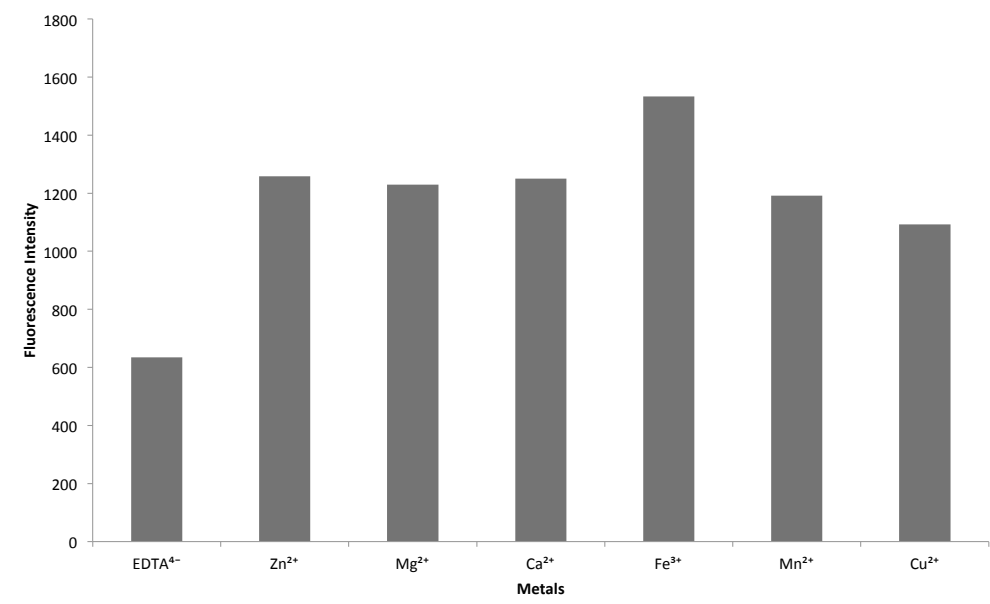

Left: Dependence of fluorescence enhancement on pH. Curve fitting was based on a modified Hill equation from which  $pK_a$  values were calculated. Right: Fluorescence intensities of the probe ( $5 \mu\text{M}$ ) to a range of metal ions in a MOPS buffer (MOPS 30 mM, KCl 100 mM, pH 7.2). The concentration of cations is  $10^{-3}$  M.

## HR-LysF

| State            | $\lambda_{\text{abs}}$ (nm) | $\lambda_{\text{em}}$ (nm) | pK <sub>a</sub> | $\epsilon$<br>(M <sup>-1</sup> cm <sup>-1</sup> ) | $\Phi$ | $\Phi_{\text{ON}}/\Phi_{\text{OFF}}$ | Dynamic Intensity |
|------------------|-----------------------------|----------------------------|-----------------|---------------------------------------------------|--------|--------------------------------------|-------------------|
| ON <sup>a</sup>  | 583                         | 607                        | 4.84 ± 0.10     | 54500                                             | 0.11   | 37                                   | 45                |
| OFF <sup>b</sup> | 580                         | 600                        |                 | 46000                                             | 0.003  |                                      |                   |

<sup>a</sup> Protonated form: pH 2

<sup>b</sup> Deprotonated form: pH 8

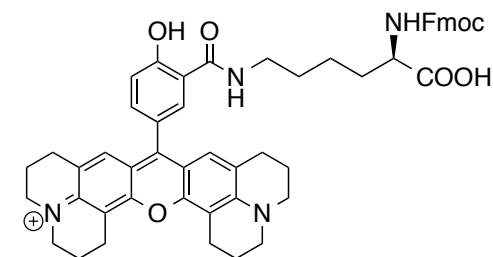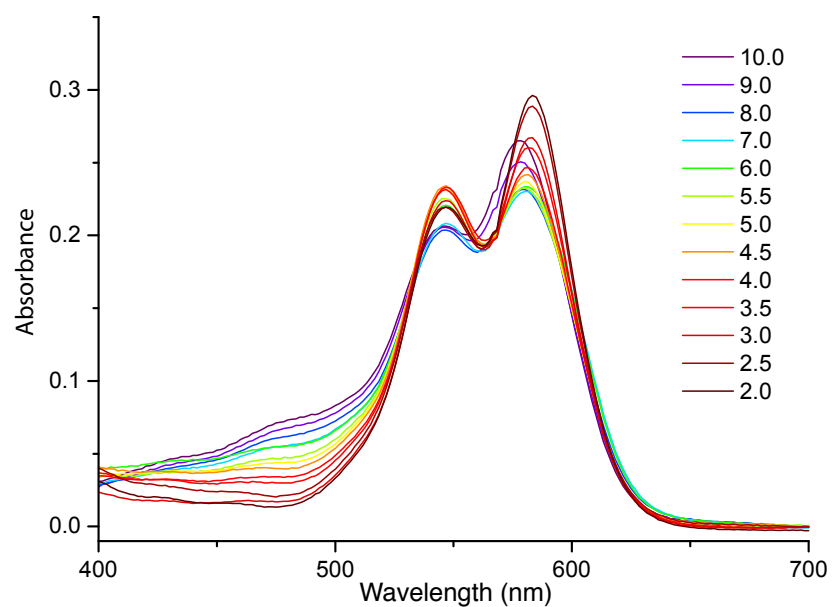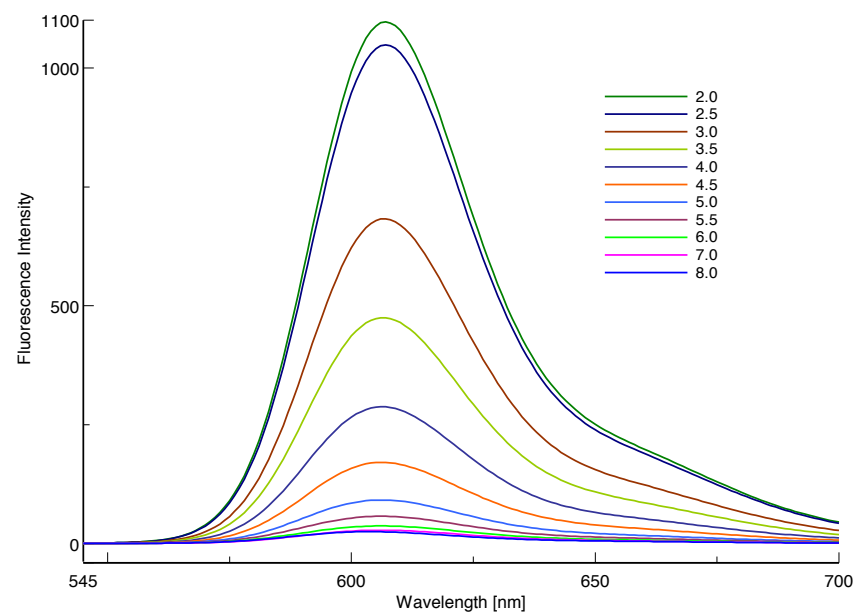

Left: Dependence of absorption on pH in a MOPS buffered aqueous solution. Right: Dependence of fluorescence intensity on pH in a MOPS buffered aqueous solution. Excitation at 535 nm.

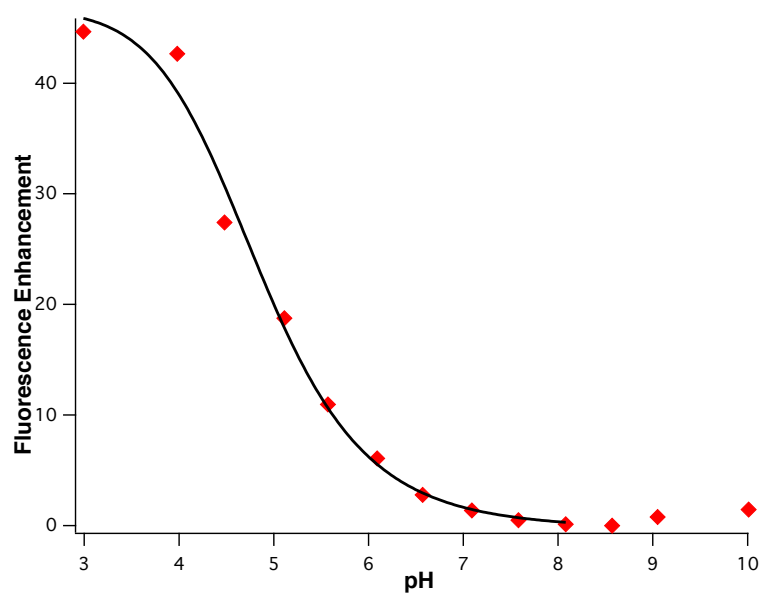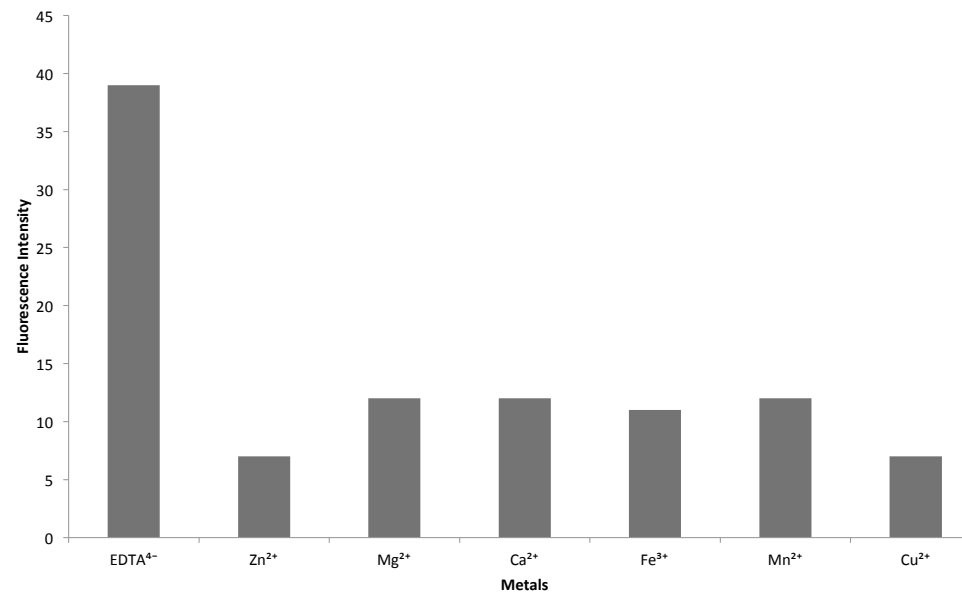

Left: Dependence of fluorescence enhancement on pH. Curve fitting was based on a modified Hill equation from which  $pK_a$  values were calculated. Right: Fluorescence intensities of the probe ( $5 \mu\text{M}$ ) to a range of metal ions in a MOPS buffer (MOPS 30 mM, KCl 100 mM, pH 7.2). The concentration of cations is  $10^{-3}$  M.



## HR-PN<sub>3</sub> Dextran 40,000 conjugate

| State            | $\lambda_{\text{abs}}$ (nm) | $\lambda_{\text{em}}$ (nm) | $\text{pK}_a$   | $\epsilon$<br>( $\text{M}^{-1} \text{cm}^{-1}$ ) | $\Phi$              | $\Phi_{\text{ON}}/\Phi_{\text{OFF}}$ | Dynamic Intensity |
|------------------|-----------------------------|----------------------------|-----------------|--------------------------------------------------|---------------------|--------------------------------------|-------------------|
| ON <sup>a</sup>  | 583                         | 603                        | $6.77 \pm 0.02$ | –                                                | $0.167 \pm 0.021$   | 19                                   | 17                |
| OFF <sup>b</sup> | 573                         | 597                        |                 | –                                                | $0.009 \pm 0.00001$ |                                      |                   |

<sup>a</sup> Protonated form: pH 4  
<sup>b</sup> Deprotonated form: pH 10

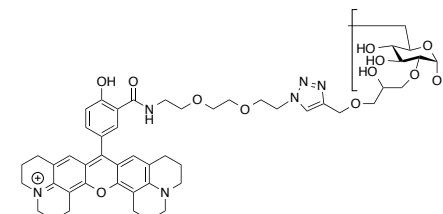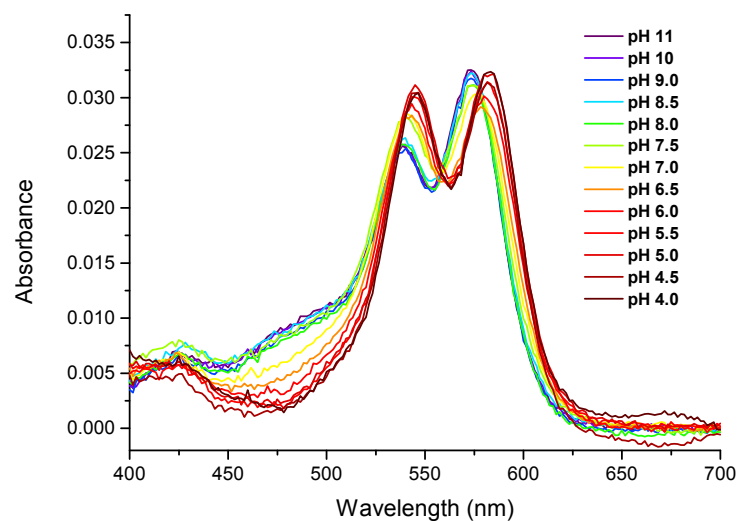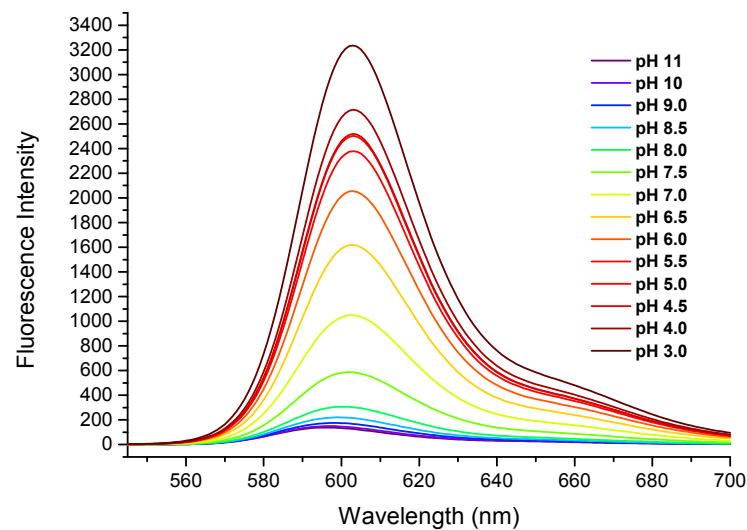

Left: Dependence of absorption on pH in a MOPS buffered aqueous solution. Right: Dependence of fluorescence intensity on pH in a MOPS buffered aqueous solution. Excitation at 535 nm.

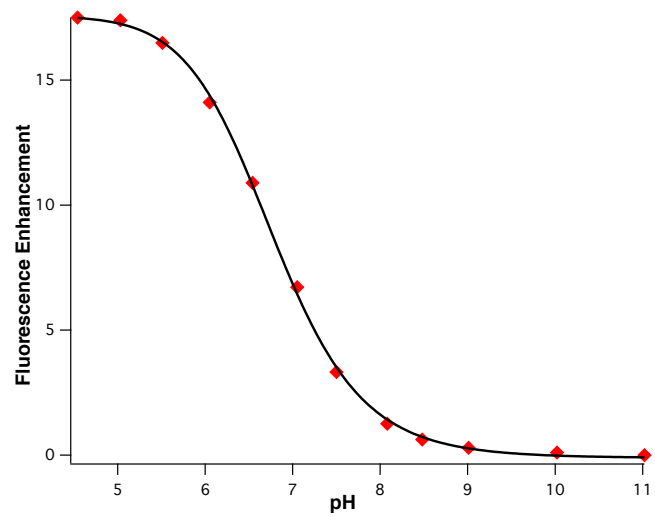

Dependence of fluorescence enhancement on pH. Curve fitting was based on a modified Hill equation from which  $pK_a$  values were calculated.
