# Supplementary material for: H-Rubies, a new family of red emitting fluorescent pH sensors for living cells
Source: PubMed Central journal article supplement (PMC5950754; doi:10.1039/c5sc01113b), 2015-07-14
Supplement: SC-006-C5SC01113B-s003.pdf [file SC-006-C5SC01113B-s003.pdf]

## **H-Rubies, a New Family of Red Emitting Fluorescent pH sensors for Living Cells**

Guillaume Despras<sup>+</sup>, Alsu Zamaleeva<sup>+</sup>, Lucie Dradevet, Céline Tisseyre, Joao Gamelas Magalhaes, Charlotte Garner, Michel De Waard, Sebastian Amigorena, Anne Feltz, Jean-Maurice Mallet, Mayeul Collot\*

### **Supplementary information**

NMR and Mass spectra

**NMR and mass spectra of non phenolic X-rhodamines and intermediates**  
**HRMS of the first set of H-Rubies**  
**NMR spectra of functionalisable H-Rubies and their intermediates**  
**HRMS spectra of functionalisable H-Rubies and their intermediates**

# NMR and mass spectra of non phenolic X-rhodamines and intermediates

C:\Xcalibur\data\Analyses\H-00399  
MeOH

12/02/14 19:18:42

DESPRAS Guillaume MC506

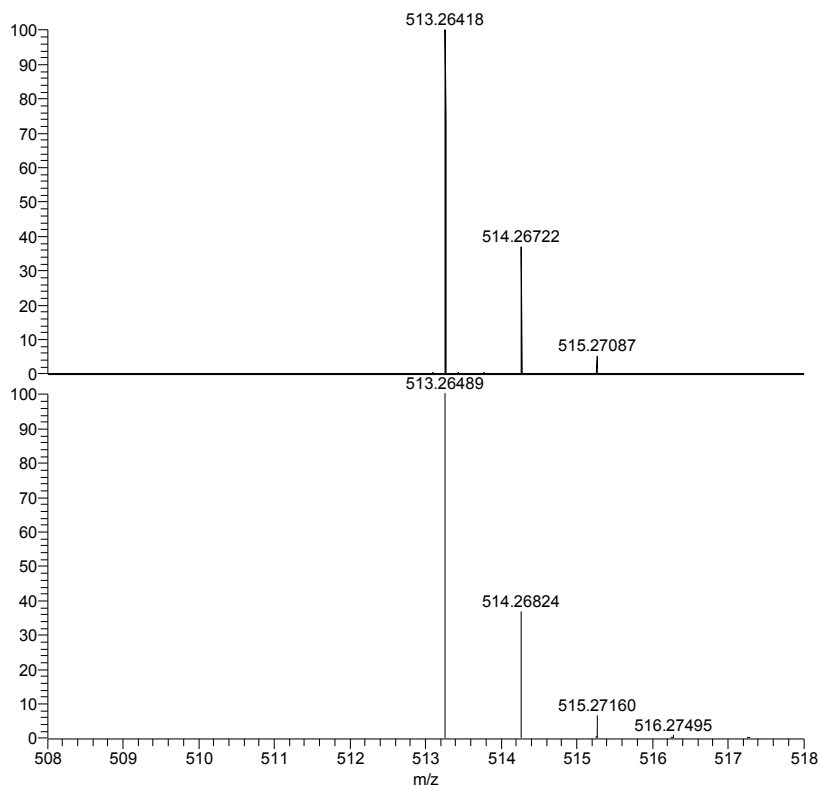

NL:  
3.55E7  
H-00399#12-18  
RT: 0.29-0.46 AV:  
7 T: FTMS + p ESI  
Full ms  
[110.00-1500.00]

NL:  
6.79E5  
C<sub>34</sub> H<sub>33</sub> N<sub>4</sub> O:  
C<sub>34</sub> H<sub>33</sub> N<sub>4</sub> O<sub>1</sub>  
pa Chrg 1

HRMS Spectrum of Imidazole Based X-Rhodamine

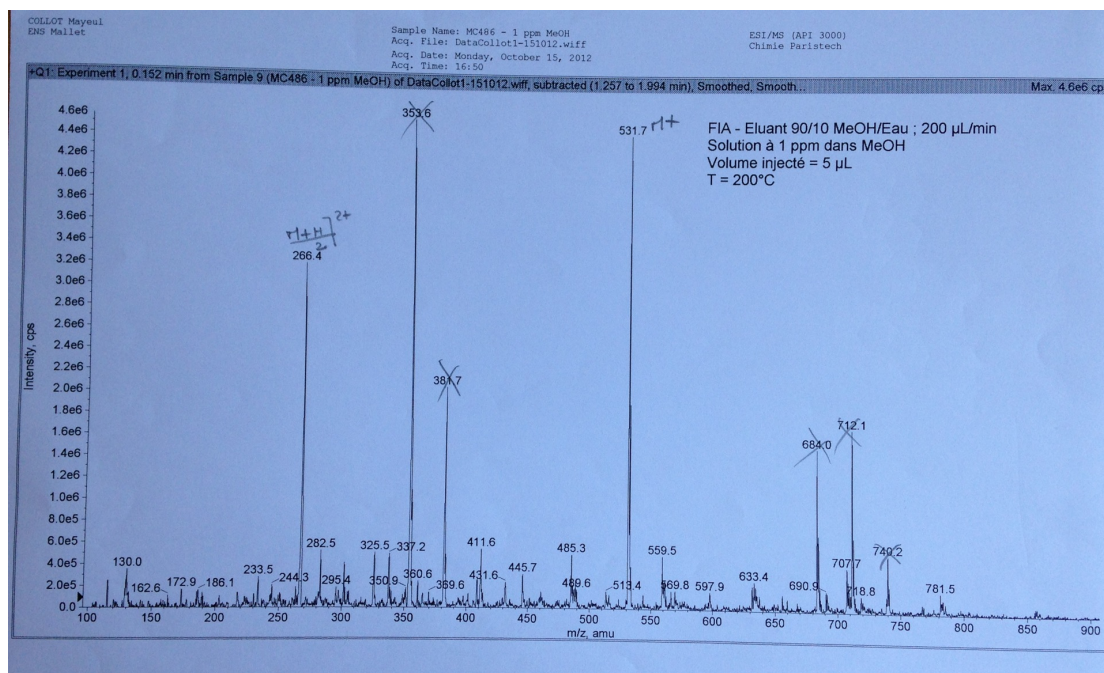

MS Spectrum of Pip-H

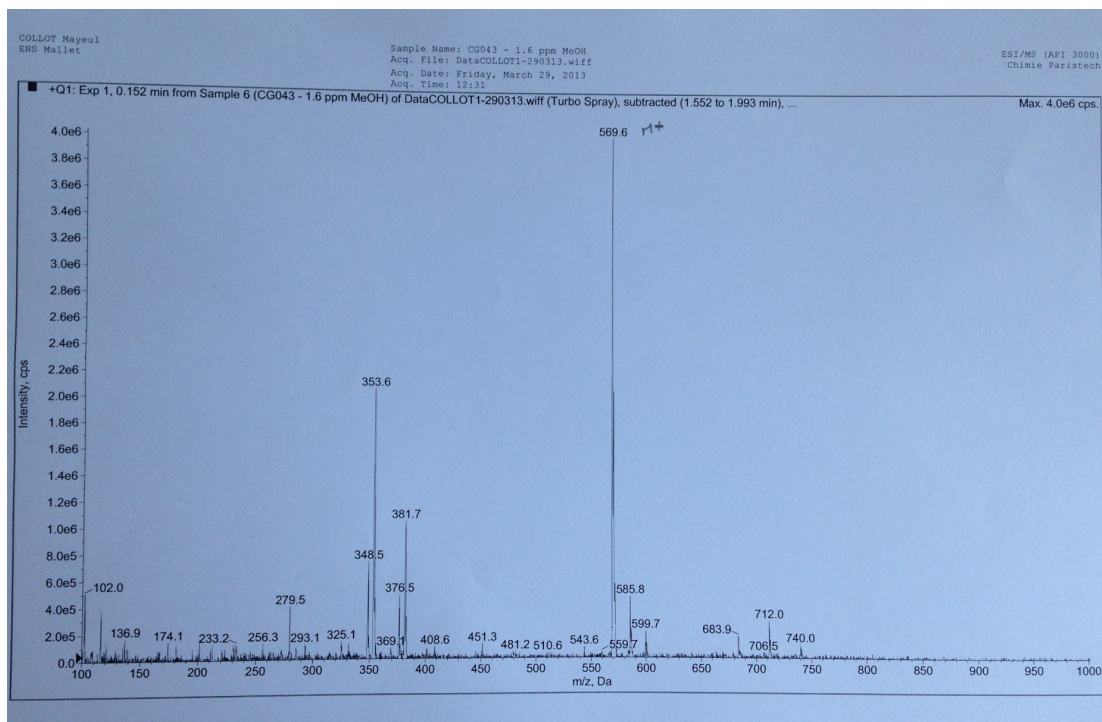

MS Spectrum of Pip-Alkyne

C:\xcalibur\data\Analyses\H-00395  
MeOH

12/02/14 18:57:18

DESPRAS Guillaume CG043

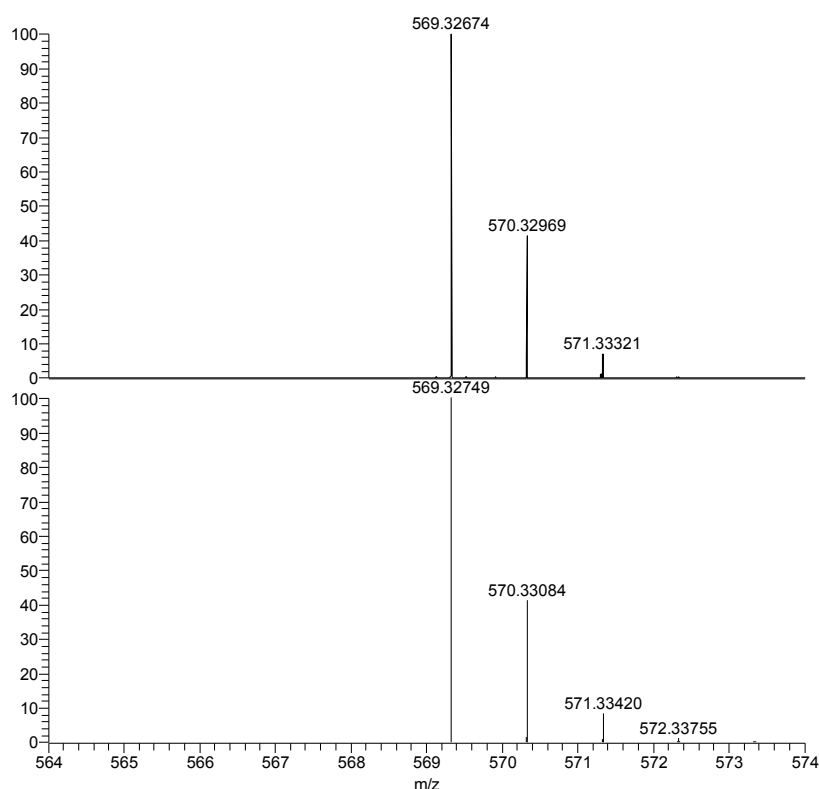

HRMS Spectrum of Pip-Alkyne

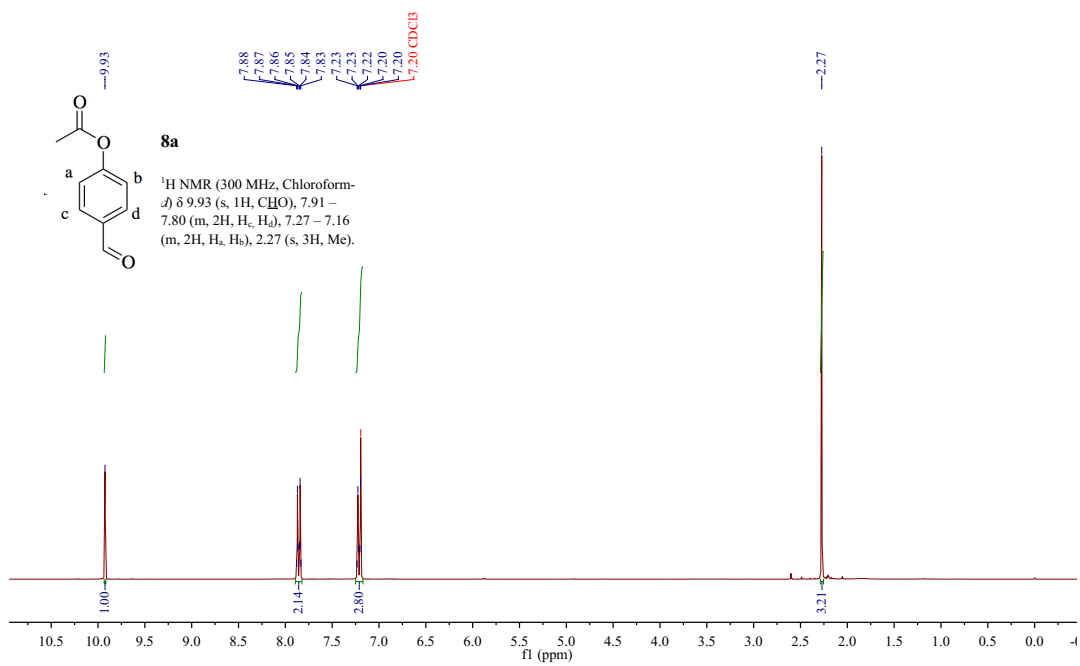

$^1\text{H NMR}$  spectrum of **4-formylphenyl acetate**

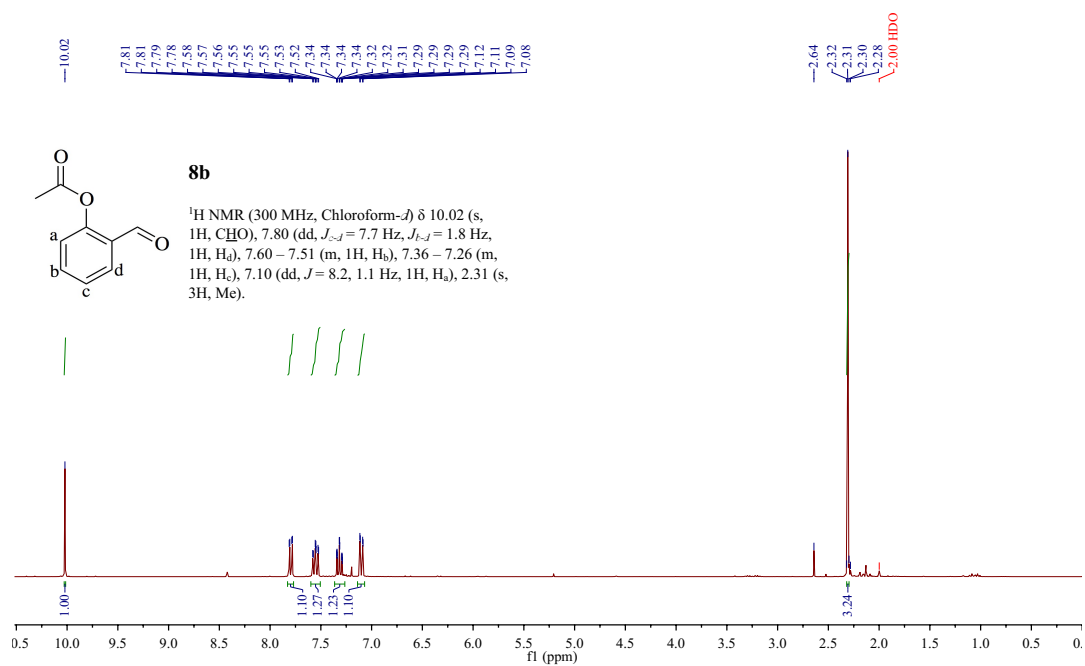

$^1\text{H NMR}$  spectrum of **2-formylphenyl acetate**

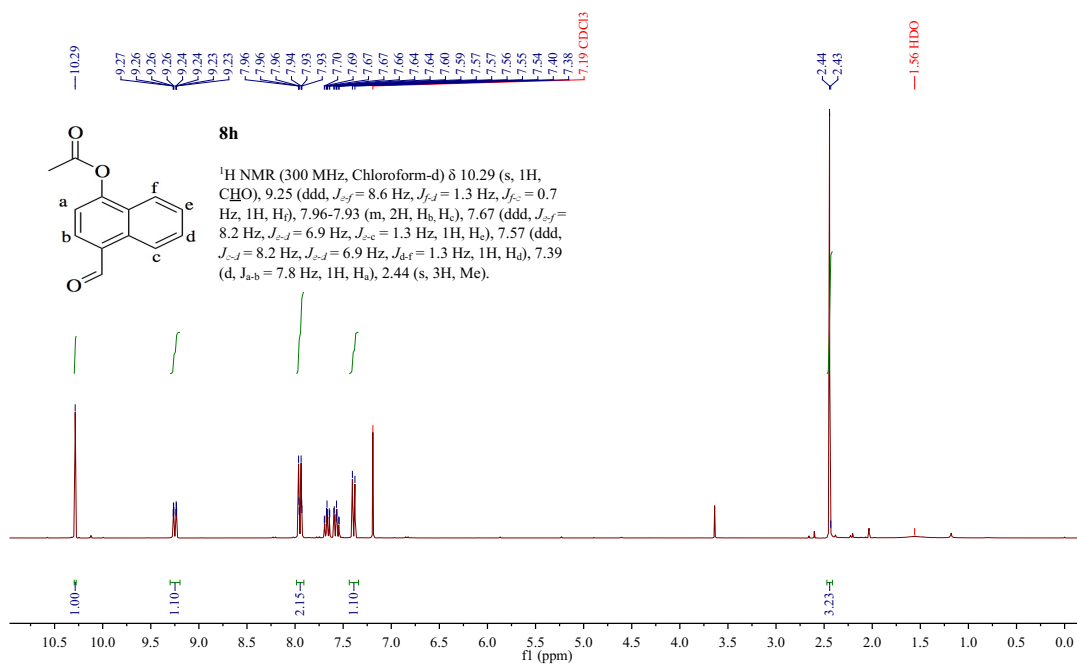

<sup>1</sup>H NMR spectrum of 4-formylnaphthalen-1-yl acetate

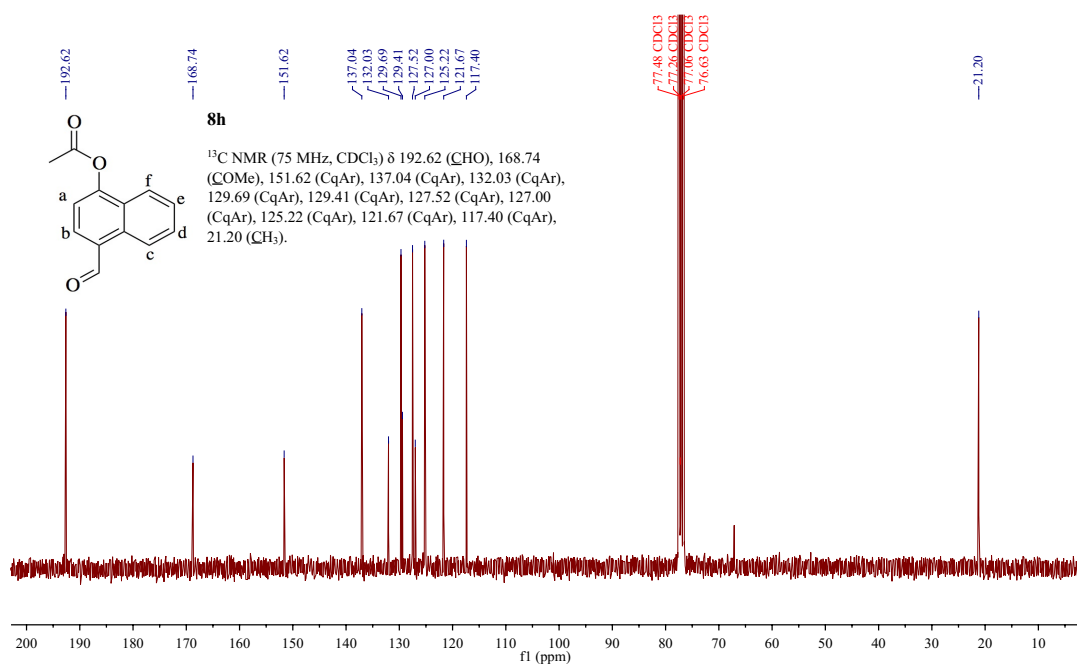

<sup>13</sup>C NMR spectrum of 4-formylnaphthalen-1-yl acetate

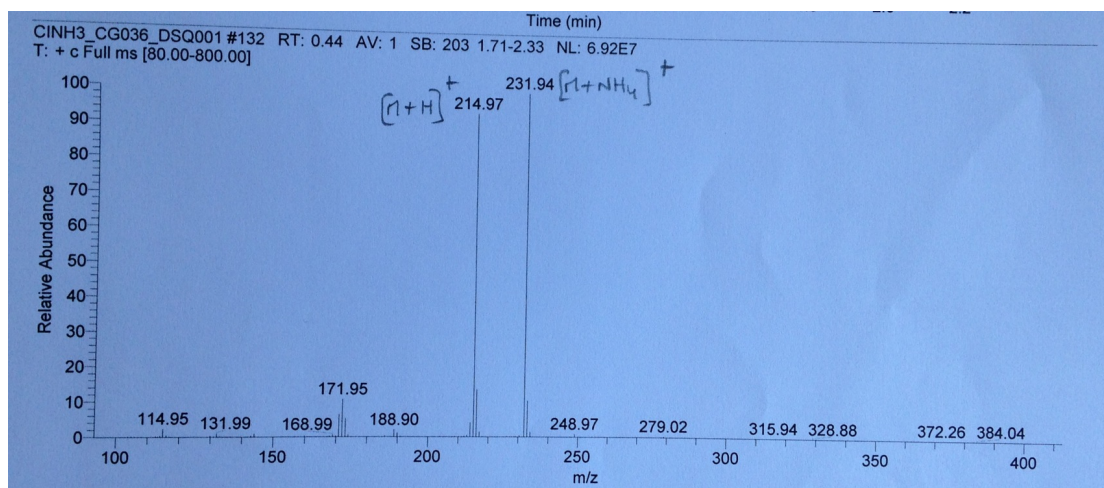

MS Spectrum of 4-formylnaphthalen-1-yl acetate

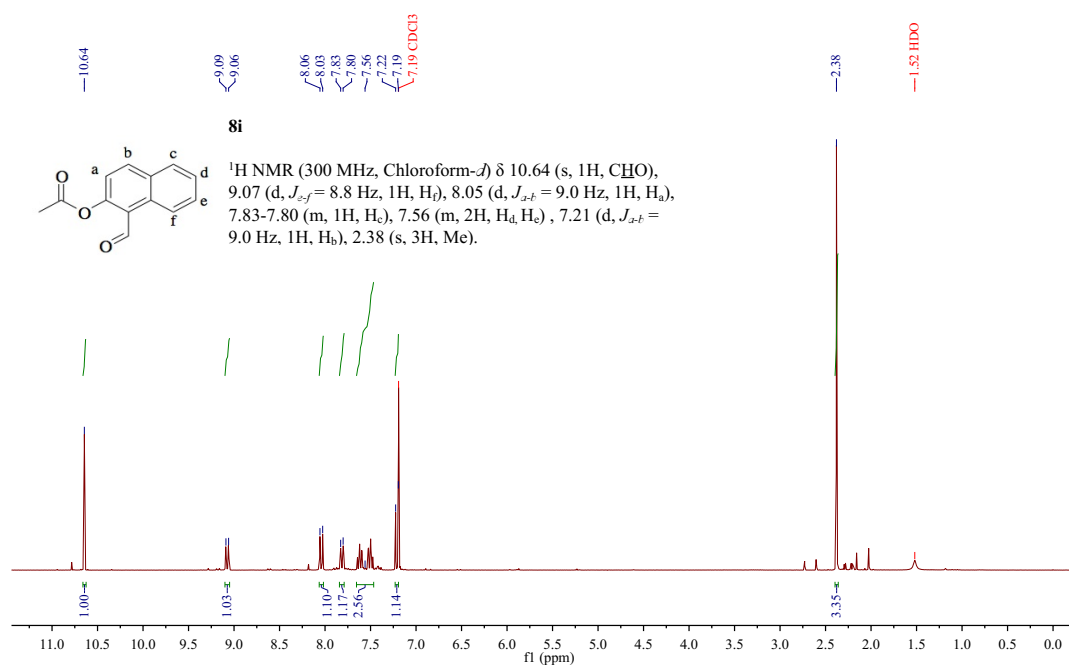

$^1\text{H NMR}$  spectrum of 1-formylnaphthalen-2-yl acetate

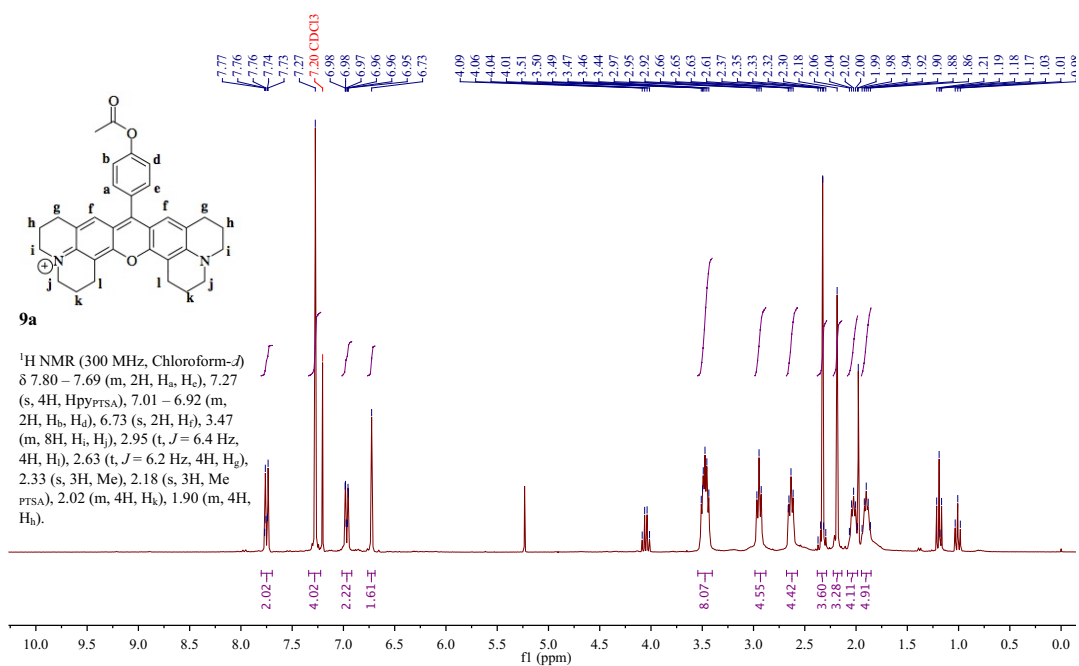

<sup>1</sup>H NMR spectrum of Acetylated HR-*p*OH

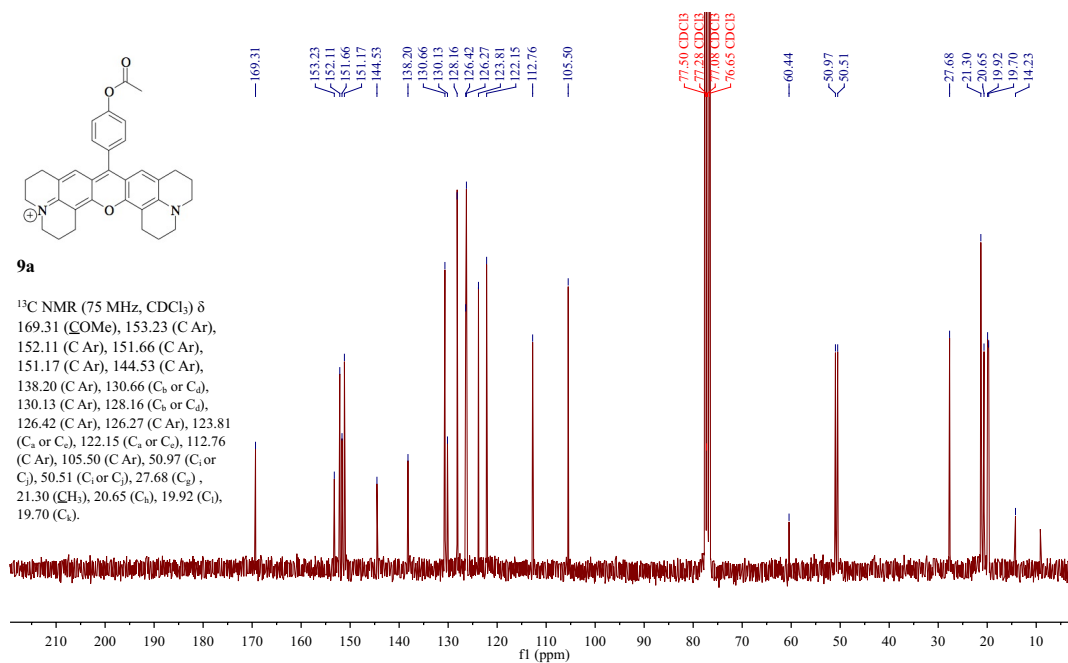

<sup>13</sup>C NMR spectrum of Acetylated HR-*p*OH

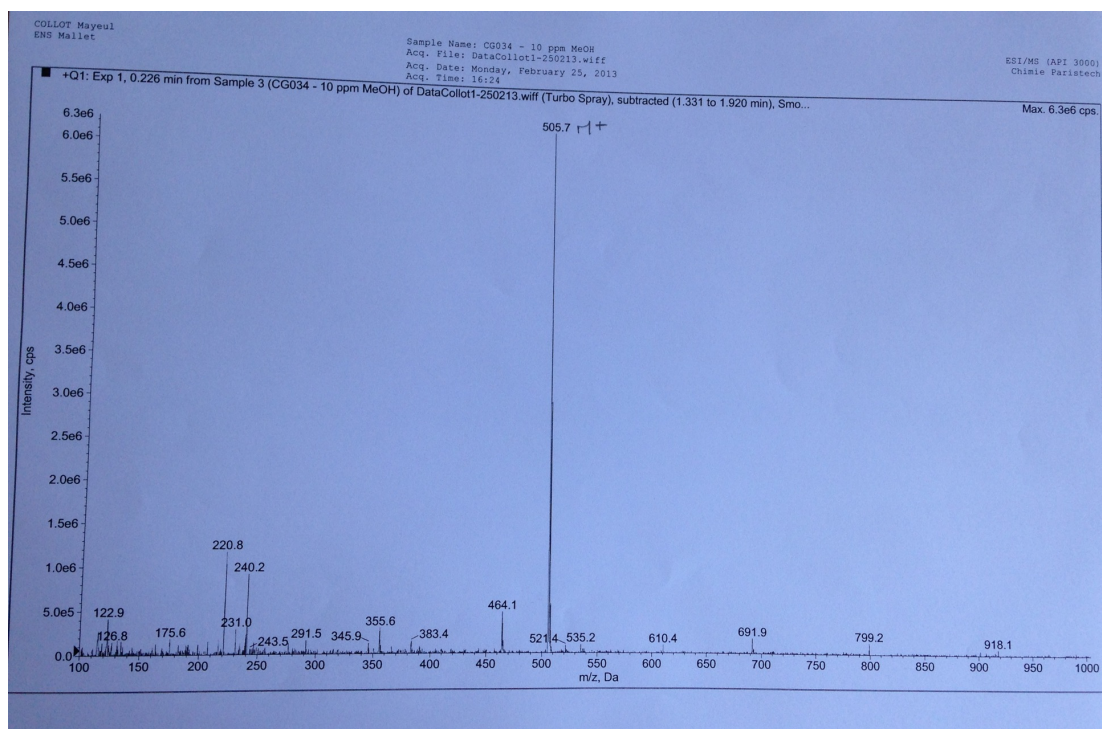

MS spectrum of Acetylated HR-*p*OH

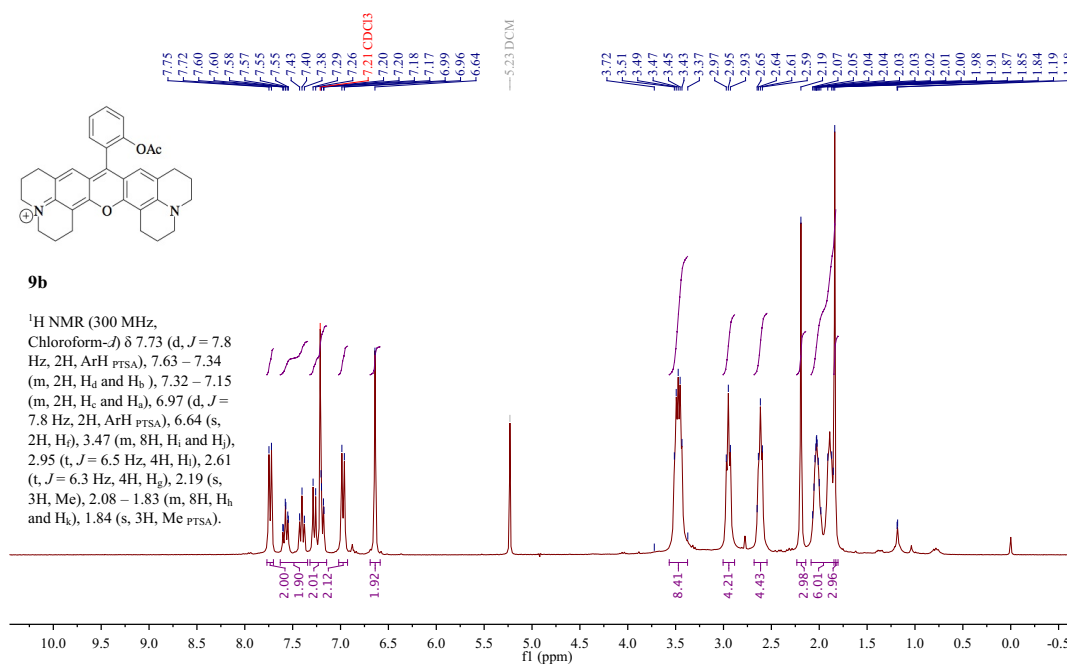

<sup>1</sup>H NMR spectrum of Acetylated HR-*o*OH



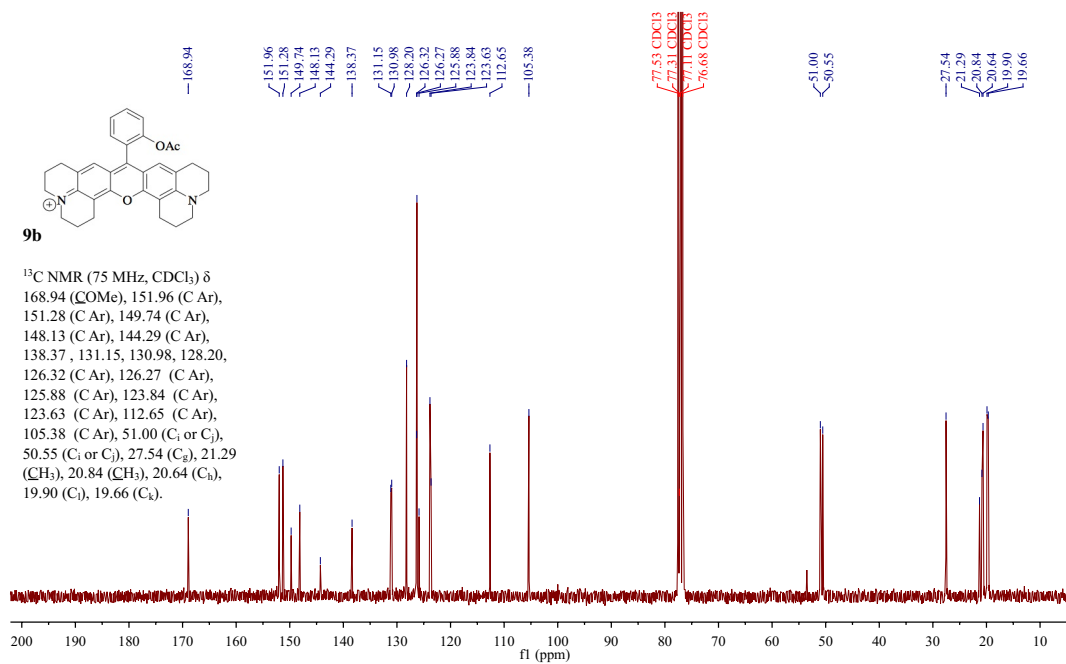

$^{13}\text{C}$  NMR spectrum of Acetylated HR-*o*OH

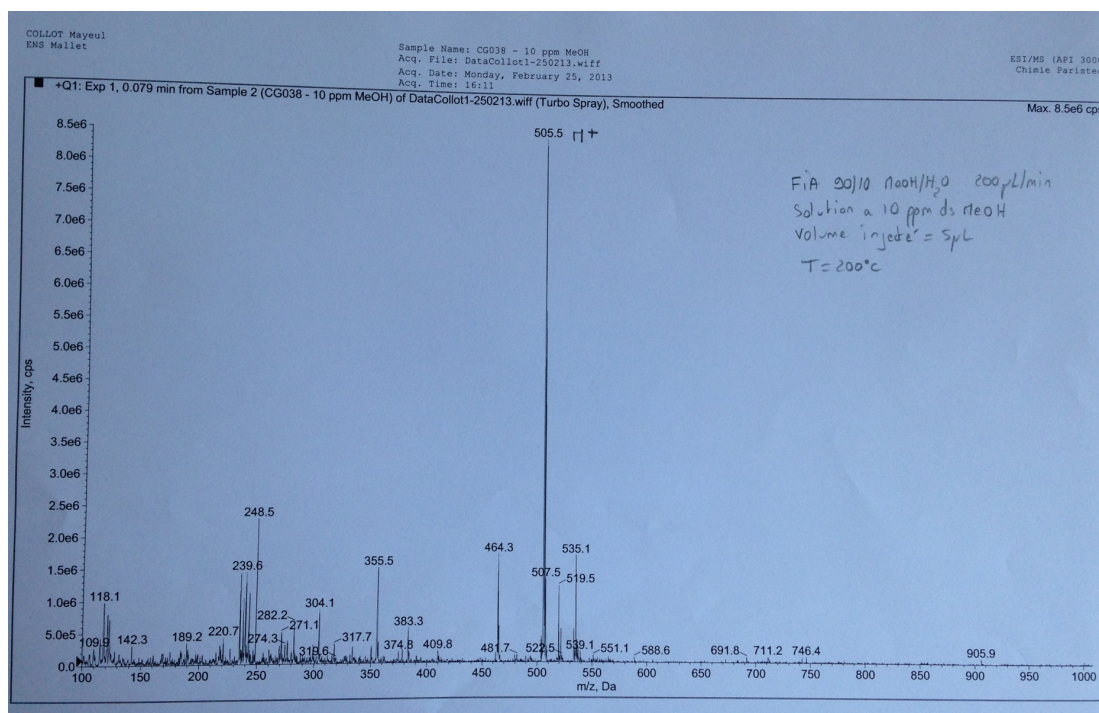

MS spectrum of Acetylated HR-*o*OH

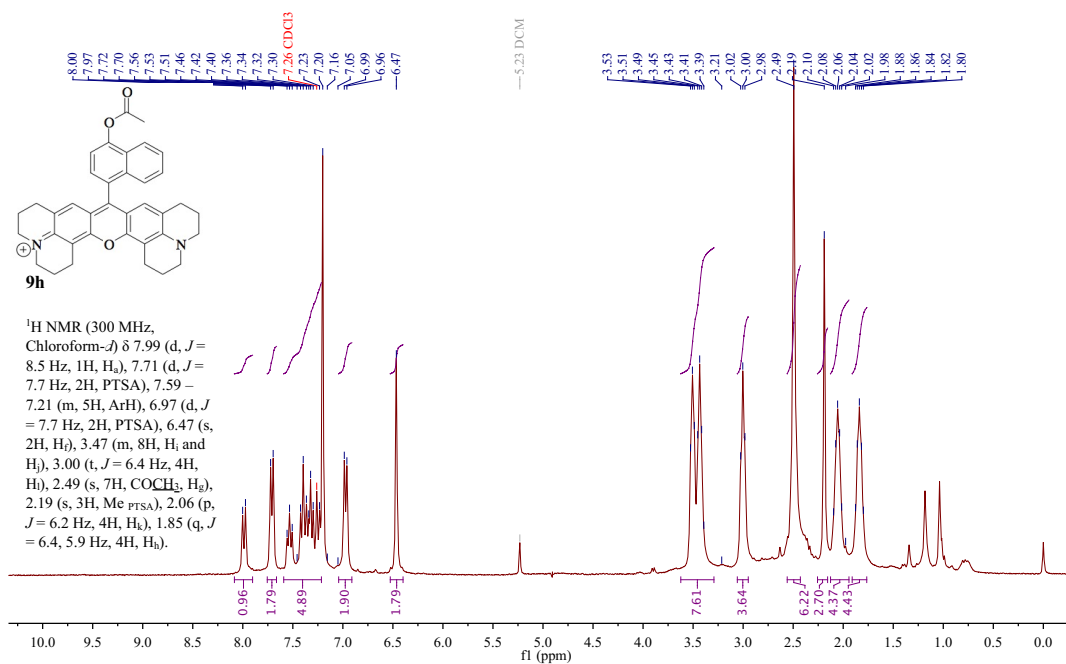

<sup>1</sup>H NMR spectrum of Acetylated *p*-Nph

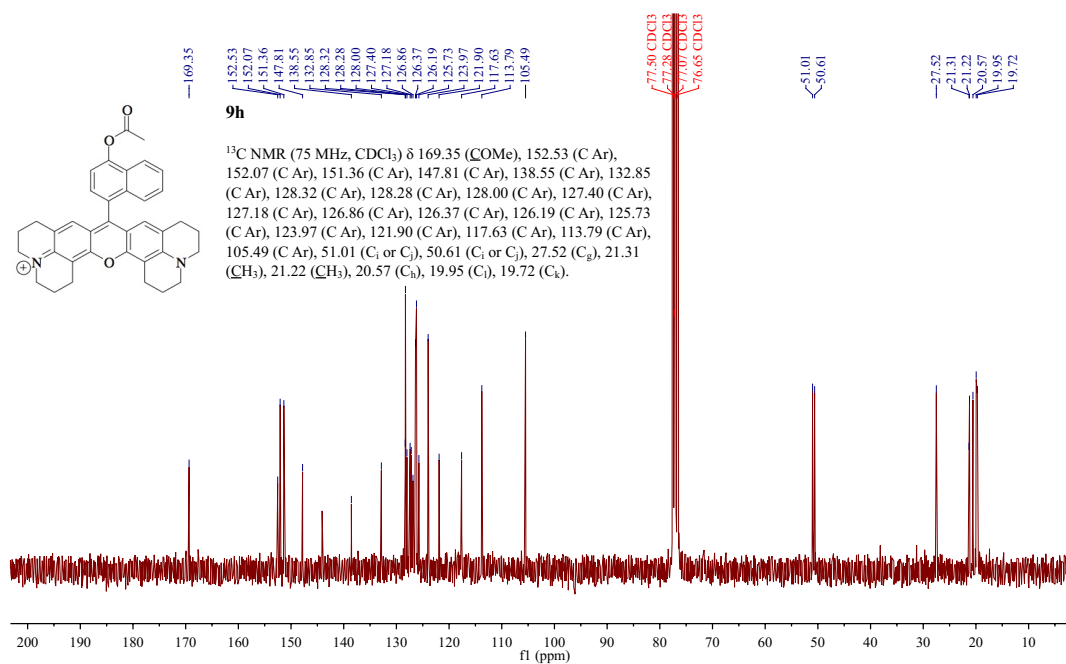

<sup>13</sup>C NMR spectrum of Acetylated *p*-Nph

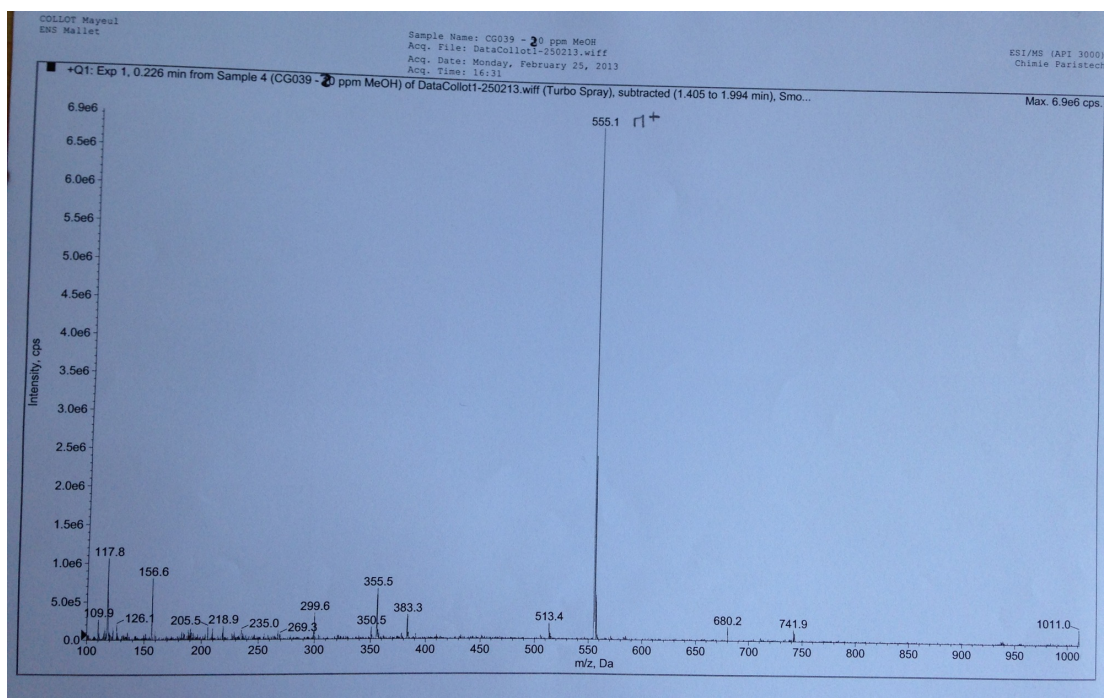

MS spectrum of Acetylated *p*-Nph

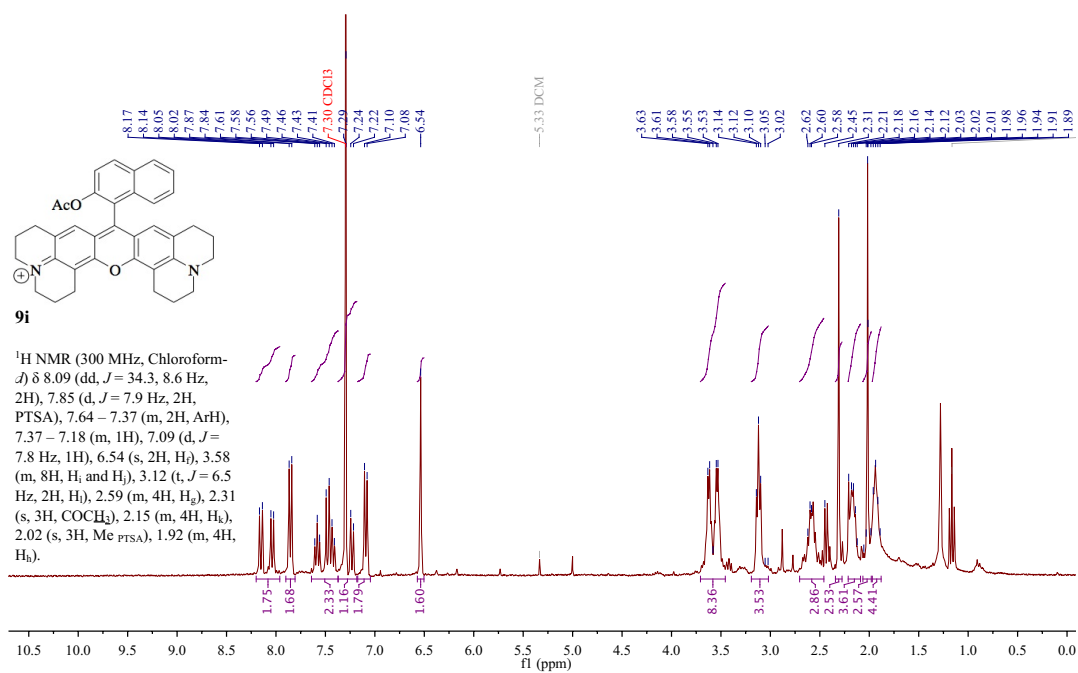

<sup>1</sup>H NMR spectrum of Acetylated *o*-Nph

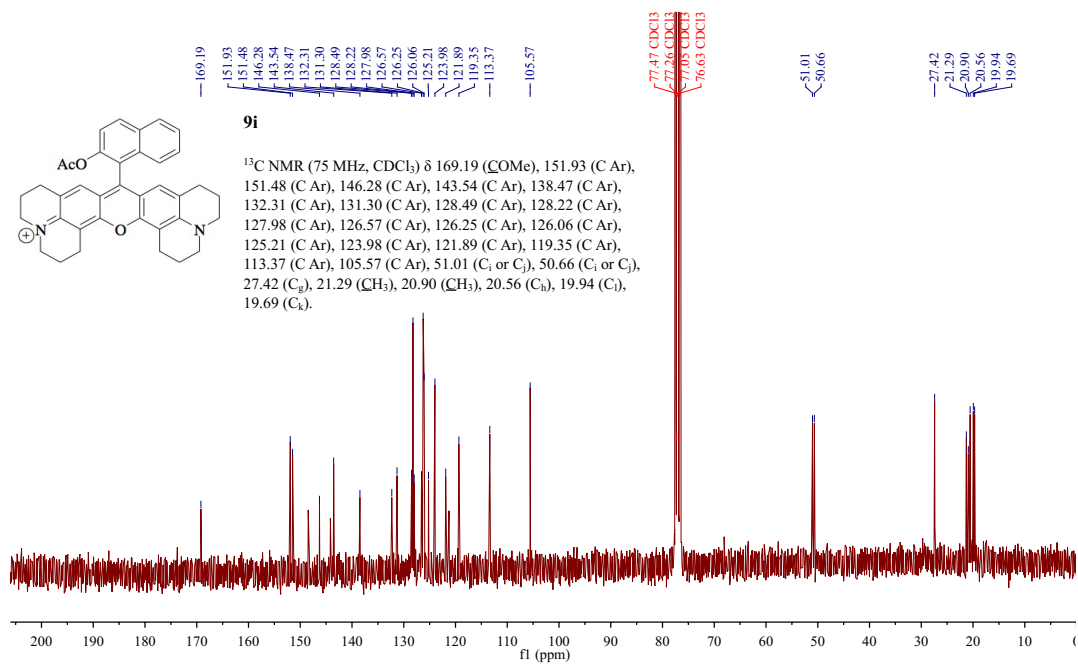

$^{13}\text{C}$  NMR spectrum of Acetylated *o*-Nph

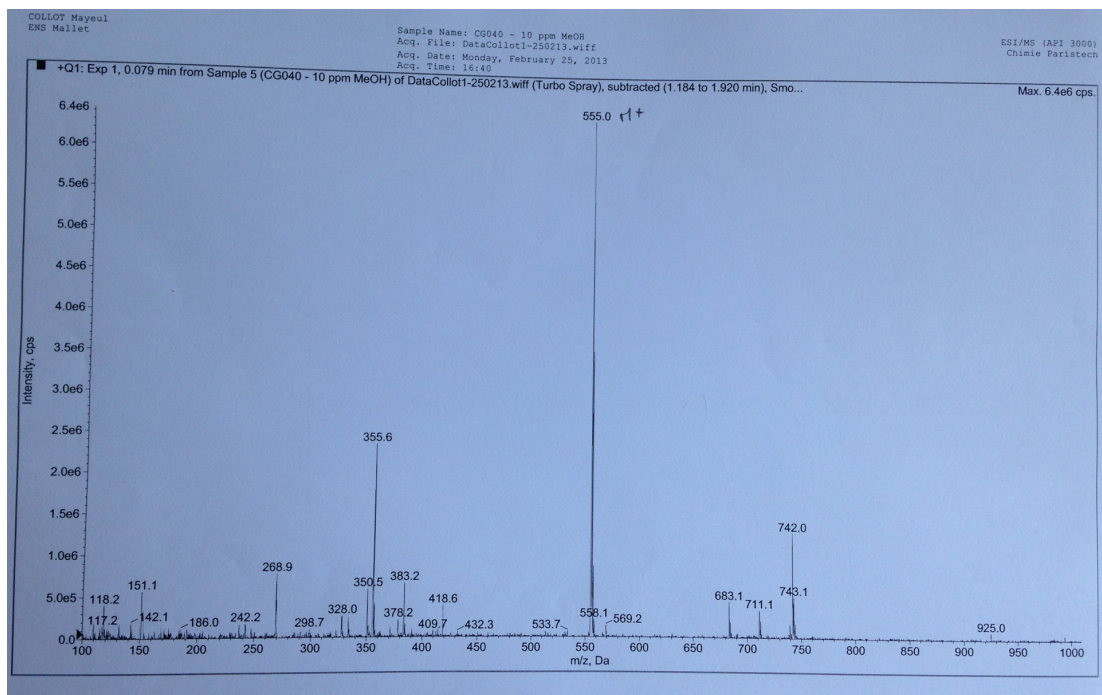

MS spectrum of Acetylated *o*-Nph

# HRMS of the first set of H-Rubies

C:\Xcalibur\data\Analyses\H-00391  
MeOH

12/02/14 18:35:56

DESPRAS Guillaume CG041

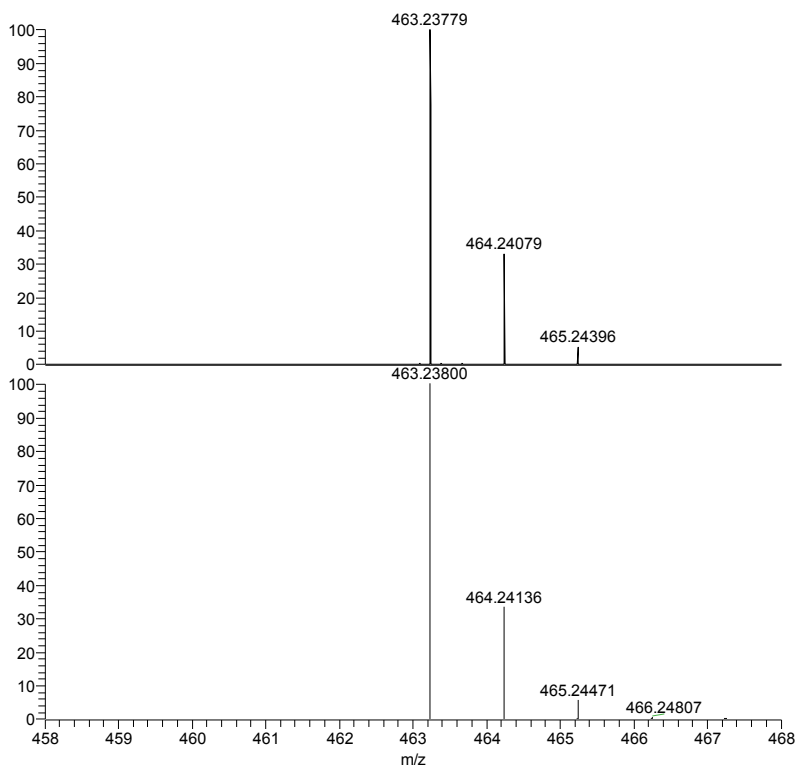

NL:  
1.64E8  
H-00391#10-16  
RT: 0.24-0.40 AV:  
7 T: FTMS + p ESI  
Full ms  
[110.00-1200.00]

NL:  
7.05E5  
C<sub>31</sub> H<sub>31</sub> N<sub>2</sub> O<sub>2</sub>:  
C<sub>31</sub> H<sub>31</sub> N<sub>2</sub> O<sub>2</sub>  
pa Chrg 1

HRMS spectrum of HR-pOH

C:\Xcalibur\data\Analyses\H-00389  
MeOH

12/02/14 18:25:14

DESPRAS Guillaume MC500

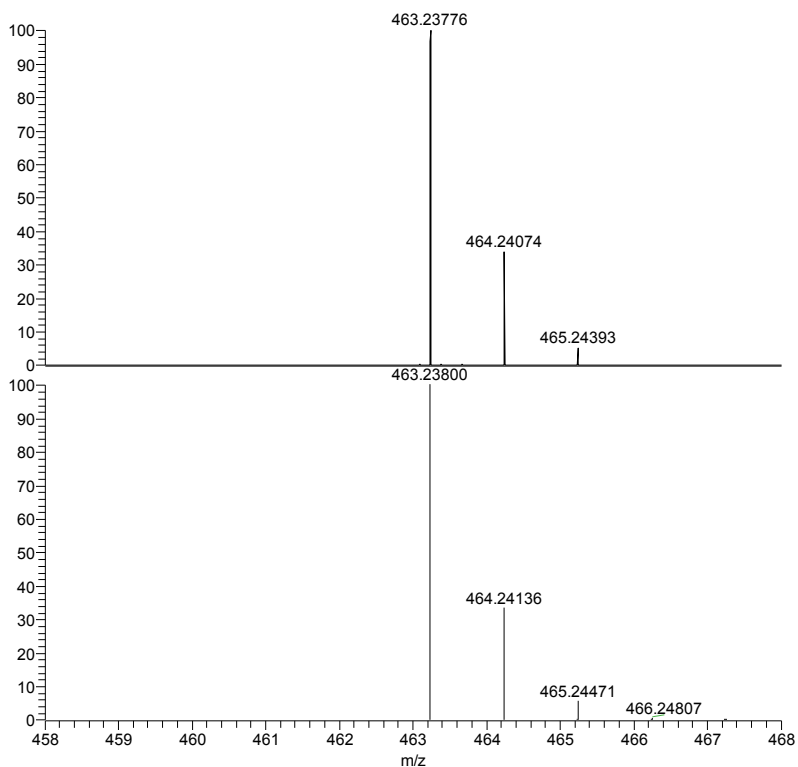

NL:  
9.19E7  
H-00389#10-17  
RT: 0.24-0.44 AV:  
8 T: FTMS + p ESI  
Full ms  
[110.00-1200.00]

NL:  
7.05E5  
C<sub>31</sub> H<sub>31</sub> N<sub>2</sub> O<sub>2</sub>:  
C<sub>31</sub> H<sub>31</sub> N<sub>2</sub> O<sub>2</sub>  
pa Chrg 1

HRMS spectrum of HR-mOH

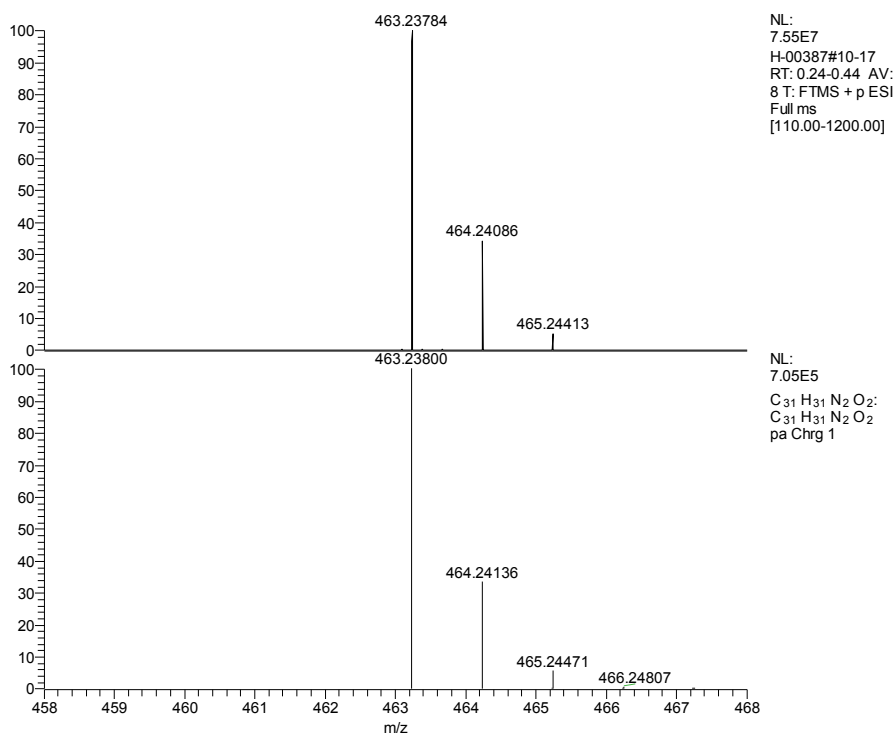

HRMS spectrum of **HR-oOH**

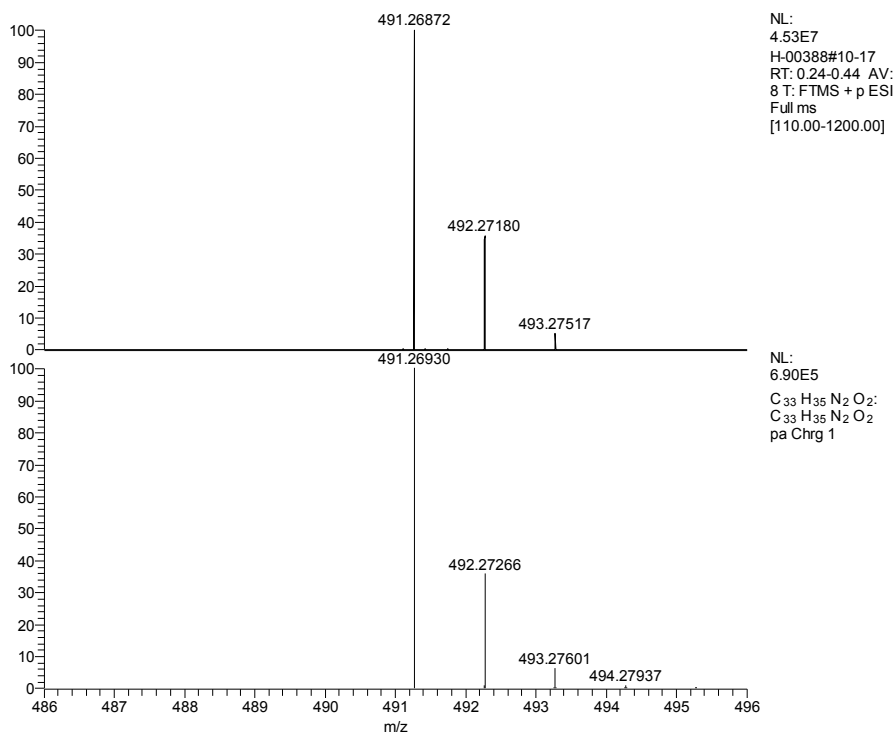

HRMS spectrum of **HR-Me**

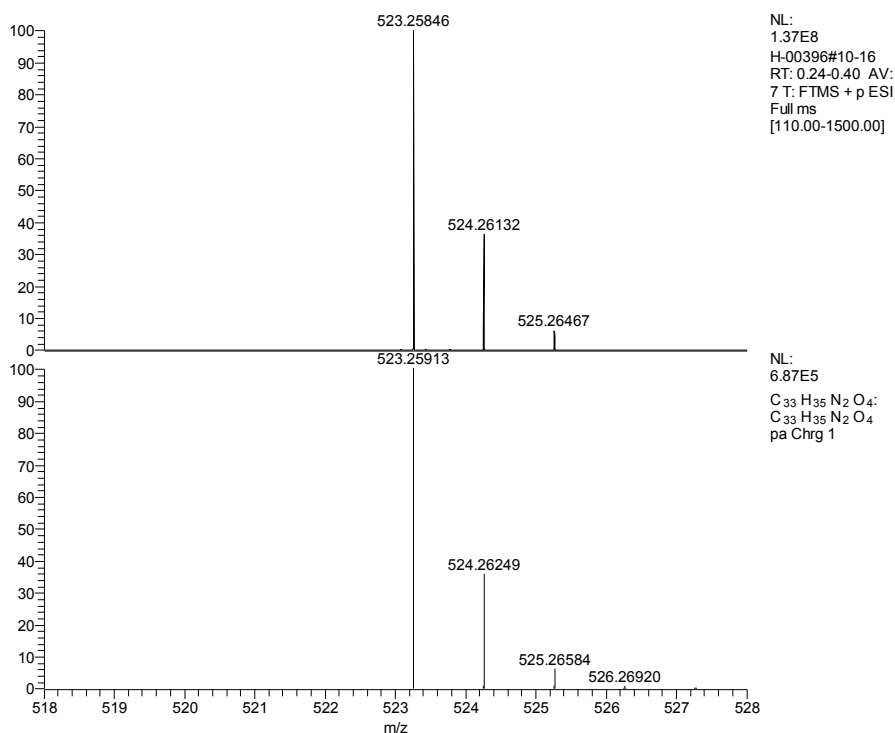

### HRMS spectrum of HR-OMe

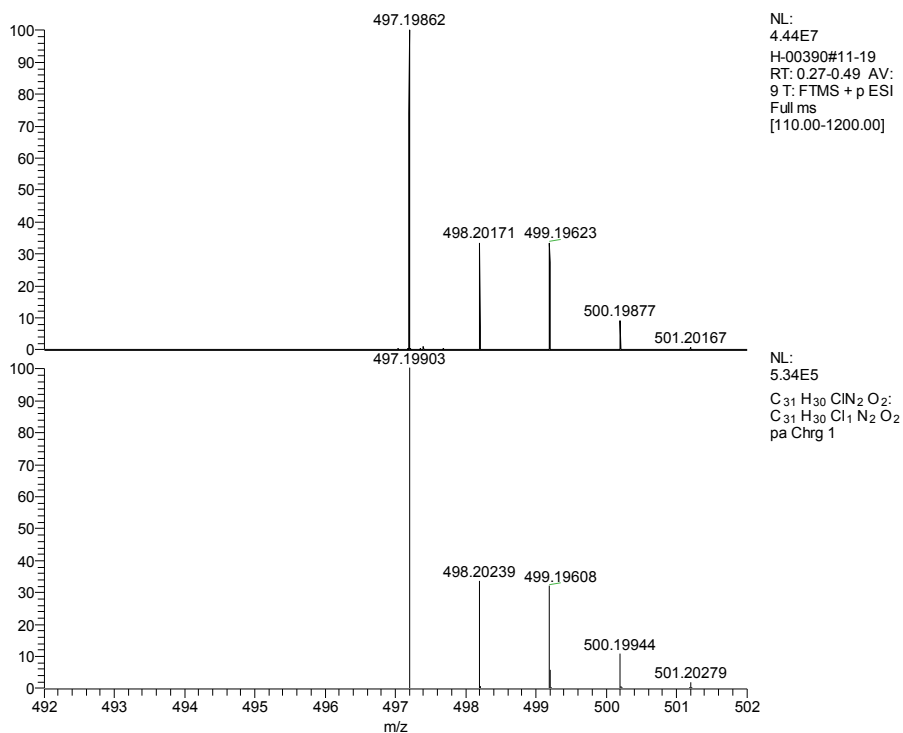

### HRMS spectrum of HR-Cl

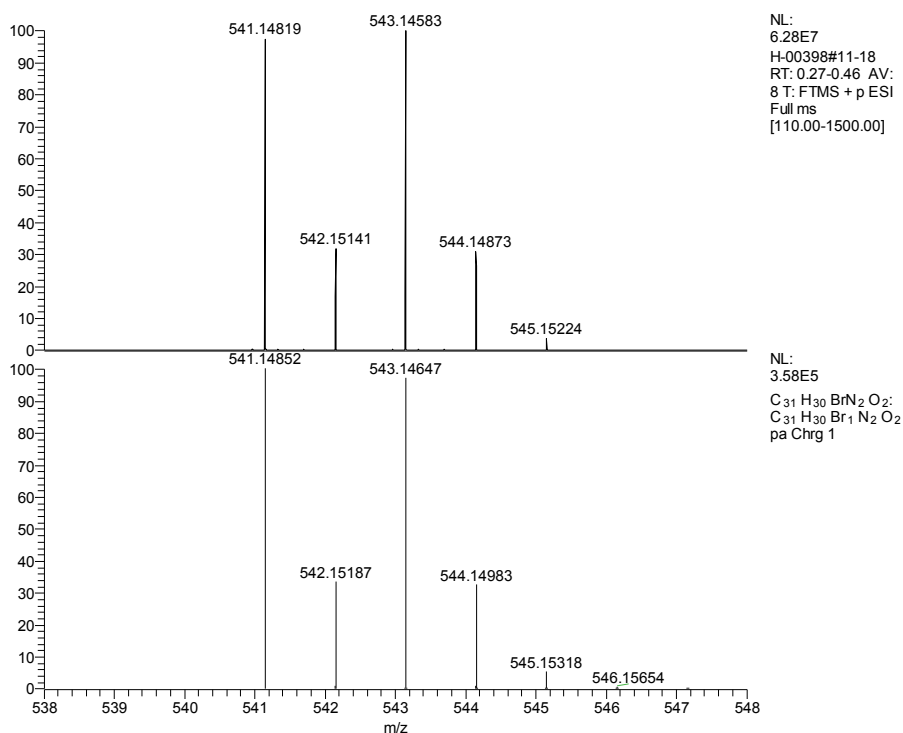

### HRMS spectrum of HR-Br

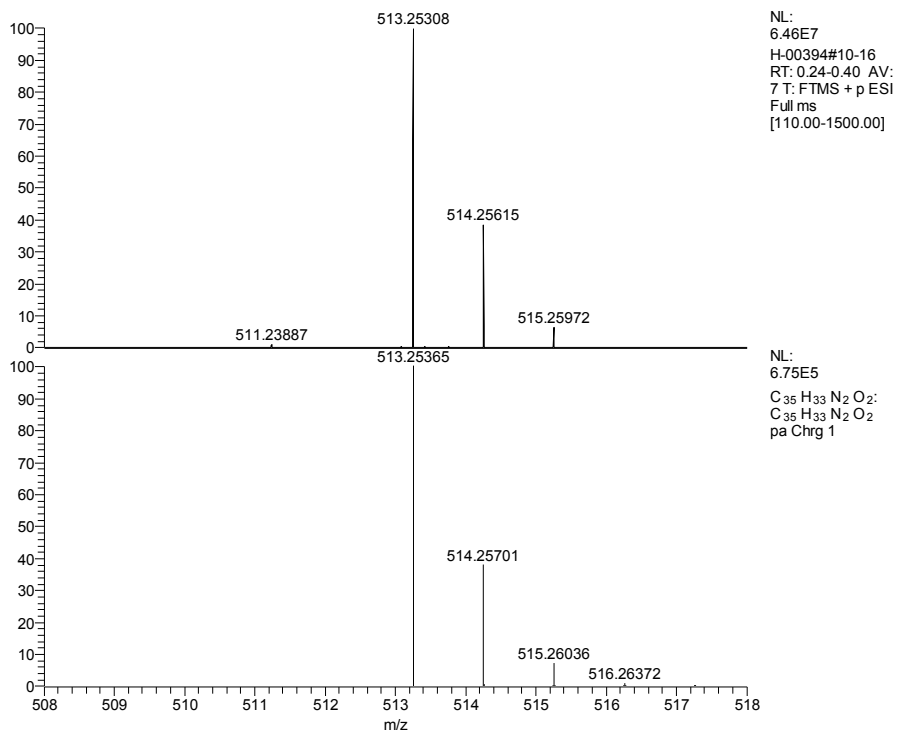

### HRMS spectrum of p-Nph



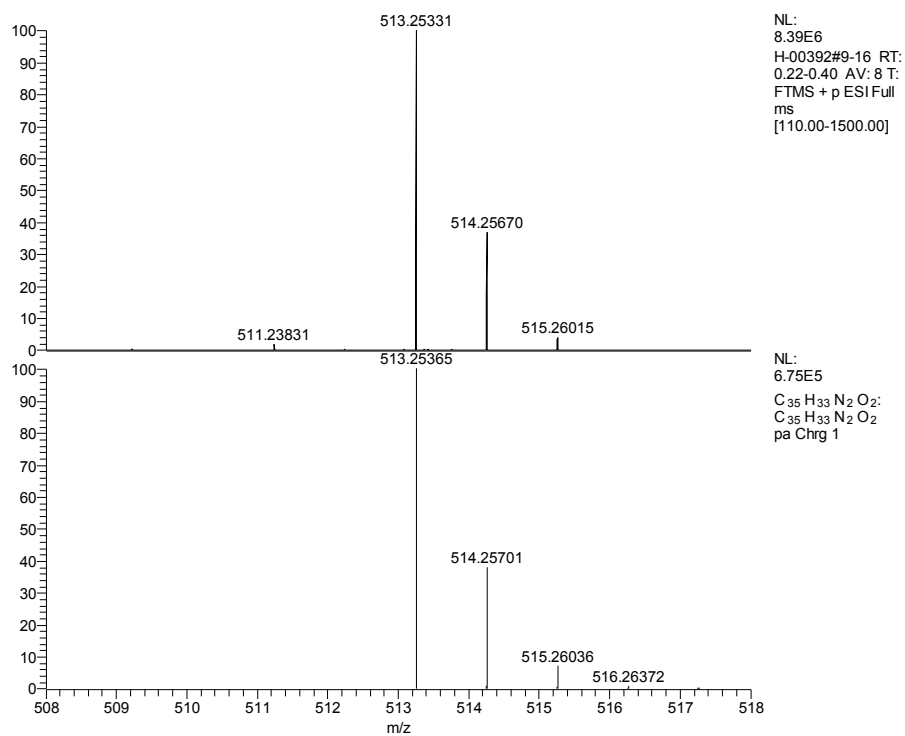

HRMS spectrum of *o*-Nph

## NMR spectra of functionalisable H-Rubies and their intermediates

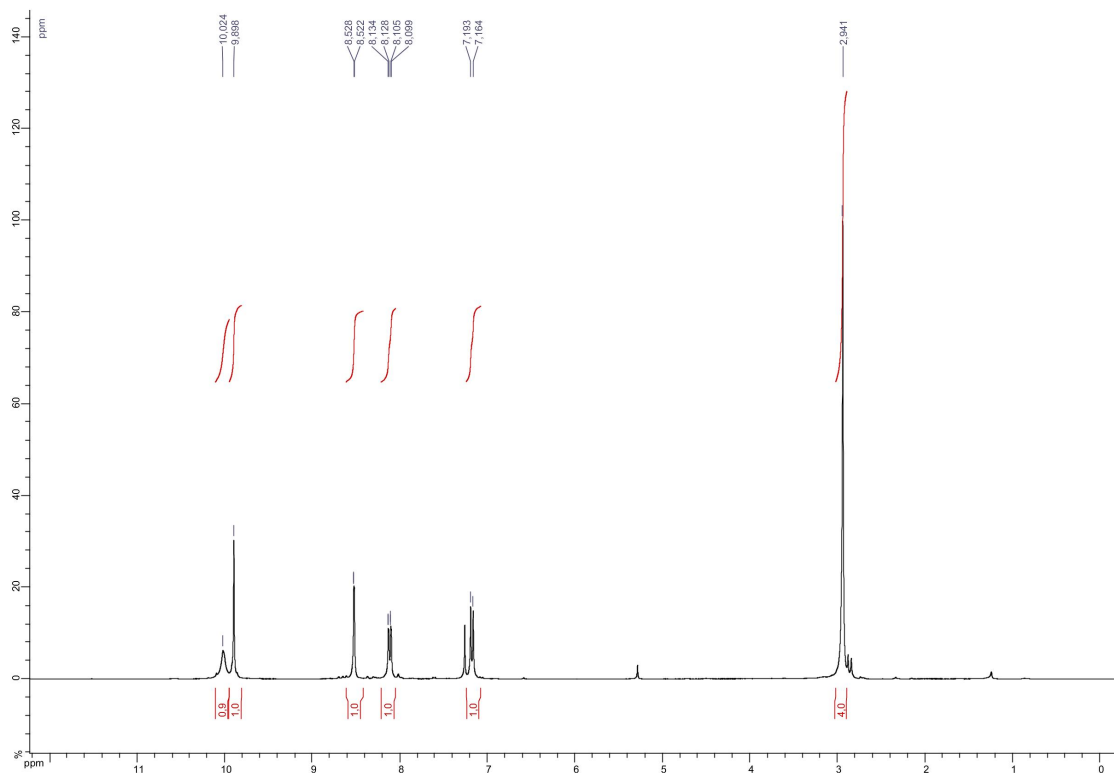

<sup>1</sup>H NMR spectrum of **1** (CDCl<sub>3</sub>, 300 MHz)

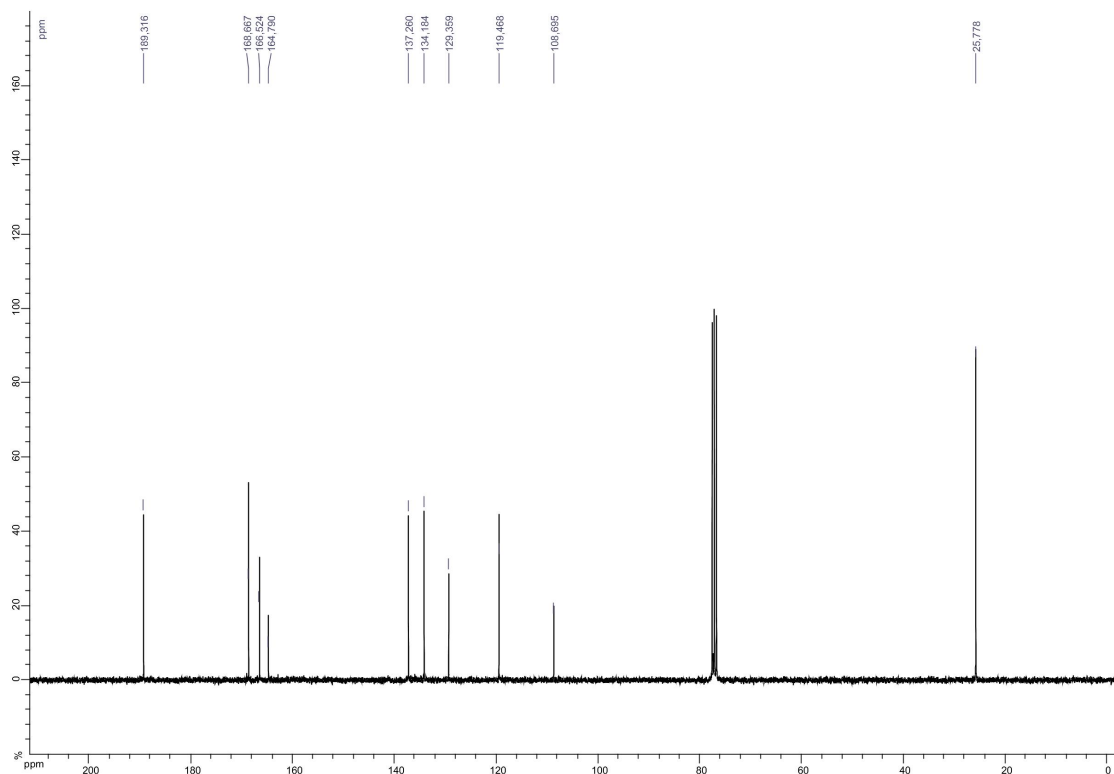

<sup>13</sup>C NMR spectrum of **1** (CDCl<sub>3</sub>, 75 MHz)

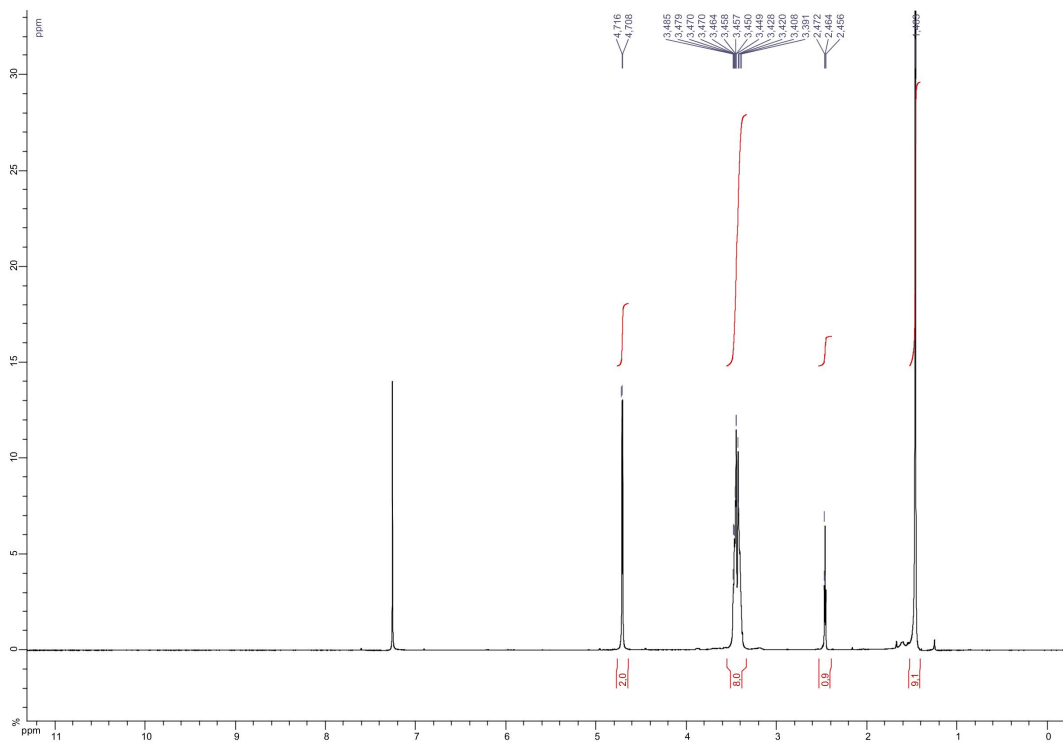

$^1\text{H}$  NMR spectrum of 1-tert-butyl 4-prop-2-yn-1-yl piperazine-1,4-dicarboxylate (CDCl<sub>3</sub>, 300 MHz)

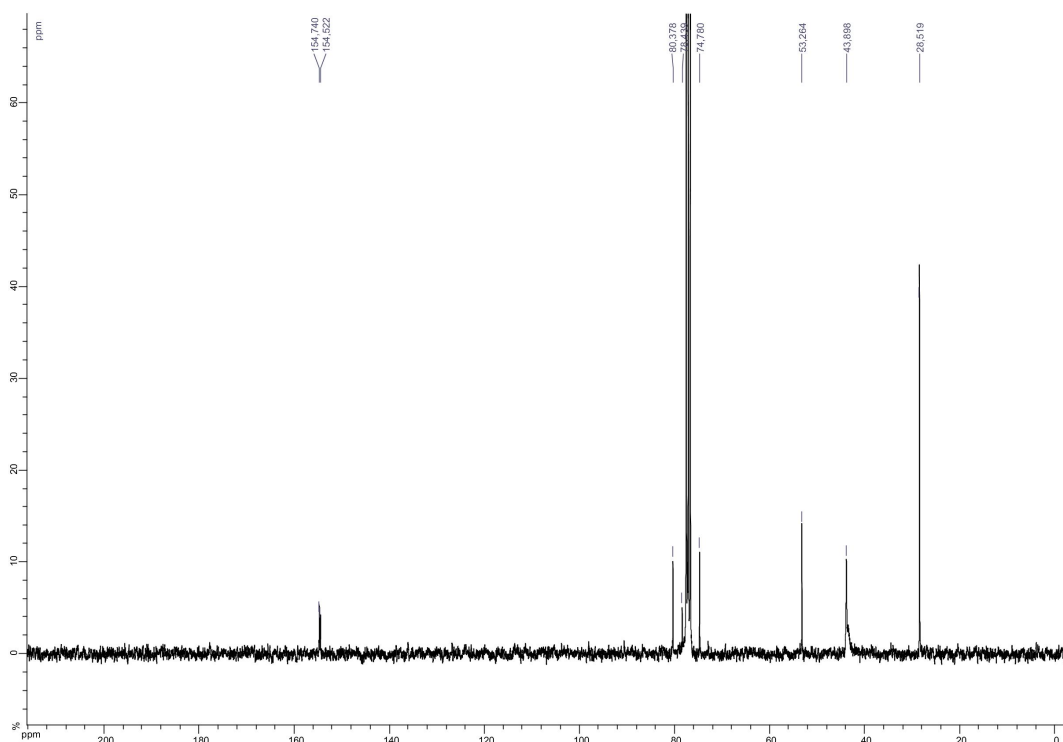

$^{13}\text{C}$  NMR spectrum of 1-tert-butyl 4-prop-2-yn-1-yl piperazine-1,4-dicarboxylate (CDCl<sub>3</sub>, 75 MHz)

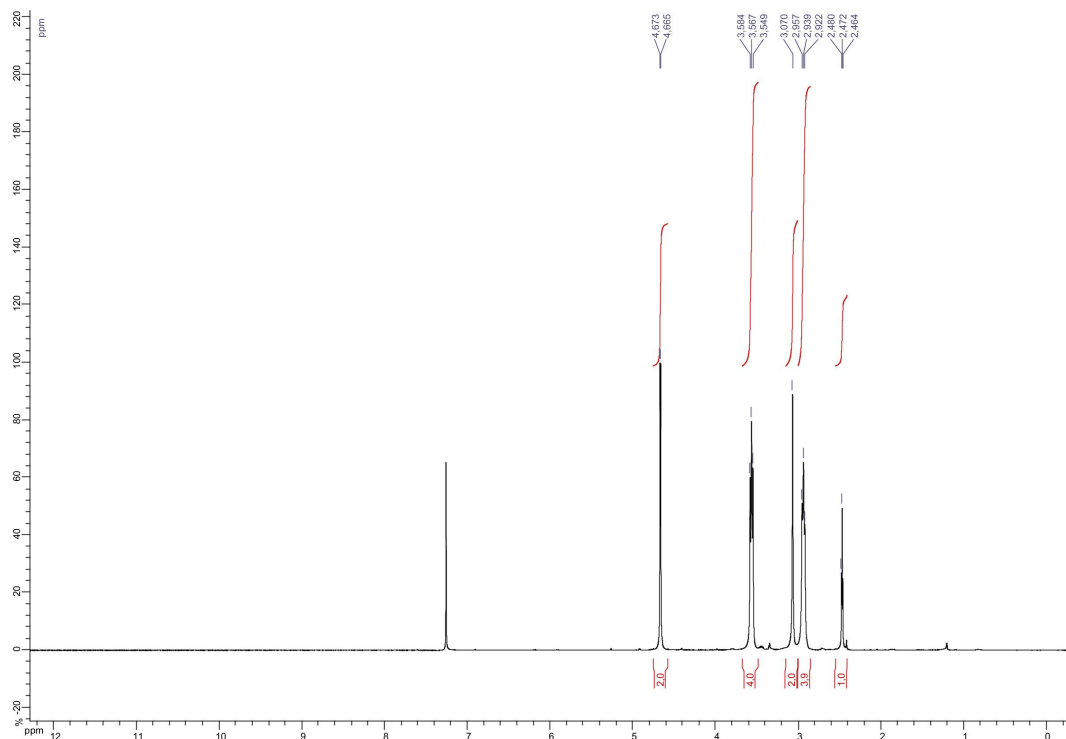

$^1\text{H}$  NMR spectrum of **4-((prop-2-yn-1-yloxy)carbonyl)piperazin-1-ium 2,2,2-trifluoroacetate** ( $\text{CDCl}_3$ , 300 MHz)

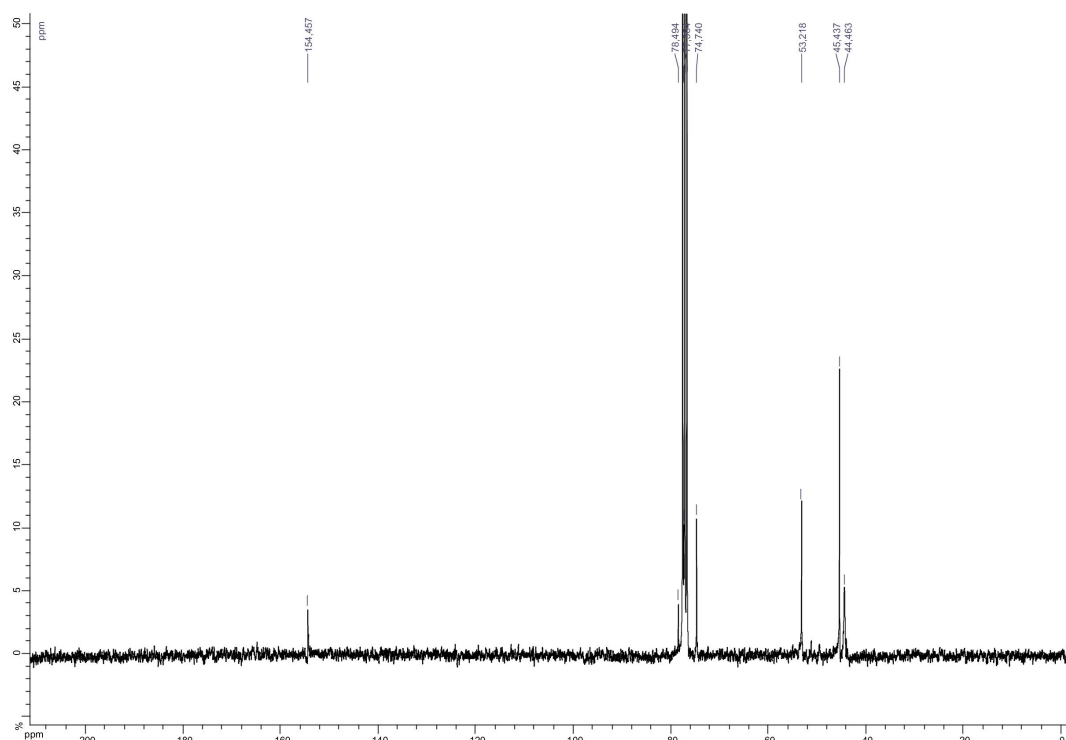

$^{13}\text{C}$  NMR spectrum of **4-((prop-2-yn-1-yloxy)carbonyl)piperazin-1-ium 2,2,2-trifluoroacetate** ( $\text{CDCl}_3$ , 75 MHz)

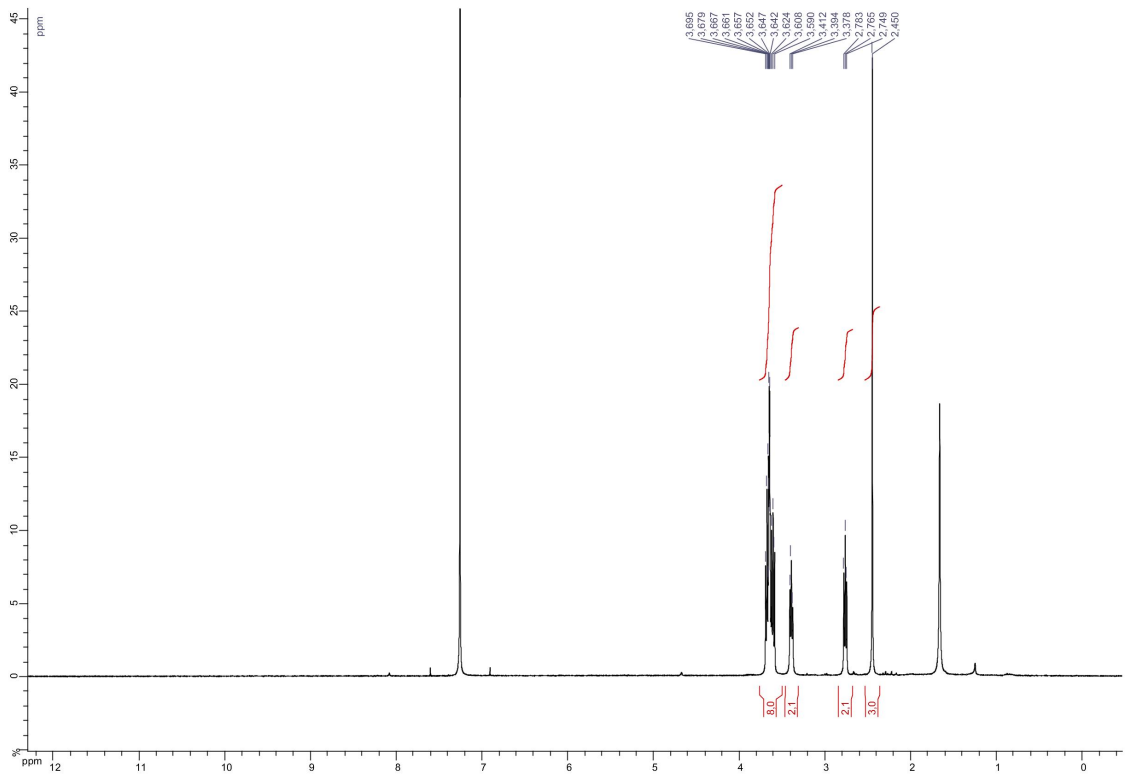

$^1\text{H}$  NMR spectrum of **2-(2-(2-azidoethoxy)ethoxy)-N-methylethanamine** ( $\text{CDCl}_3$ , 300 MHz)

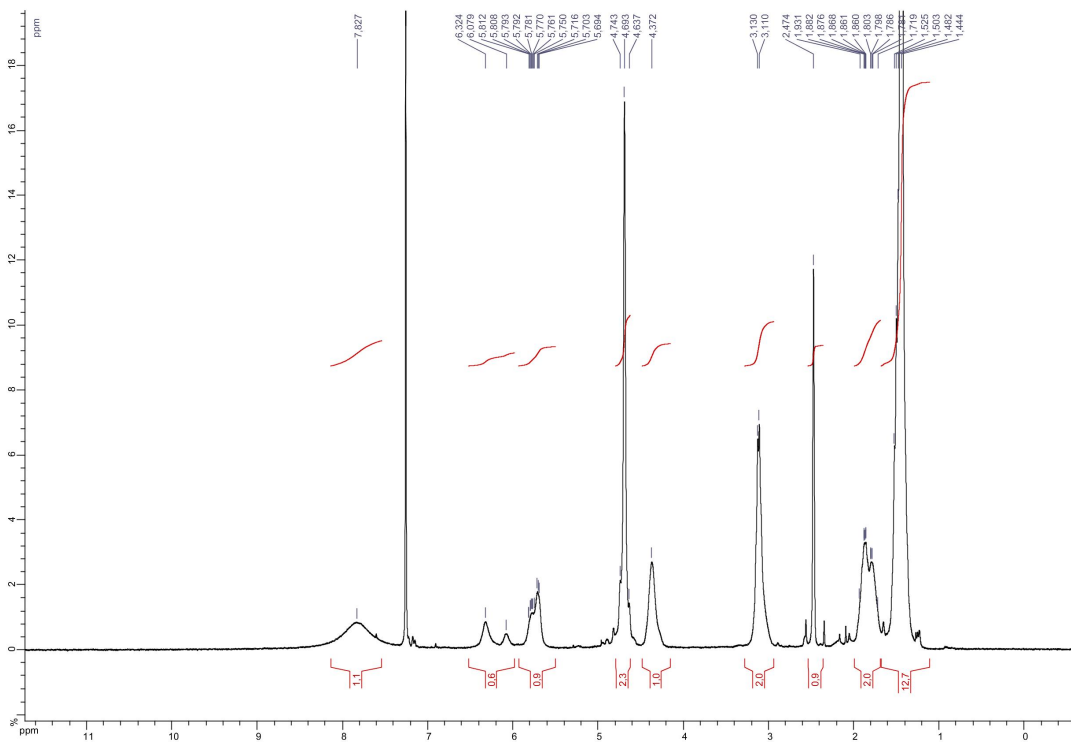

$^1\text{H}$  NMR spectrum of **6-((tert-butoxycarbonyl)amino)-2-(((prop-2-yn-1-yloxy)carbonyl)amino)hexanoic acid** ( $\text{CDCl}_3$ , 300 MHz)

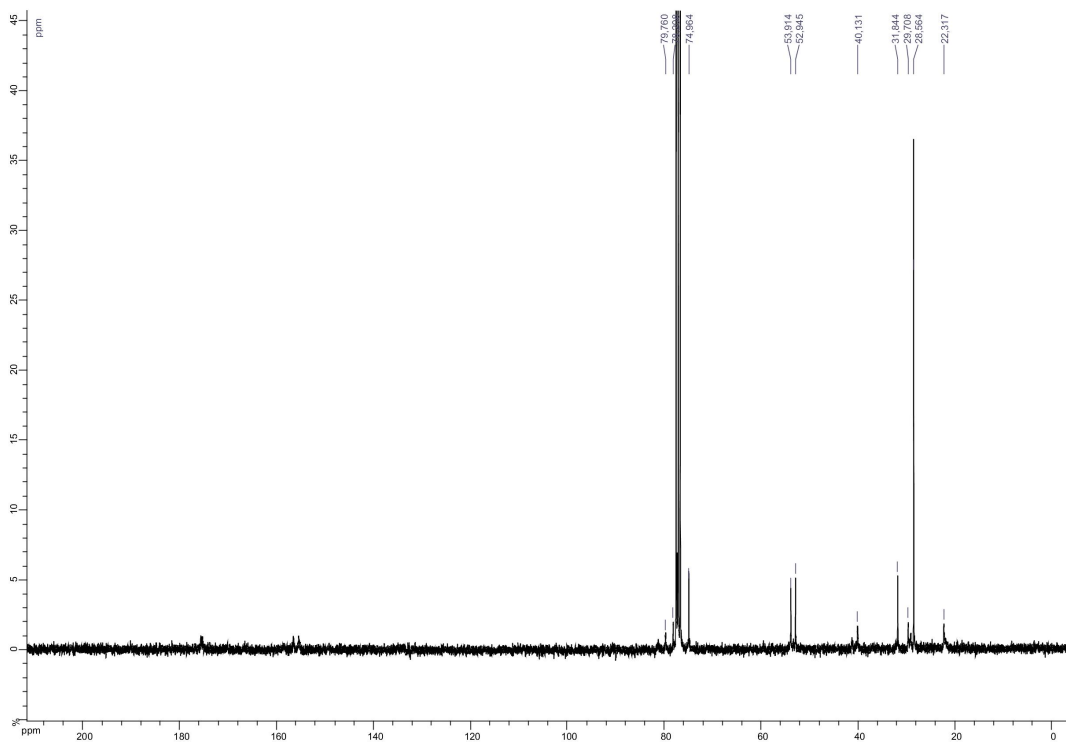

<sup>13</sup>C NMR spectrum of **6-((tert-butoxycarbonyl)amino)-2-(((prop-2-yn-1-yloxy)carbonyl)amino)hexanoic acid** (CDCl<sub>3</sub>, 75 MHz)

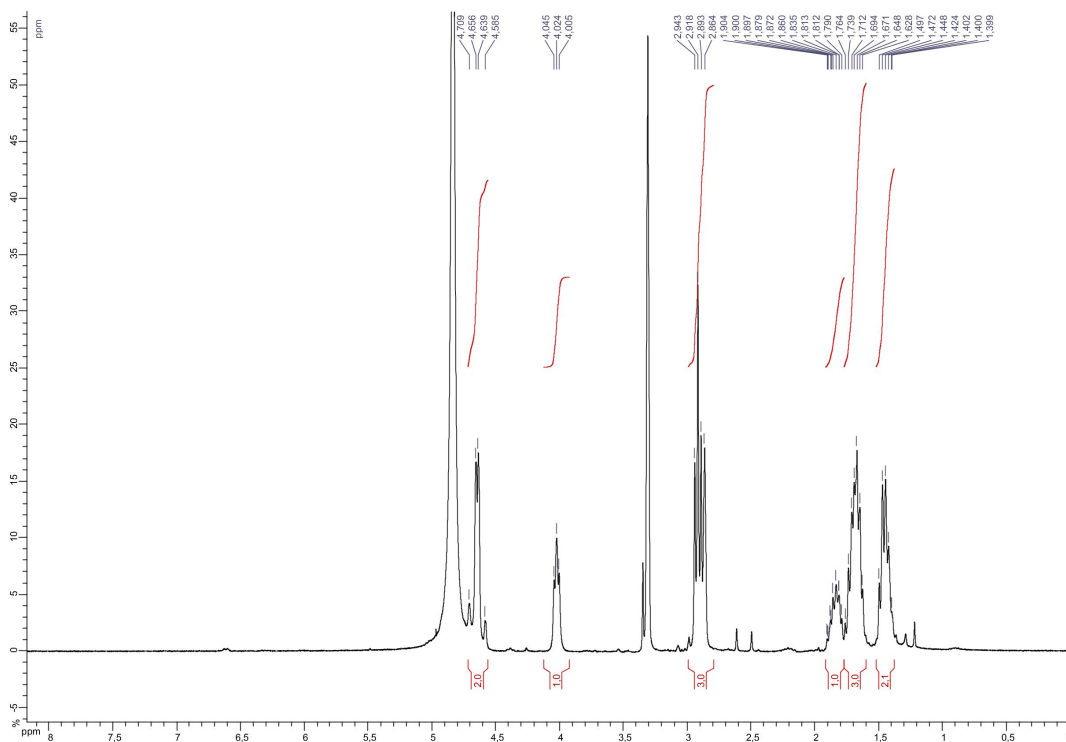

<sup>1</sup>H NMR spectrum of **5-carboxy-5-(((prop-2-yn-1-yloxy)carbonyl)amino)pentan-1-aminium 2,2,2-trifluoroacetate** (CDCl<sub>3</sub>, 300 MHz)

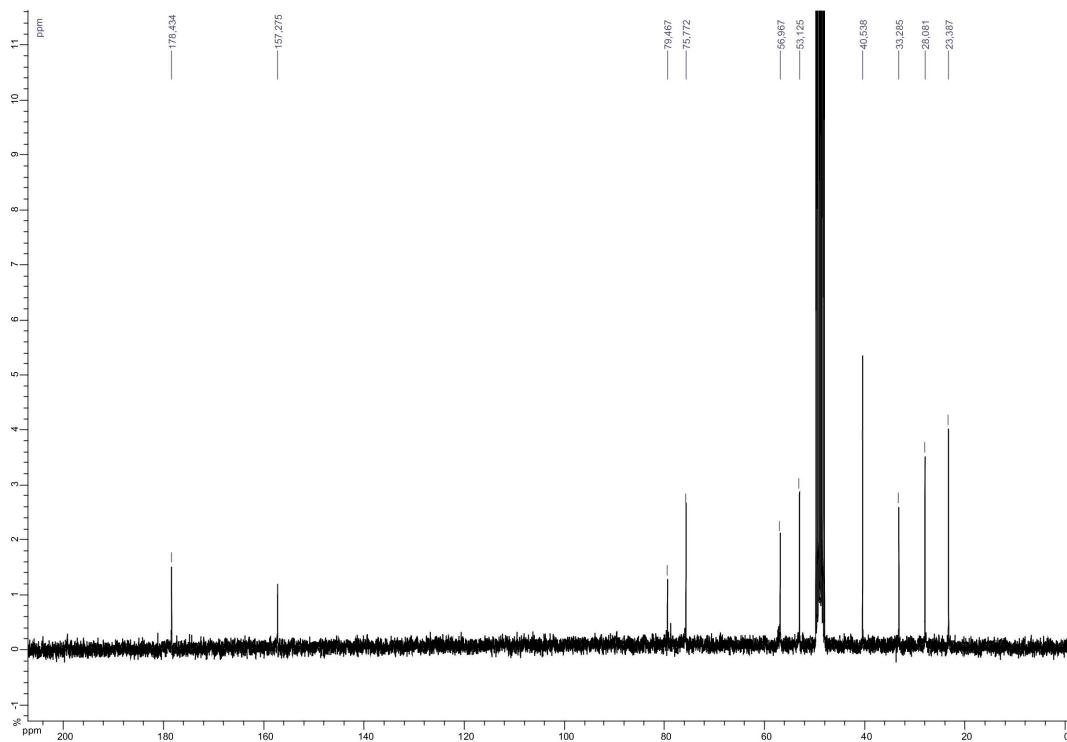

$^{13}\text{C}$  NMR spectrum of 5-carboxy-5-(((prop-2-yn-1-yloxy)carbonyl)amino)pentan-1-aminium 2,2,2-trifluoroacetate (CDCl<sub>3</sub>, 75 MHz)

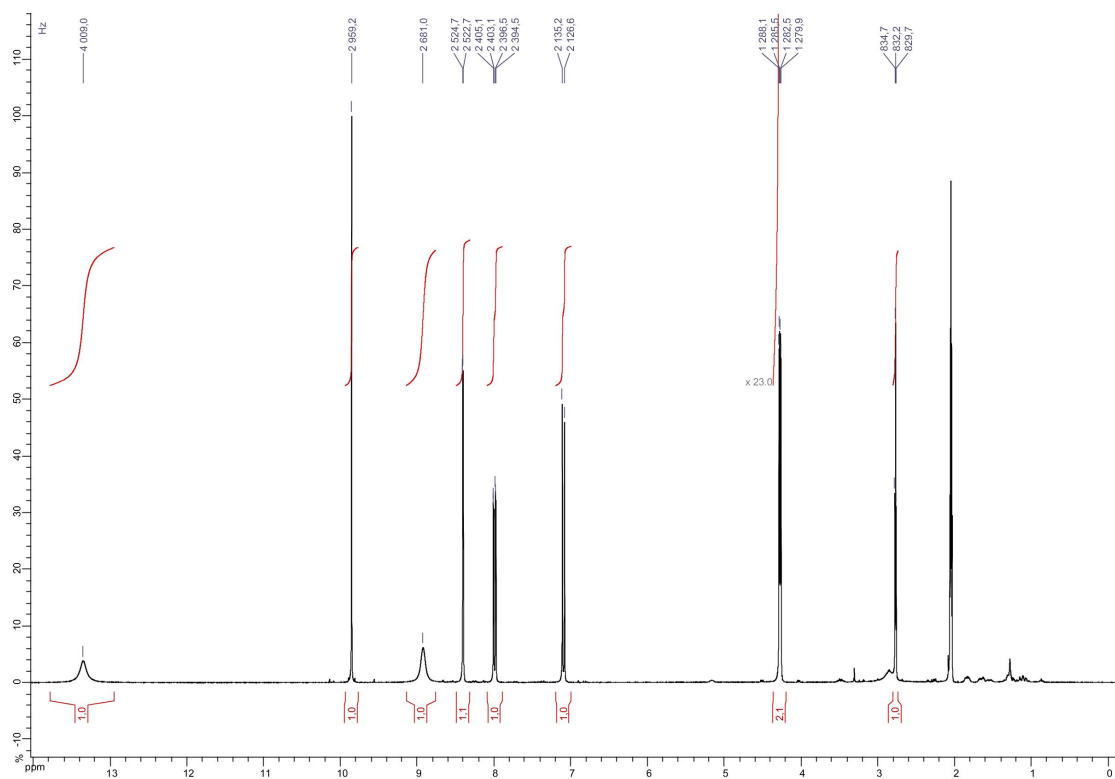

$^1\text{H}$  NMR spectrum of **2a** ((CD<sub>3</sub>)<sub>3</sub>CO, 300 MHz)

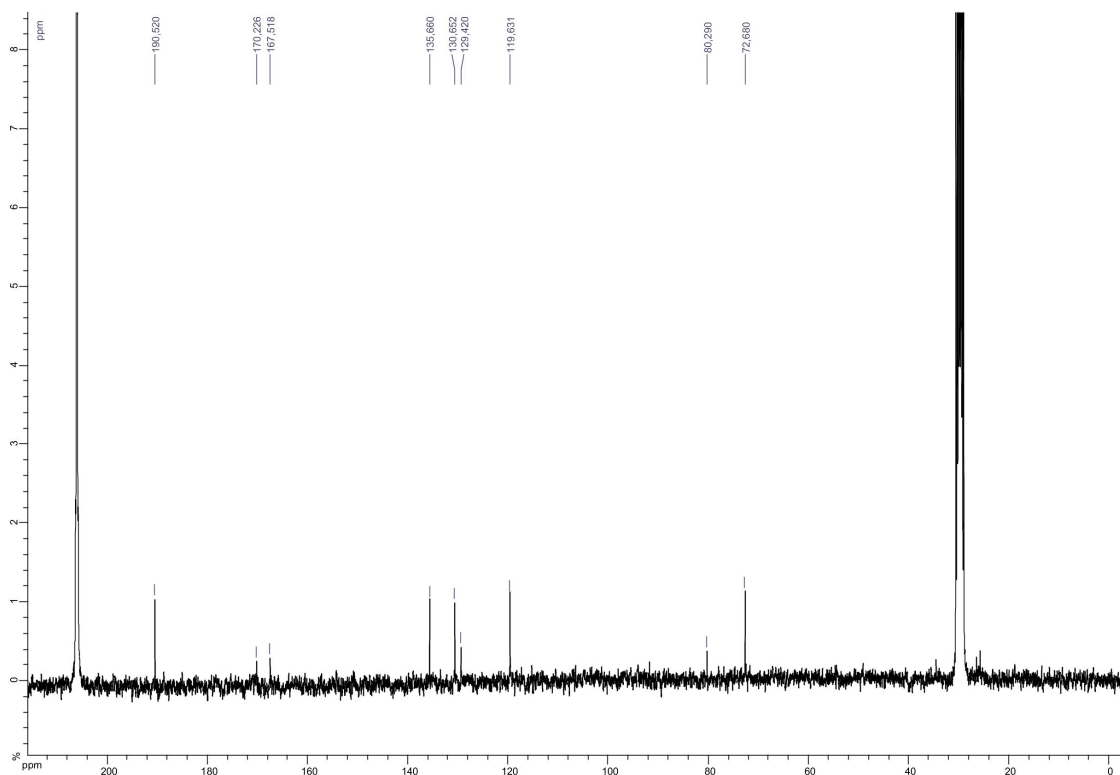

$^{13}\text{C}$  NMR spectrum of **2a** ( $(\text{CD}_3)_3\text{CO}$ , 75 MHz)

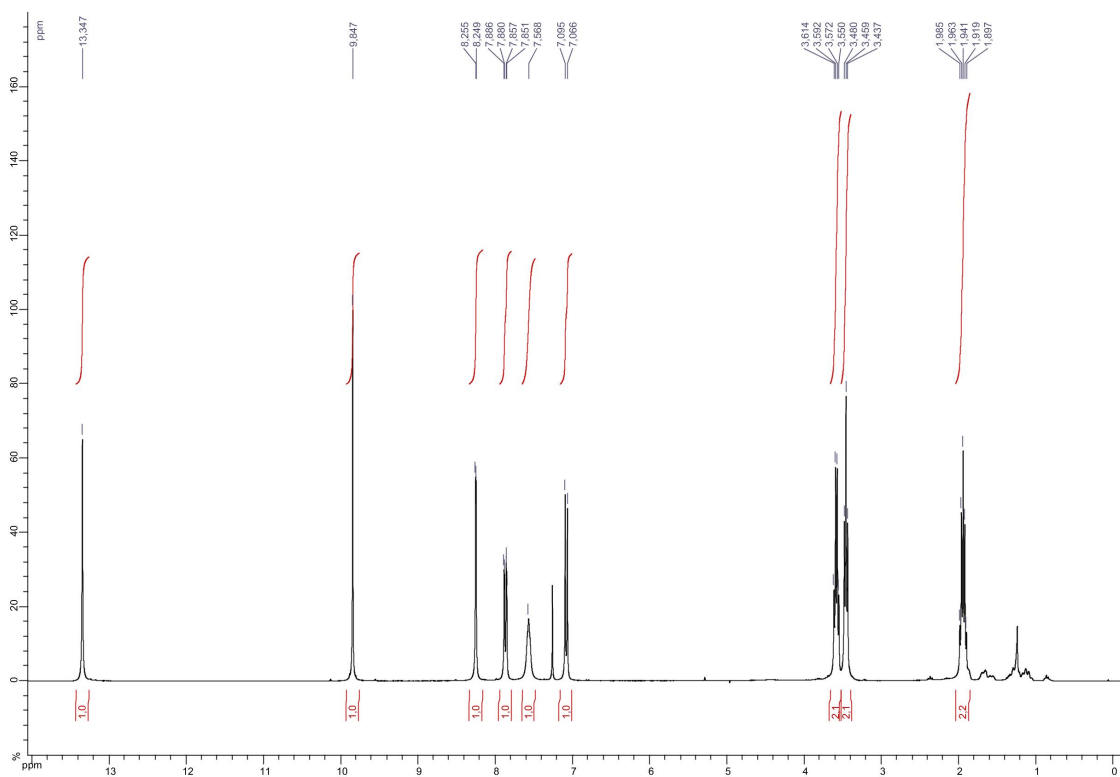

$^1\text{H}$  NMR spectrum of **2b** ( $\text{CDCl}_3$ , 300 MHz)



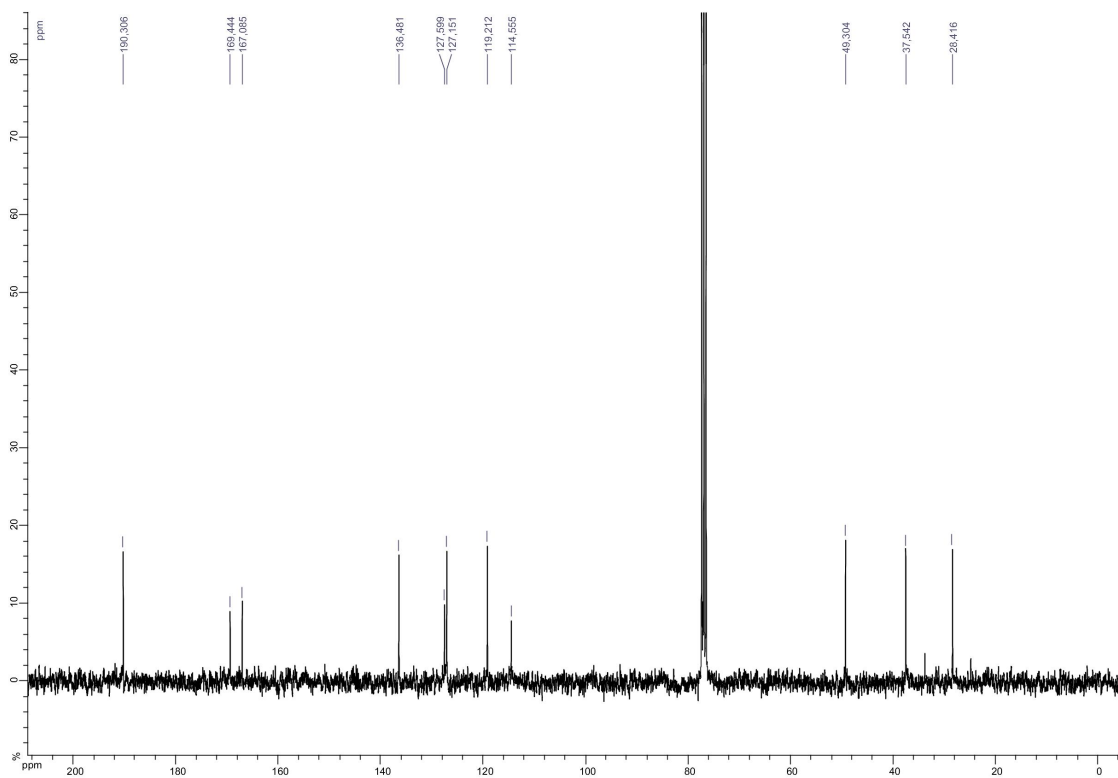

$^{13}\text{C}$  NMR spectrum of **2b** ( $\text{CDCl}_3$ , 75 MHz)

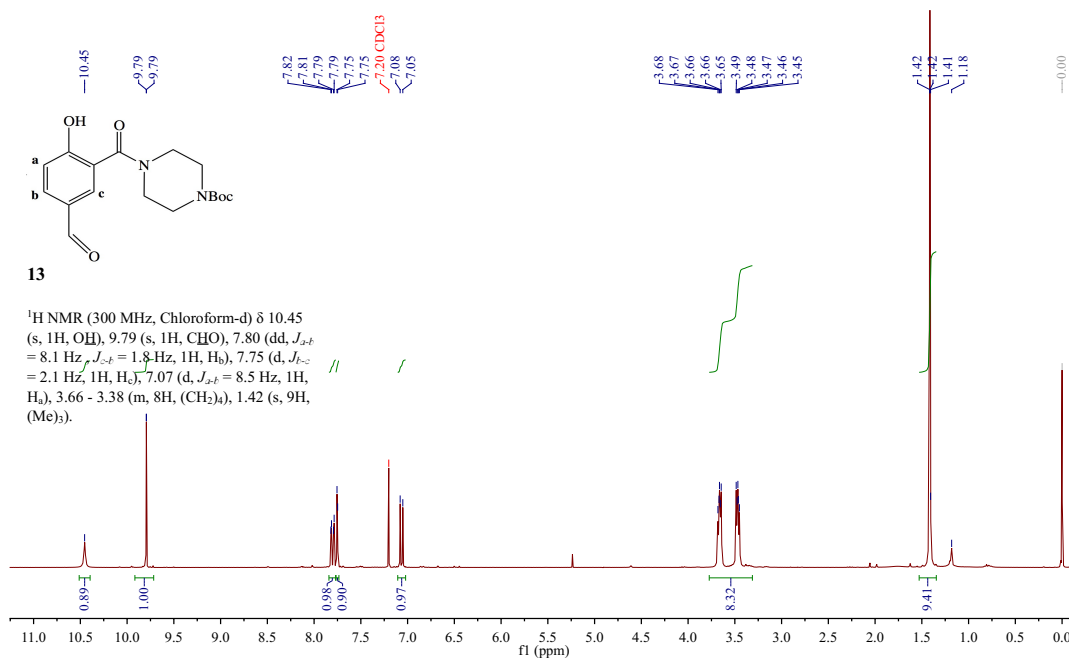

$^1\text{H}$  NMR spectrum of **2c'** ( $\text{CDCl}_3$ , 300 MHz)

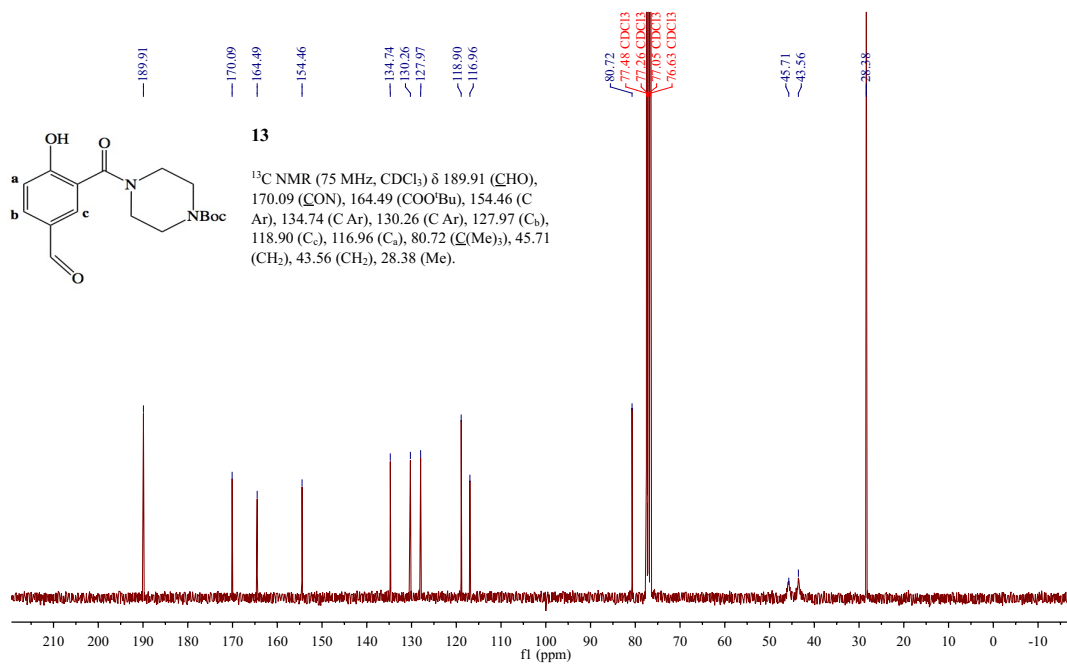

$^{13}\text{C}$  NMR spectrum of **2c'** ( $\text{CDCl}_3$ , 75 MHz)

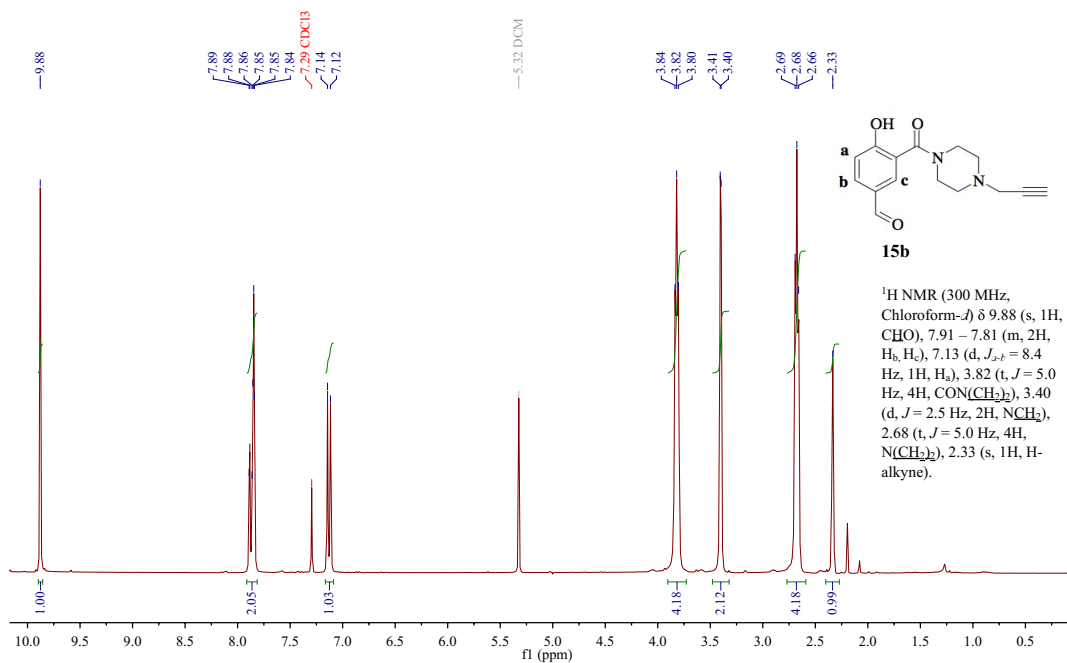

$^1\text{H}$  NMR spectrum of **2c** ( $\text{CDCl}_3$ , 300 MHz)

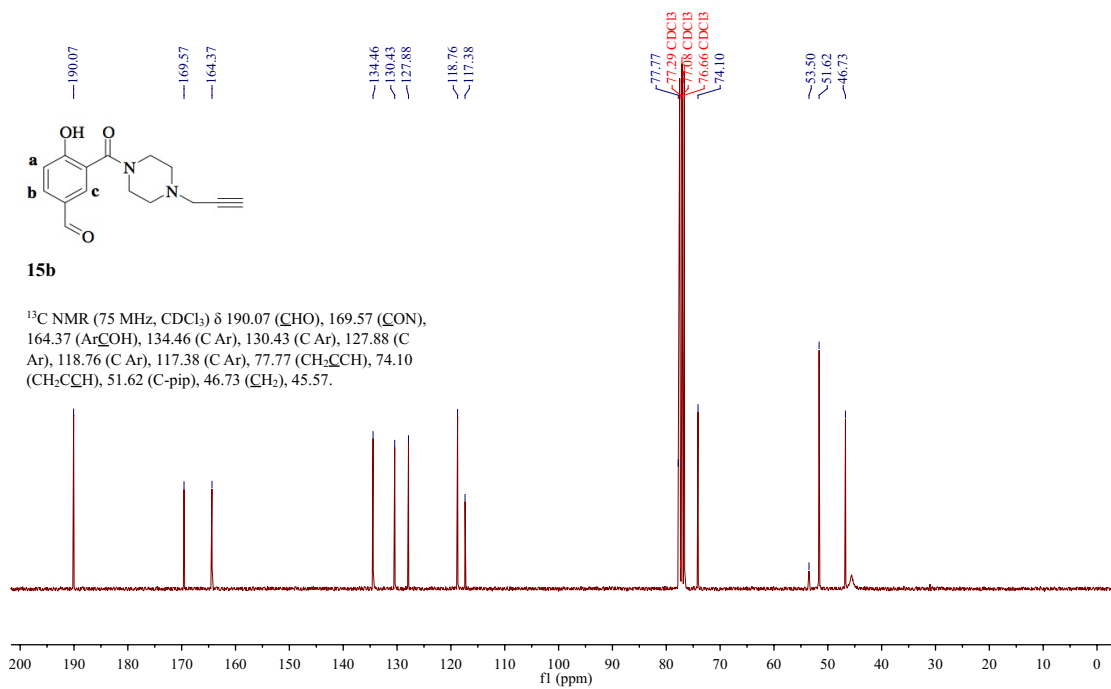

<sup>13</sup>C NMR spectrum of **2c** (CDCl<sub>3</sub>, 75 MHz)

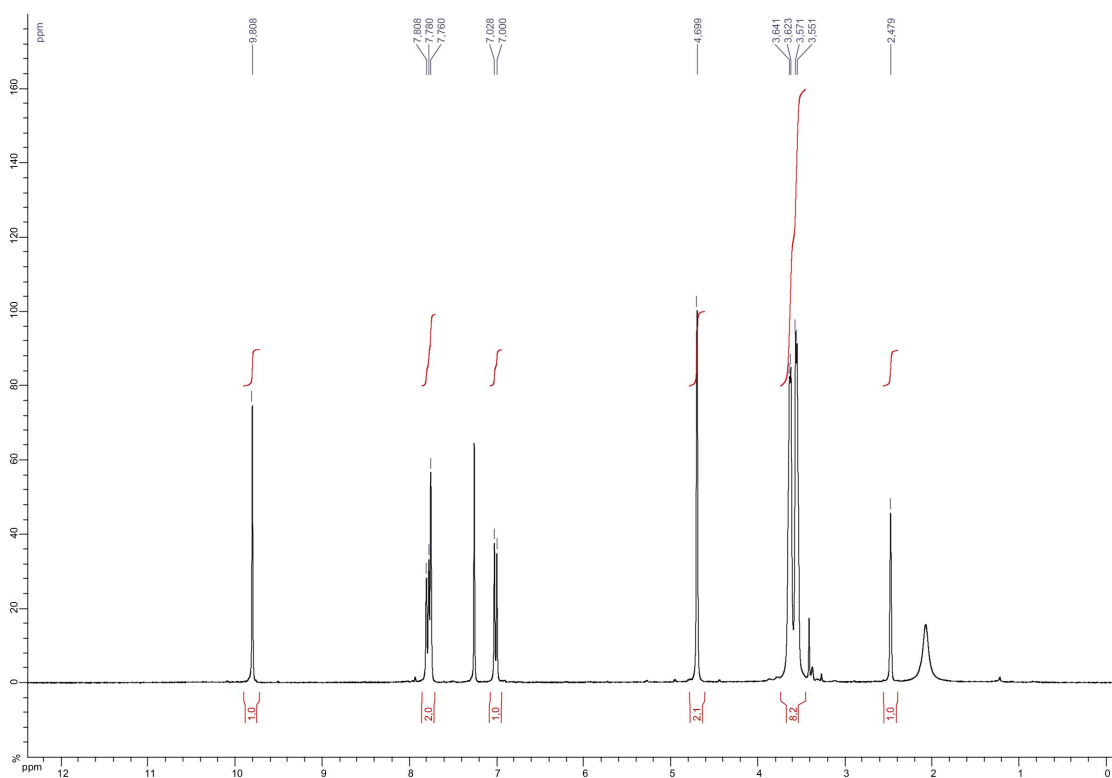

<sup>1</sup>H NMR spectrum of **2d** (CDCl<sub>3</sub>, 300 MHz)

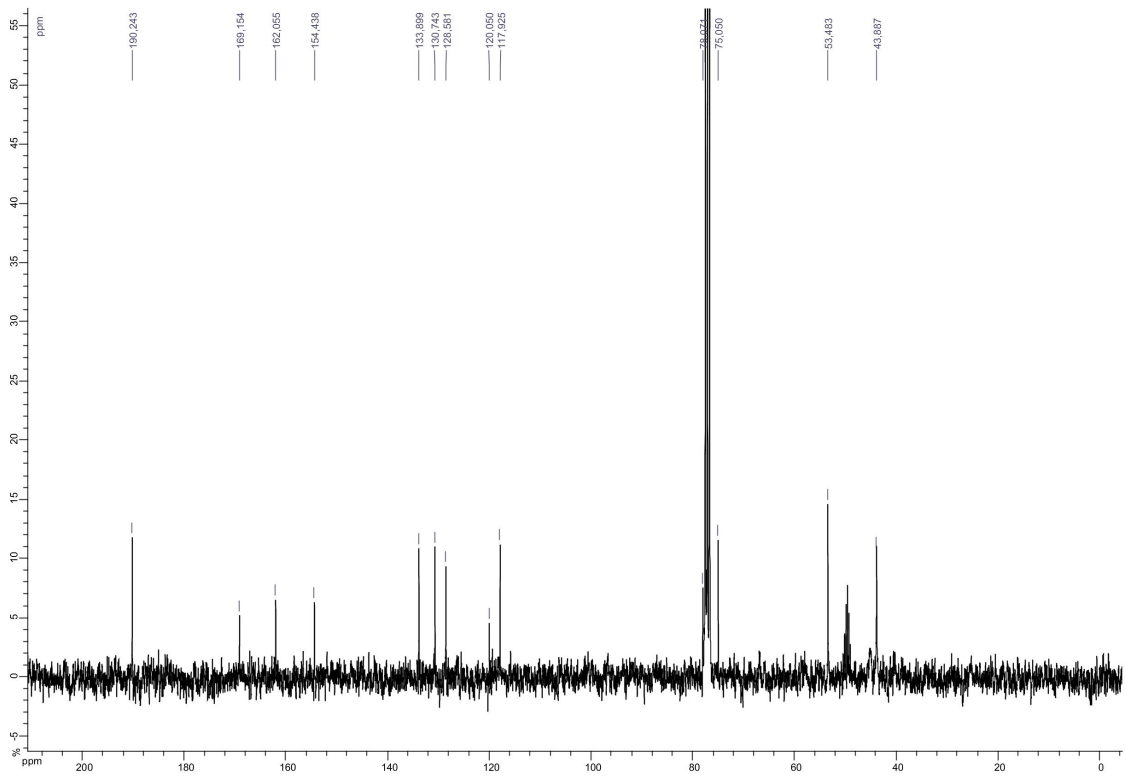

<sup>13</sup>C NMR spectrum of **2d** (CDCl<sub>3</sub>, 75 MHz)

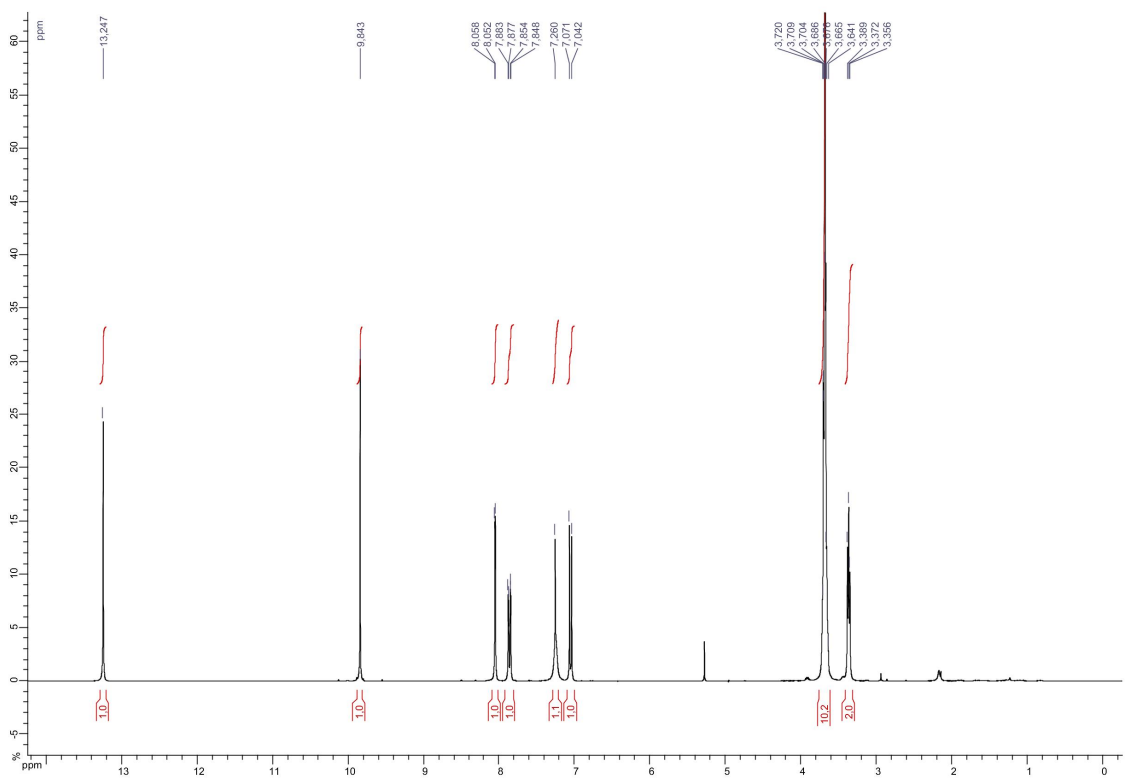

<sup>1</sup>H NMR spectrum of **2e** (CDCl<sub>3</sub>, 300 MHz)

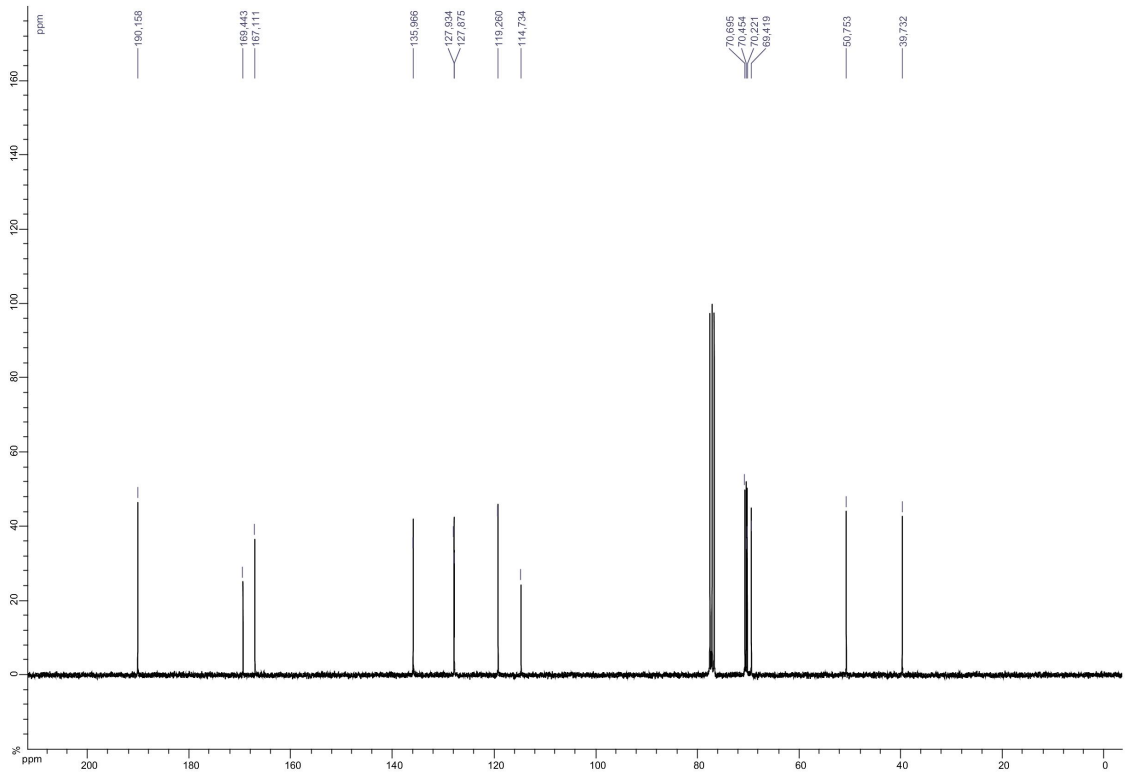

$^{13}\text{C}$  NMR spectrum of **2e** ( $\text{CDCl}_3$ , 75 MHz)

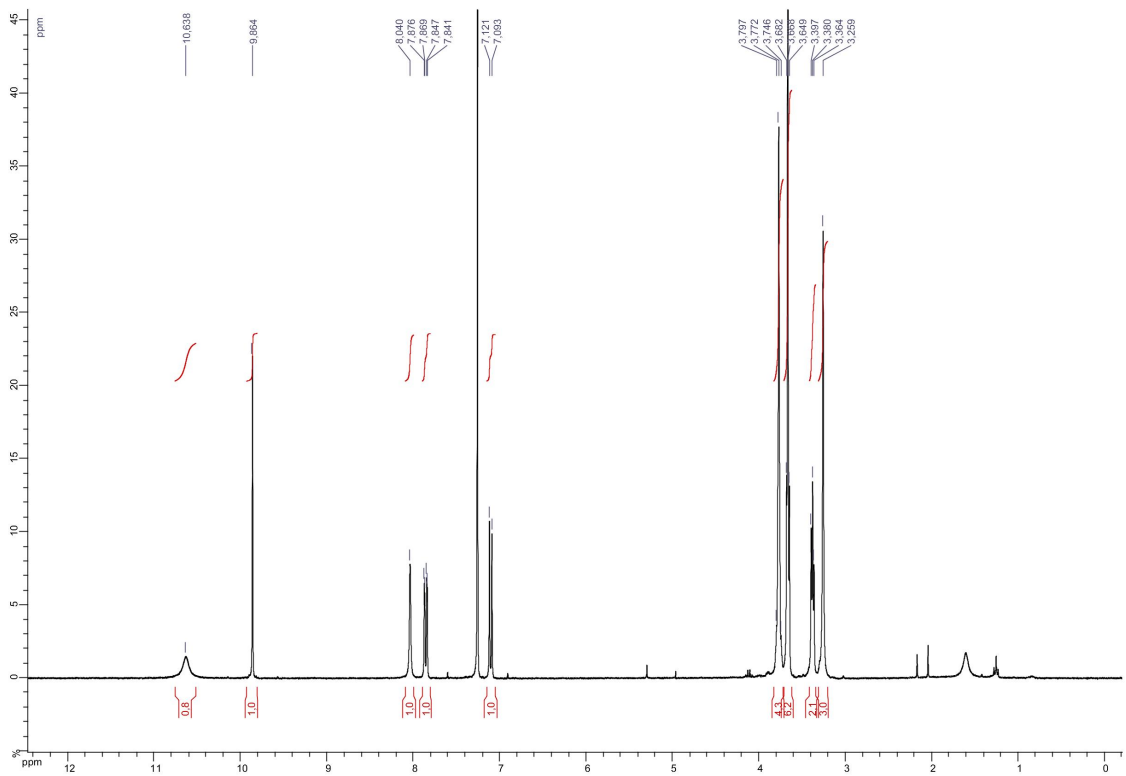

$^1\text{H}$  NMR spectrum of **2f** ( $\text{CDCl}_3$ , 300 MHz)

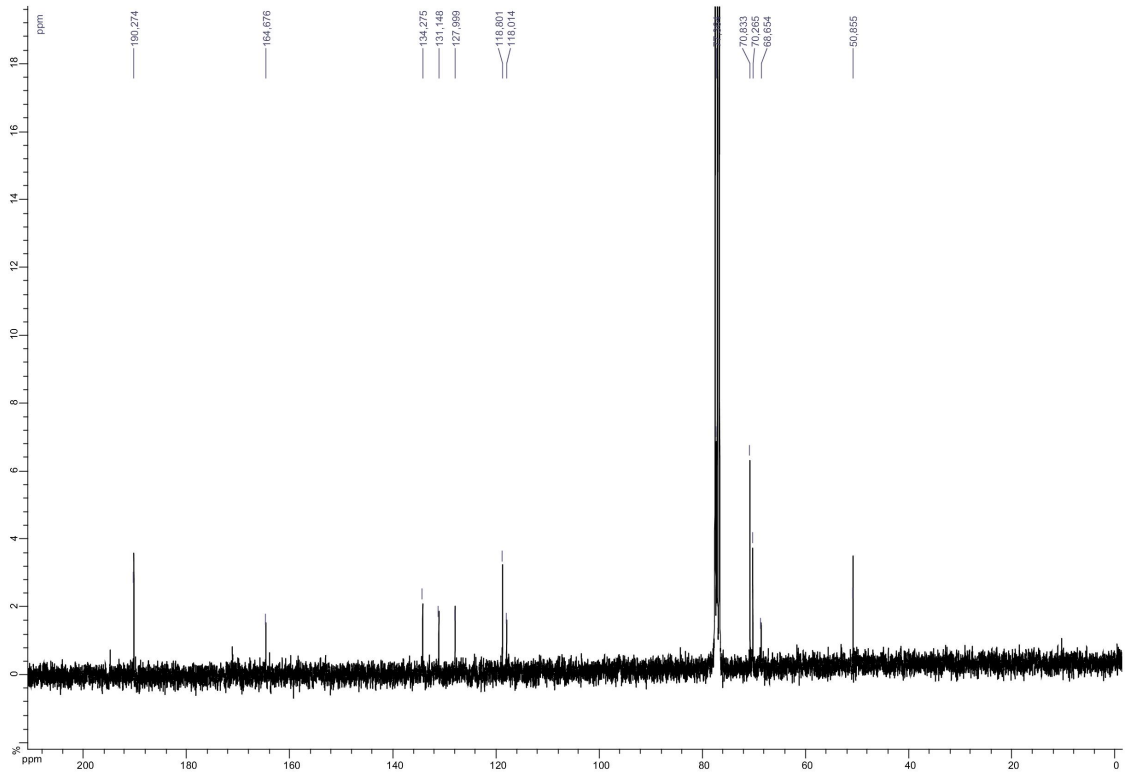

$^{13}\text{C}$  NMR spectrum of **2f** ( $\text{CDCl}_3$ , 75 MHz)

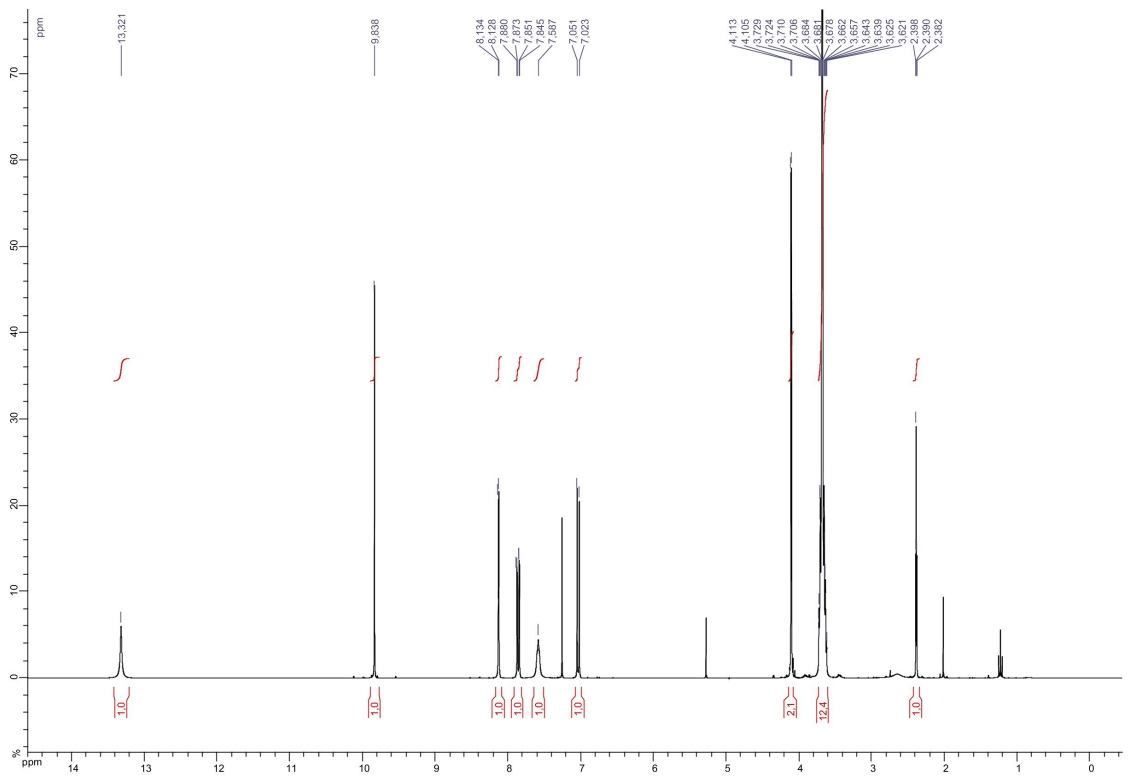

$^1\text{H}$  NMR spectrum of **2g** ( $\text{CDCl}_3$ , 300 MHz)

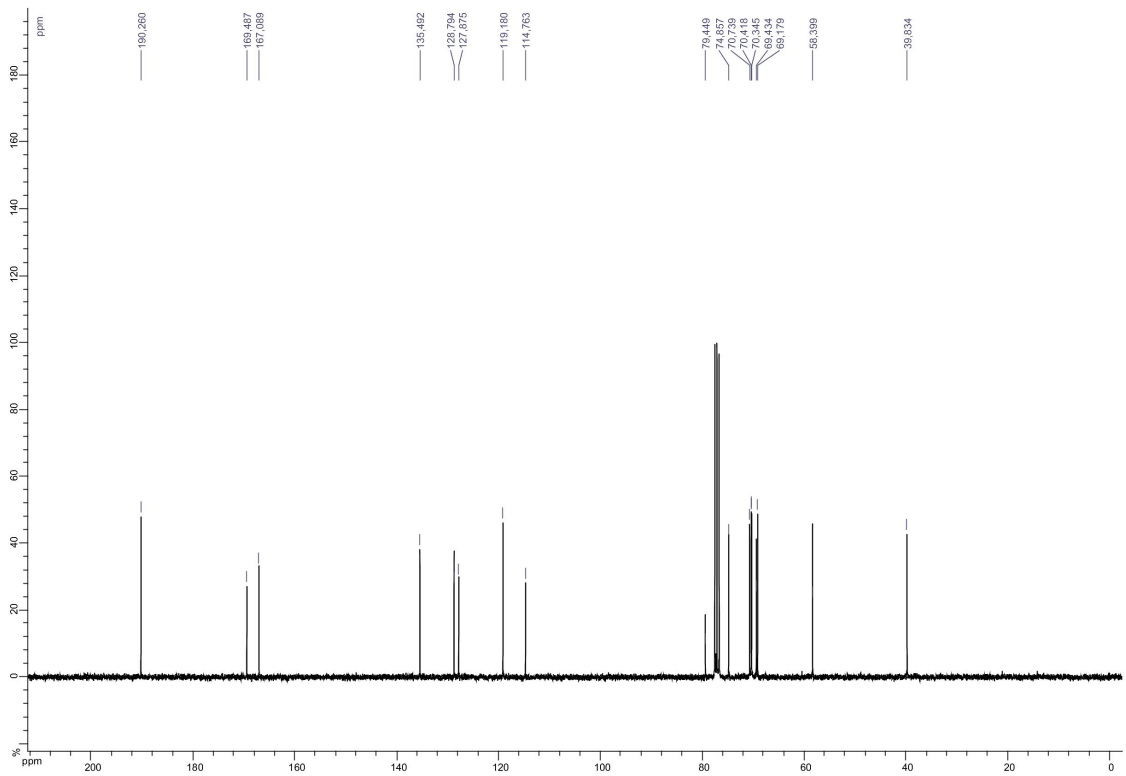

<sup>13</sup>C NMR spectrum of **2g** (CDCl<sub>3</sub>, 75 MHz)

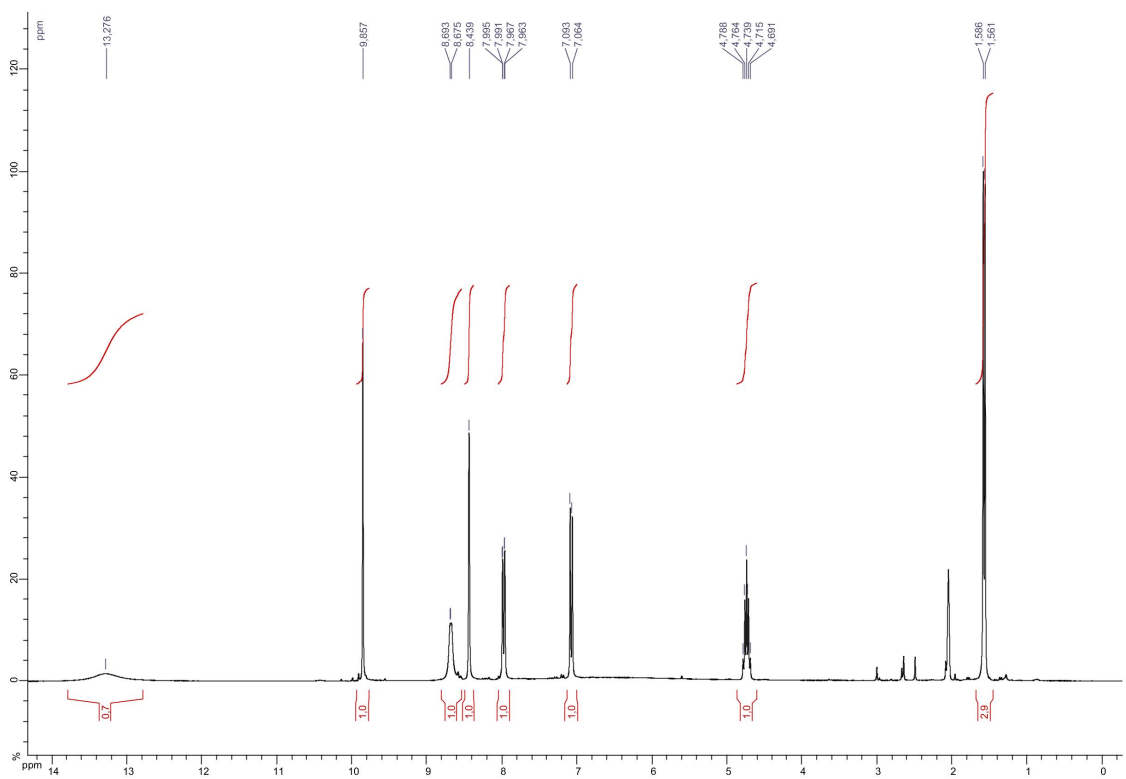

<sup>1</sup>H NMR spectrum of **2h** (CDCl<sub>3</sub>, 300 MHz)

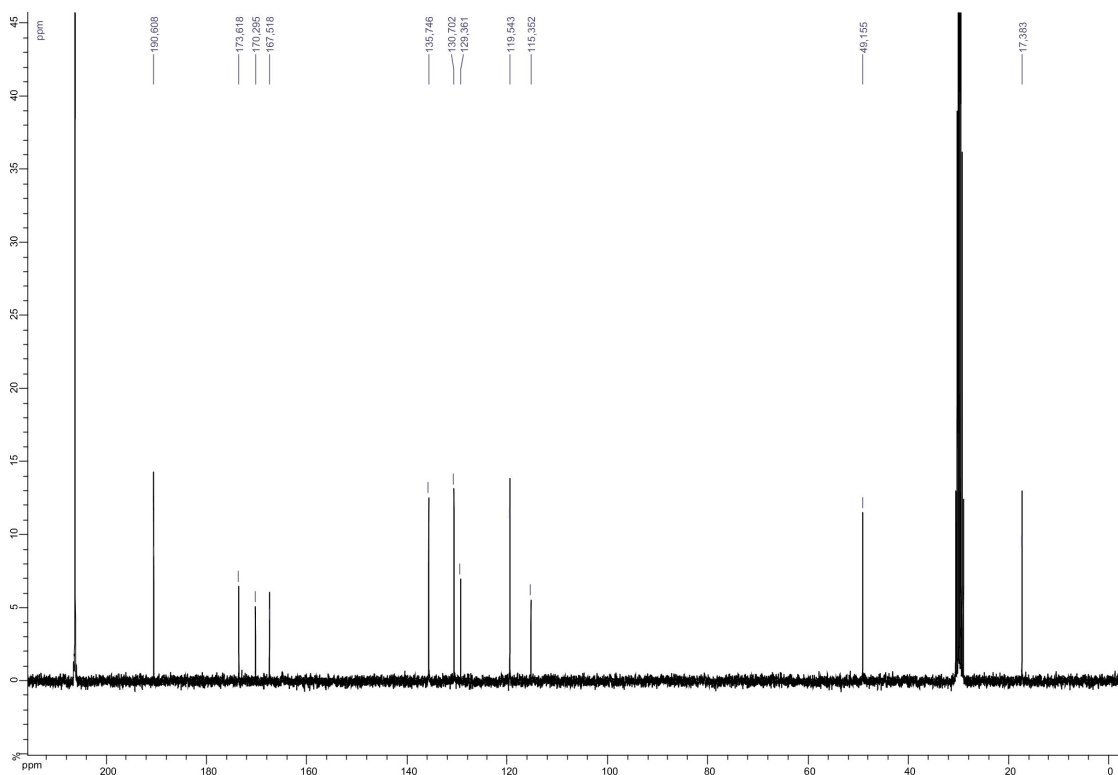

<sup>13</sup>C NMR spectrum of **2h** (CDCl<sub>3</sub>, 75 MHz)

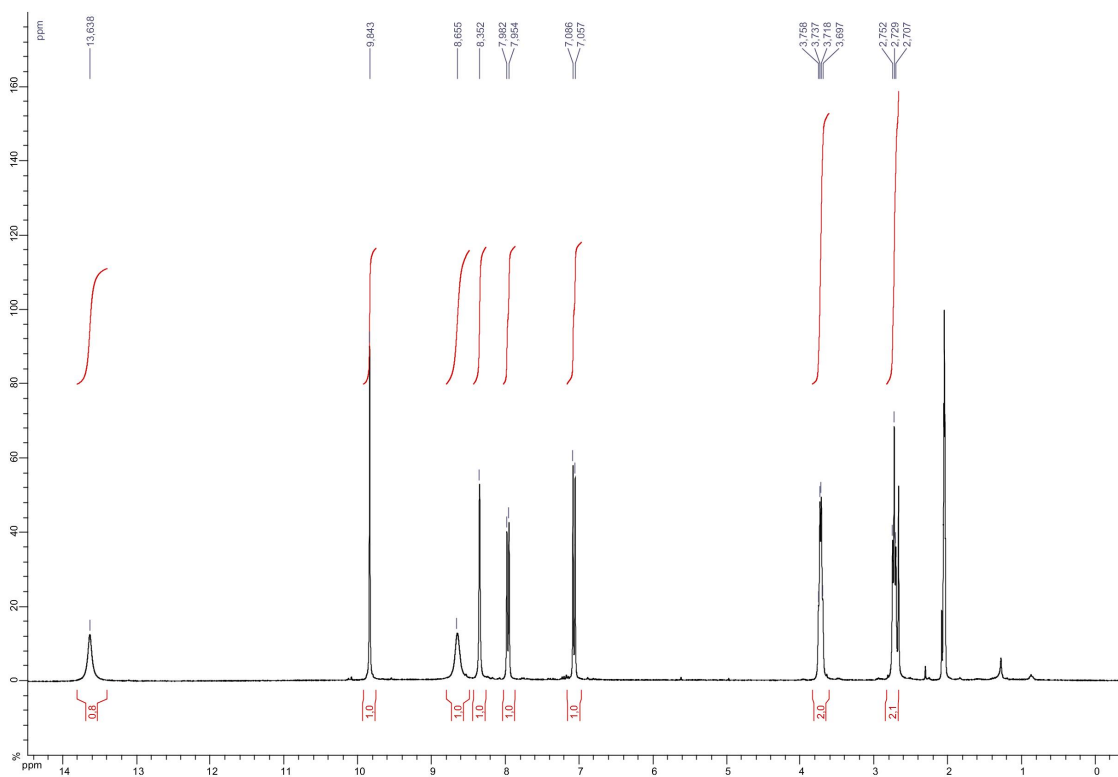

<sup>1</sup>H NMR spectrum of **2i** (CDCl<sub>3</sub>, 300 MHz)



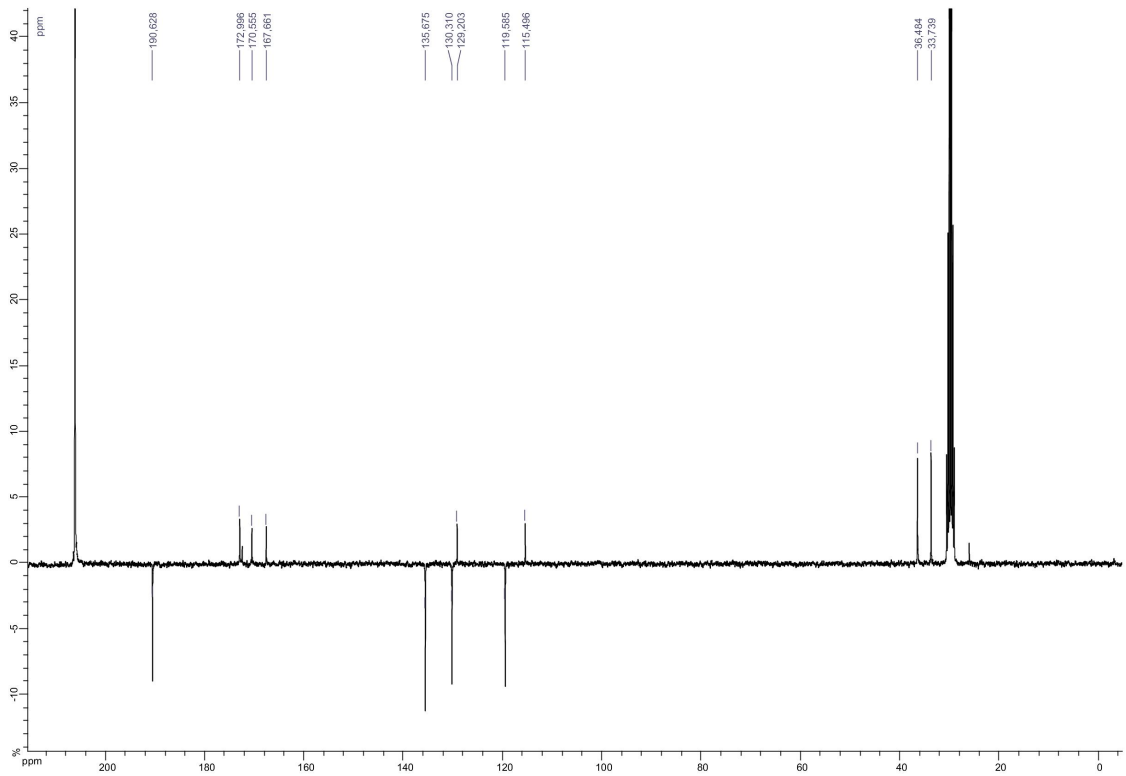

$^{13}\text{C}$  NMR (JMOD) spectrum of **2i** ( $\text{CDCl}_3$ , 75 MHz)

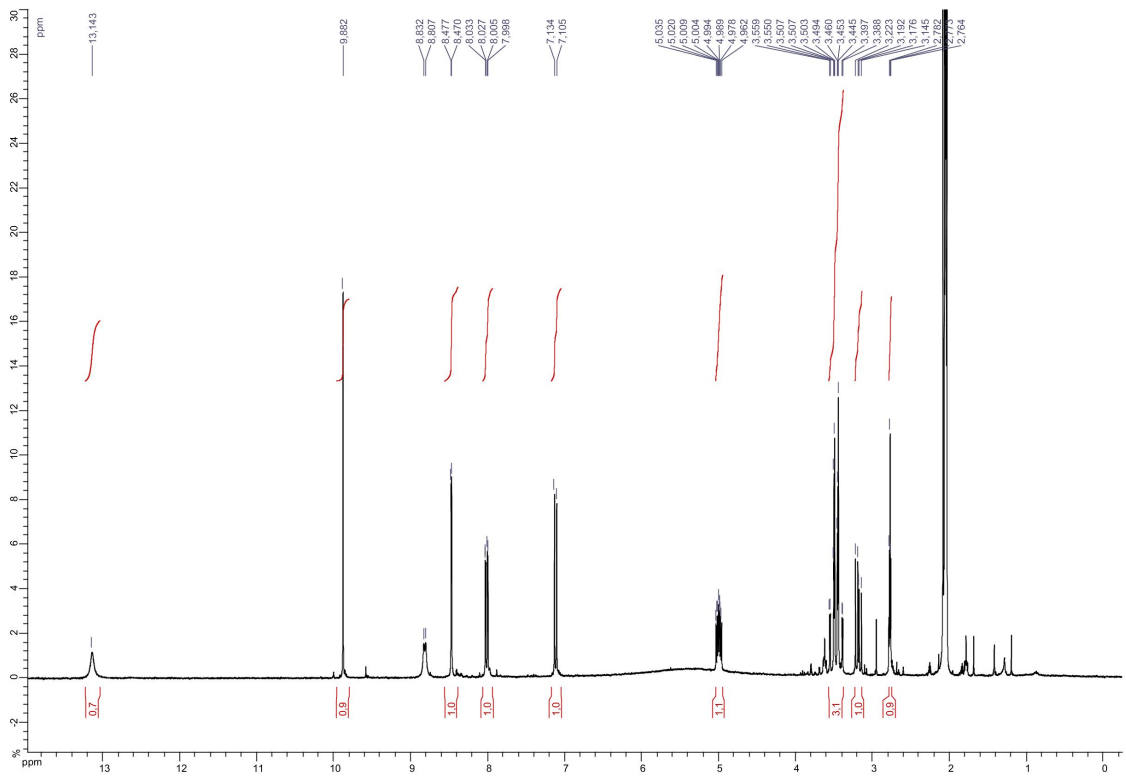

$^1\text{H}$  NMR spectrum of **2j** ( $\text{CDCl}_3$ , 300 MHz)

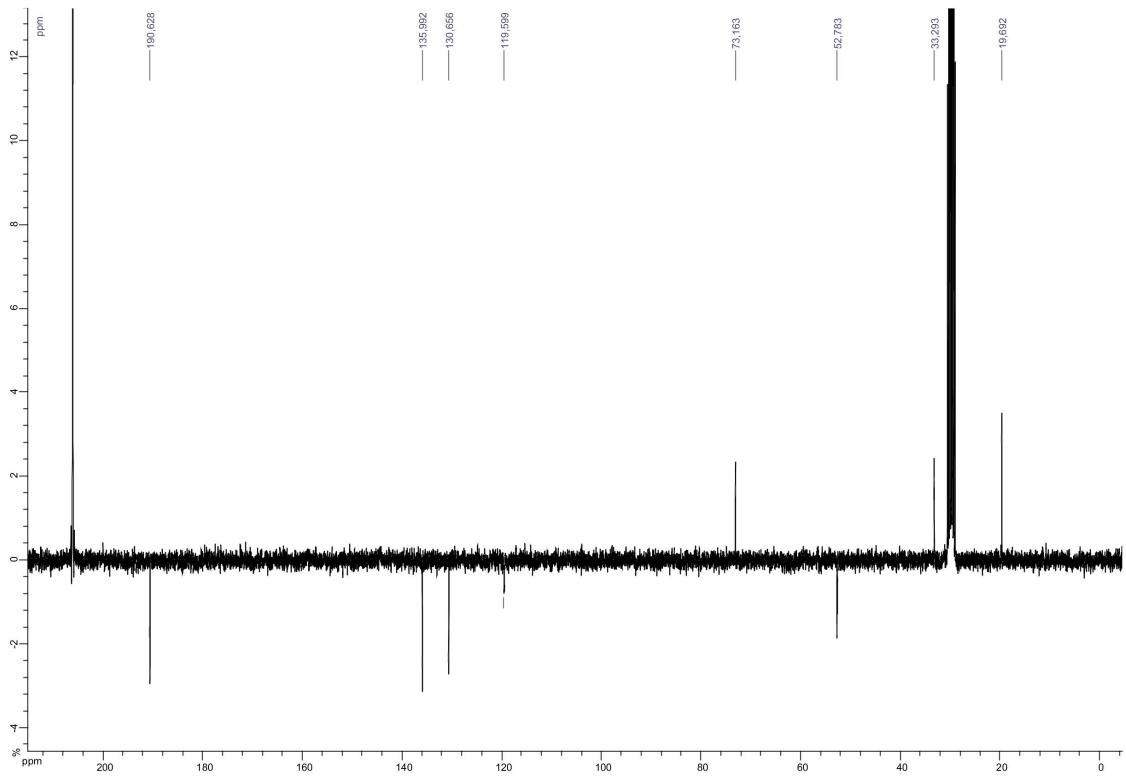

$^{13}\text{C}$  NMR (JMOD) spectrum of **2j** ( $\text{CDCl}_3$ , 75 MHz)

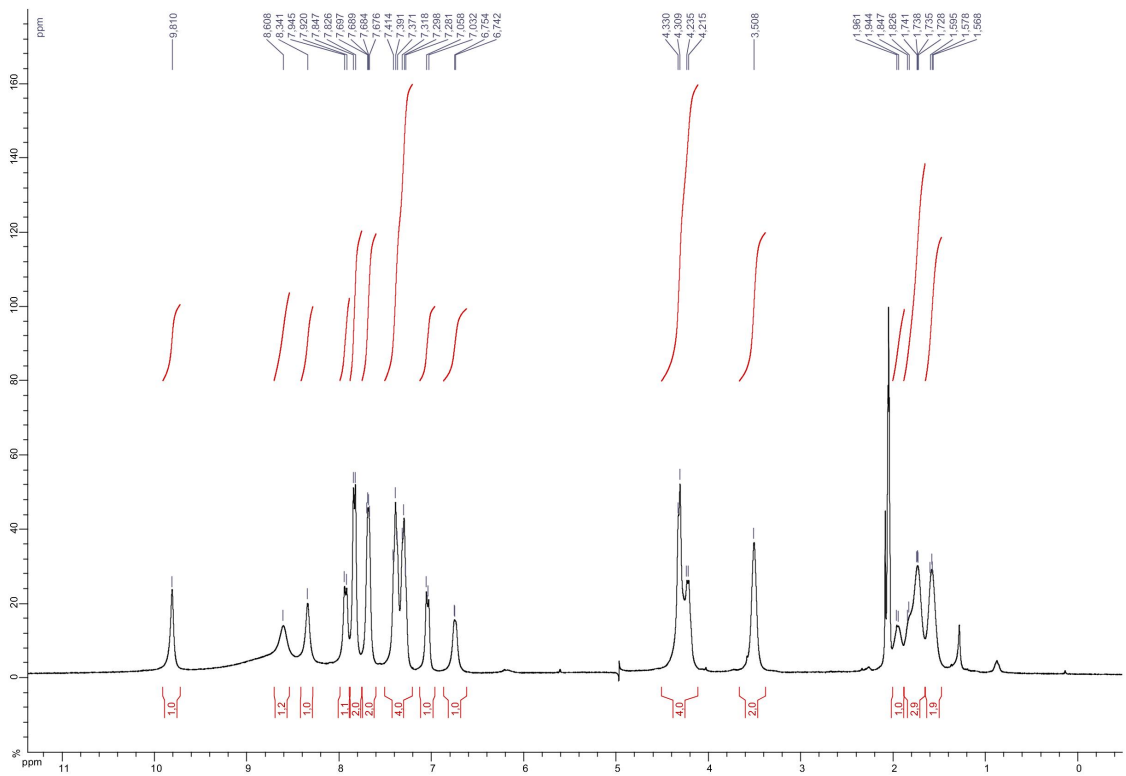

$^1\text{H}$  NMR spectrum of **2k** ( $(\text{CD}_3)_3\text{CO}$ , 300 MHz)

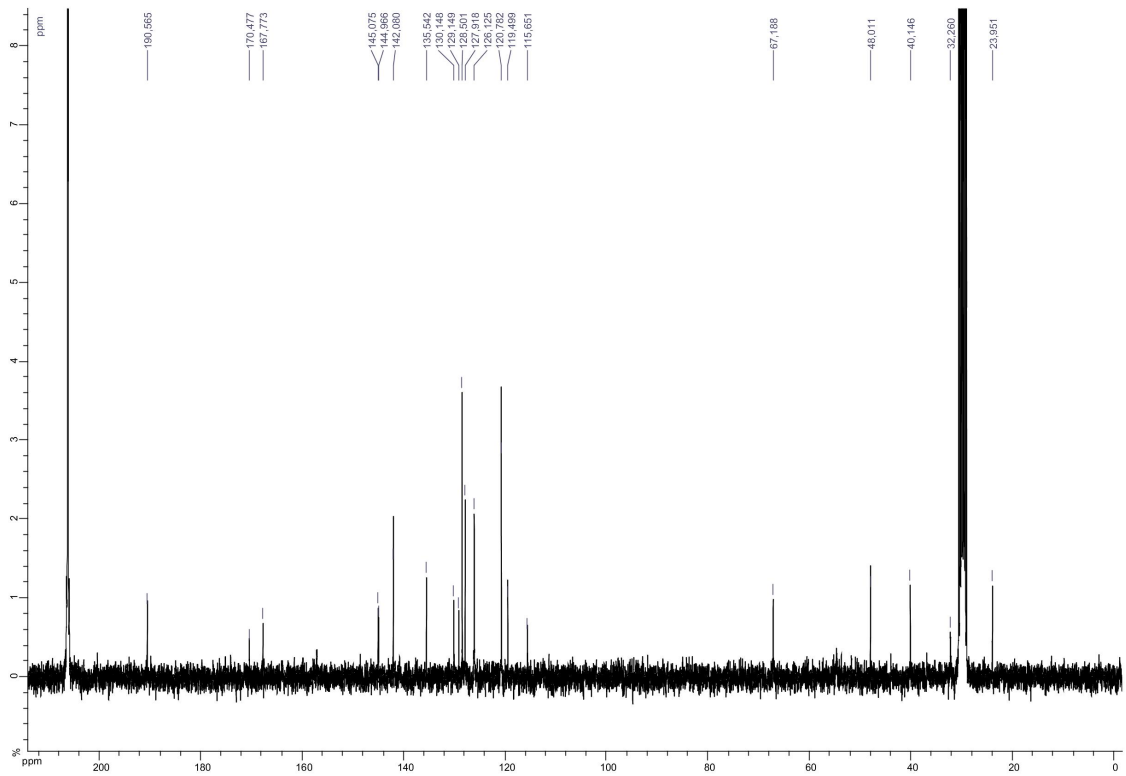

$^{13}\text{C}$  NMR spectrum of **2k** ( $(\text{CD}_3)_3\text{CO}$ , 75 MHz)

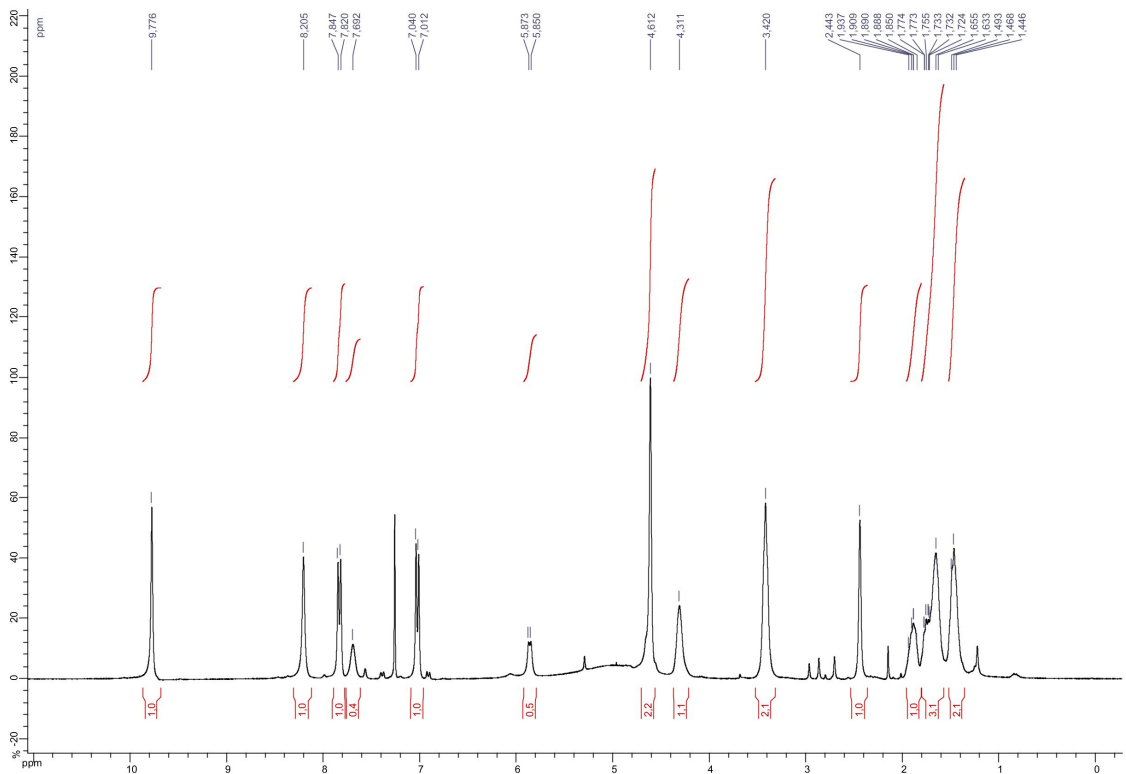

$^1\text{H}$  NMR spectrum of **2l** ( $\text{CDCl}_3$ , 300 MHz)

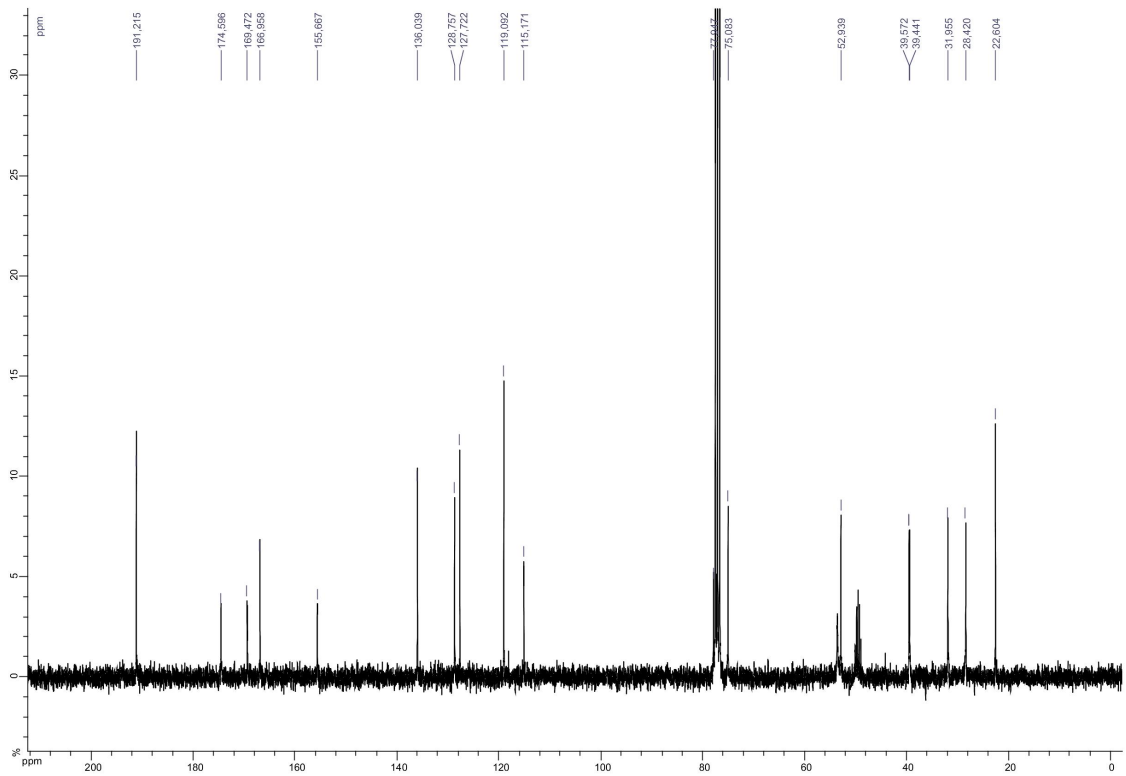

$^{13}\text{C}$  NMR spectrum of **2l** ( $\text{CDCl}_3 + \epsilon\text{CD}_3\text{OD}$ , 75 MHz)

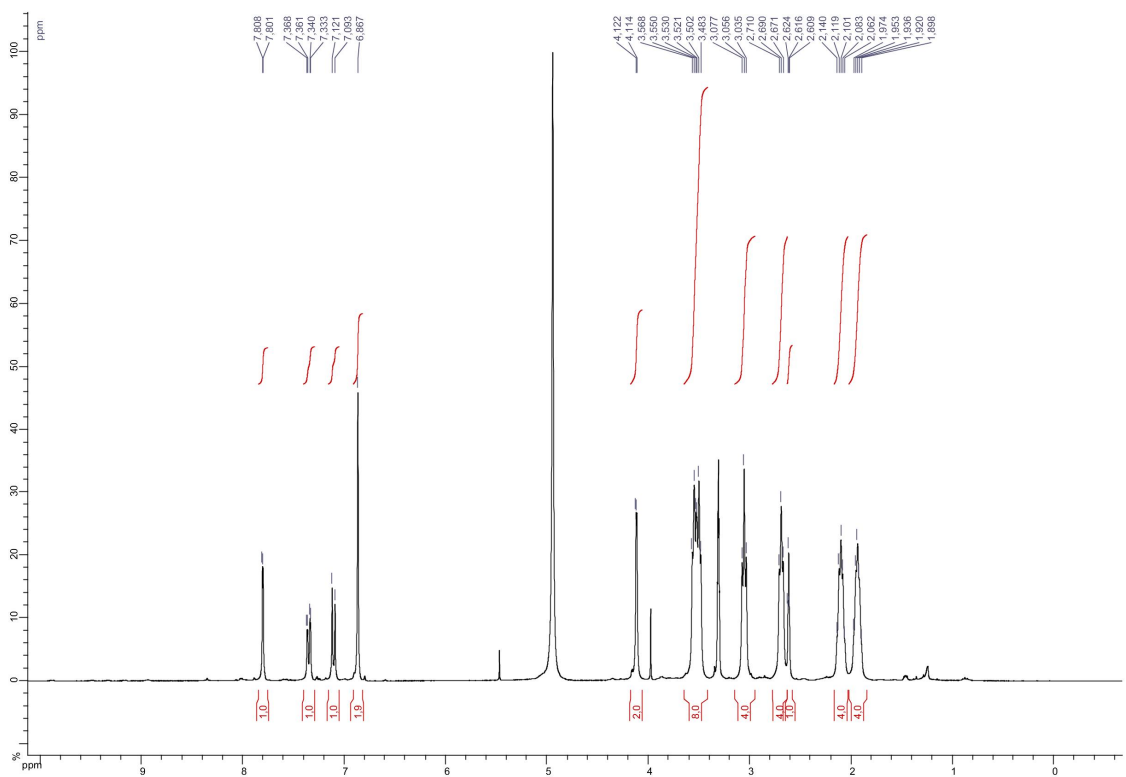

$^1\text{H}$  NMR spectrum of **2b** ( $\text{CD}_3\text{OD}$ , 300 MHz)

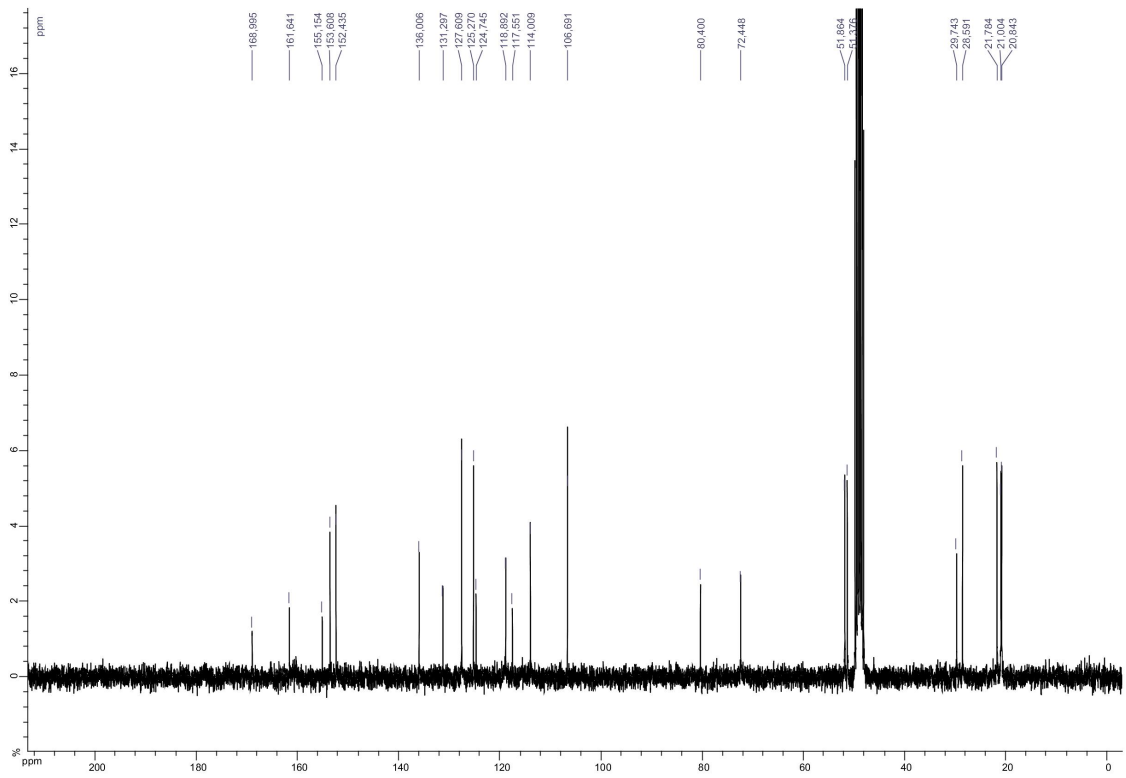

$^{13}\text{C}$  NMR spectrum of **2b** ( $\text{CD}_3\text{OD}$ , 75 MHz)

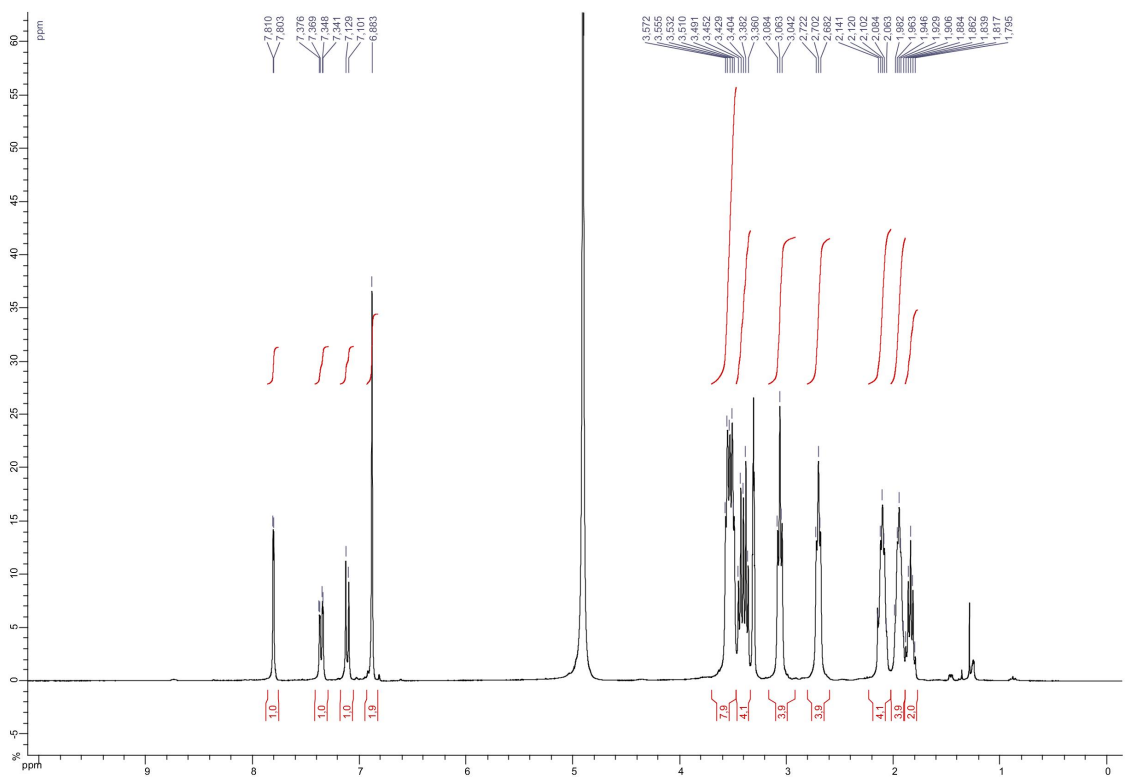

$^1\text{H}$  NMR spectrum of **3b** ( $\text{CD}_3\text{OD}$ , 300 MHz)

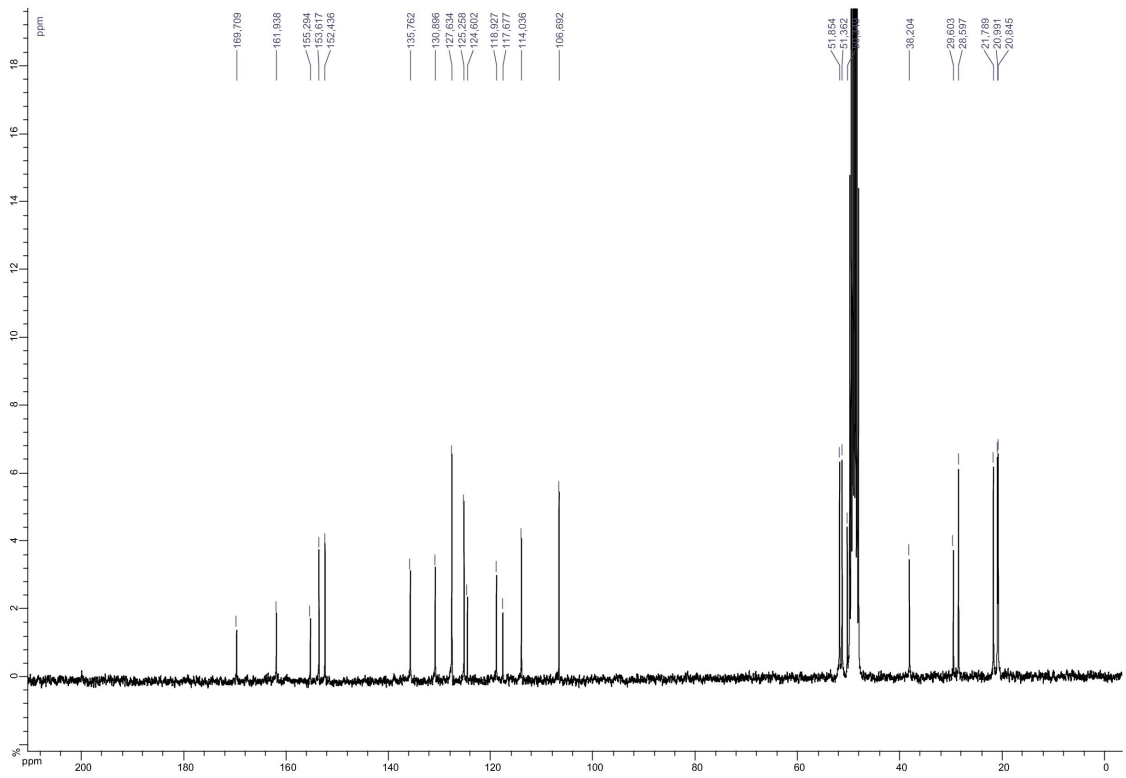

<sup>13</sup>C NMR spectrum of **3b** (CD<sub>3</sub>OD, 75 MHz)

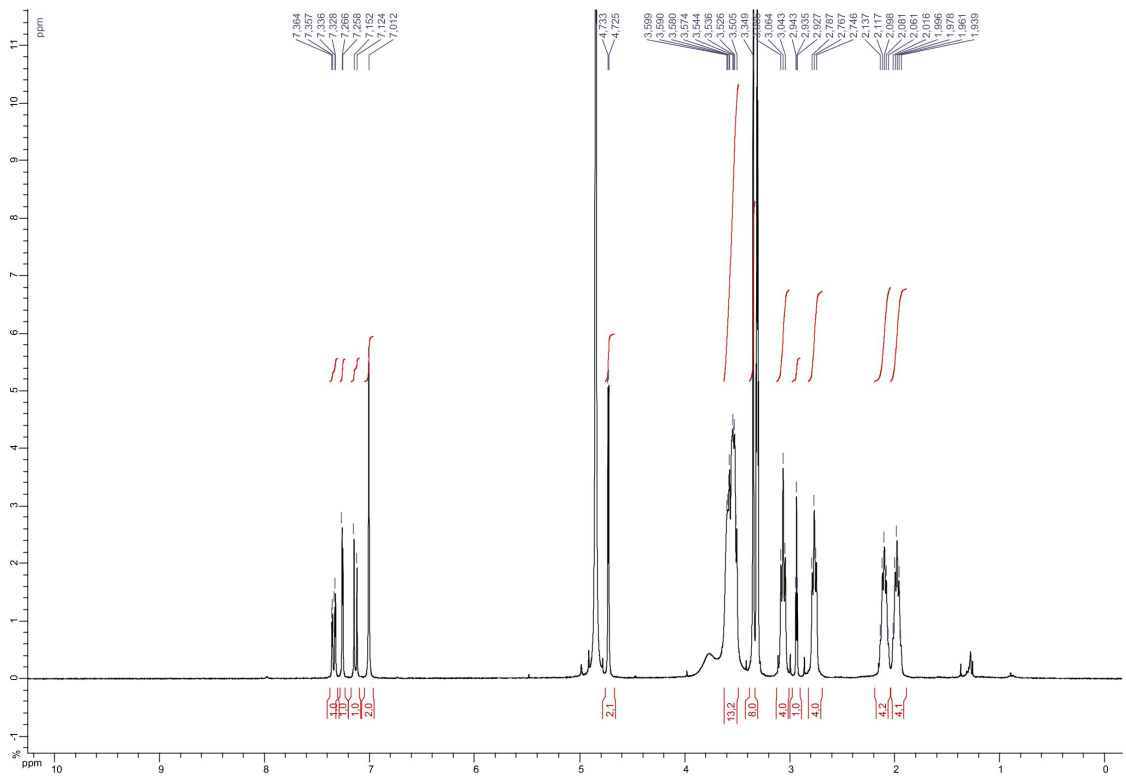

<sup>1</sup>H NMR spectrum of **4b** (CD<sub>3</sub>OD, 300 MHz)

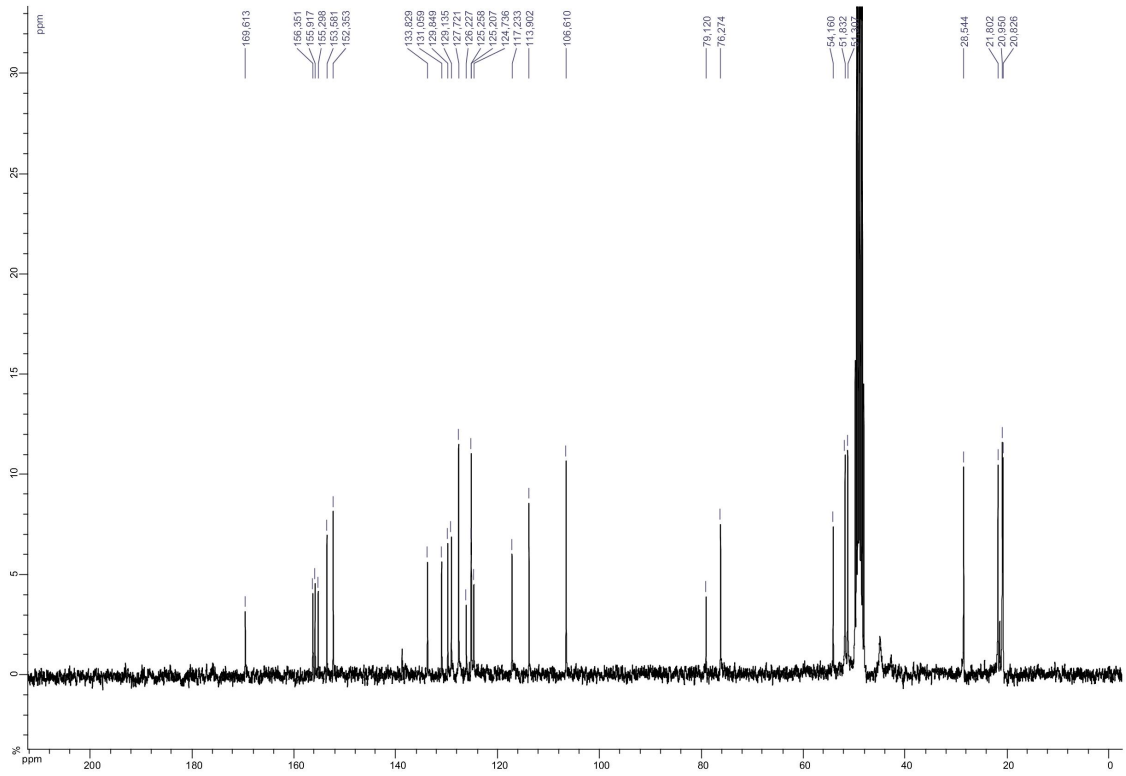

<sup>13</sup>C NMR spectrum of **4b** (CD<sub>3</sub>OD, 75 MHz)

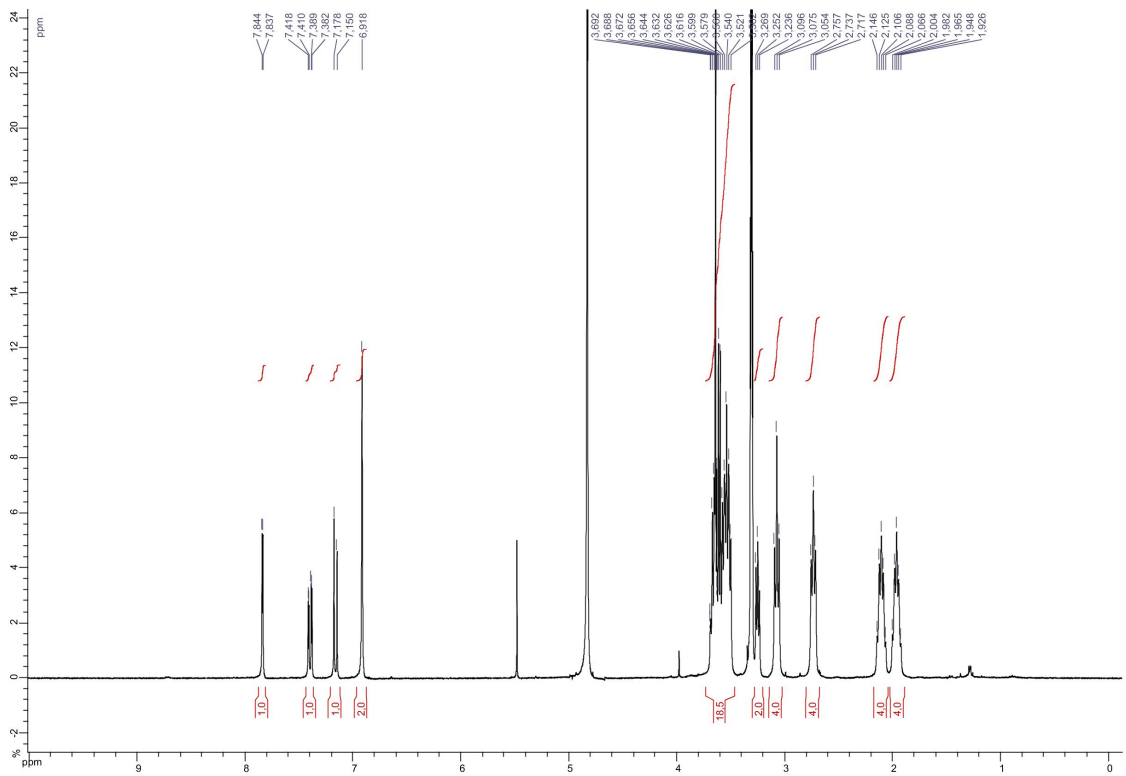

<sup>1</sup>H NMR spectrum of **5b** (CD<sub>3</sub>OD, 300 MHz)

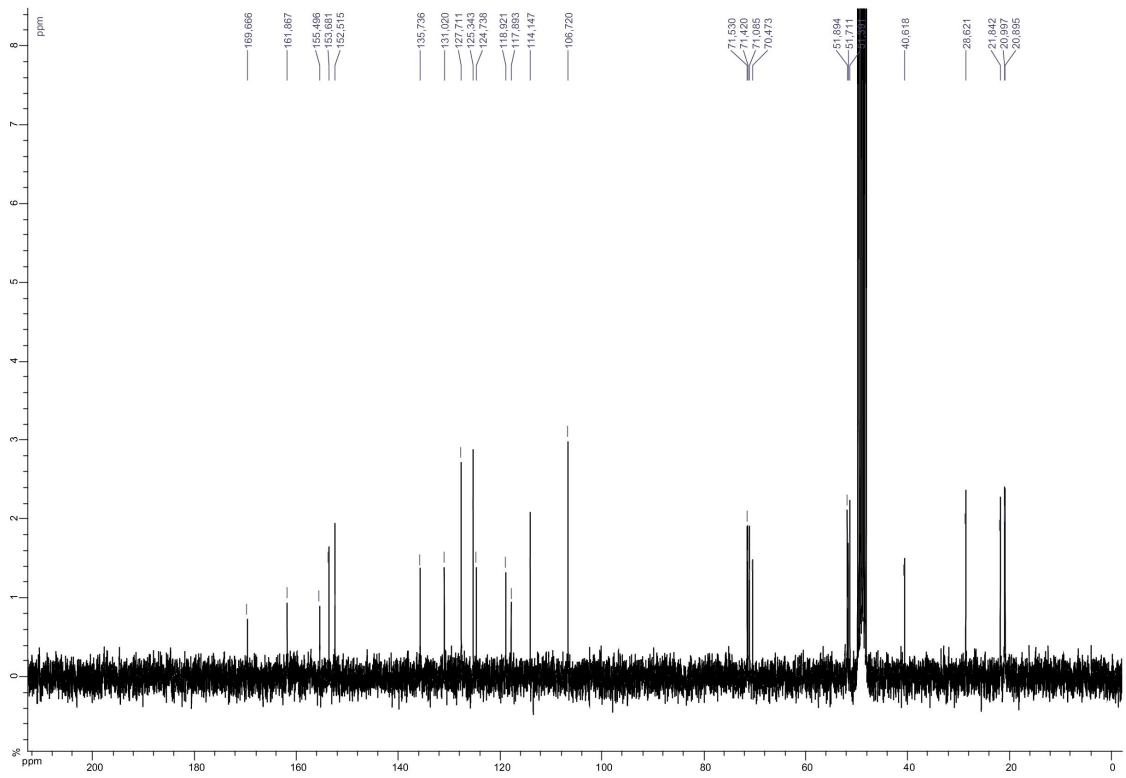

$^{13}\text{C}$  NMR spectrum of **5b** ( $\text{CD}_3\text{OD}$ , 75 MHz)

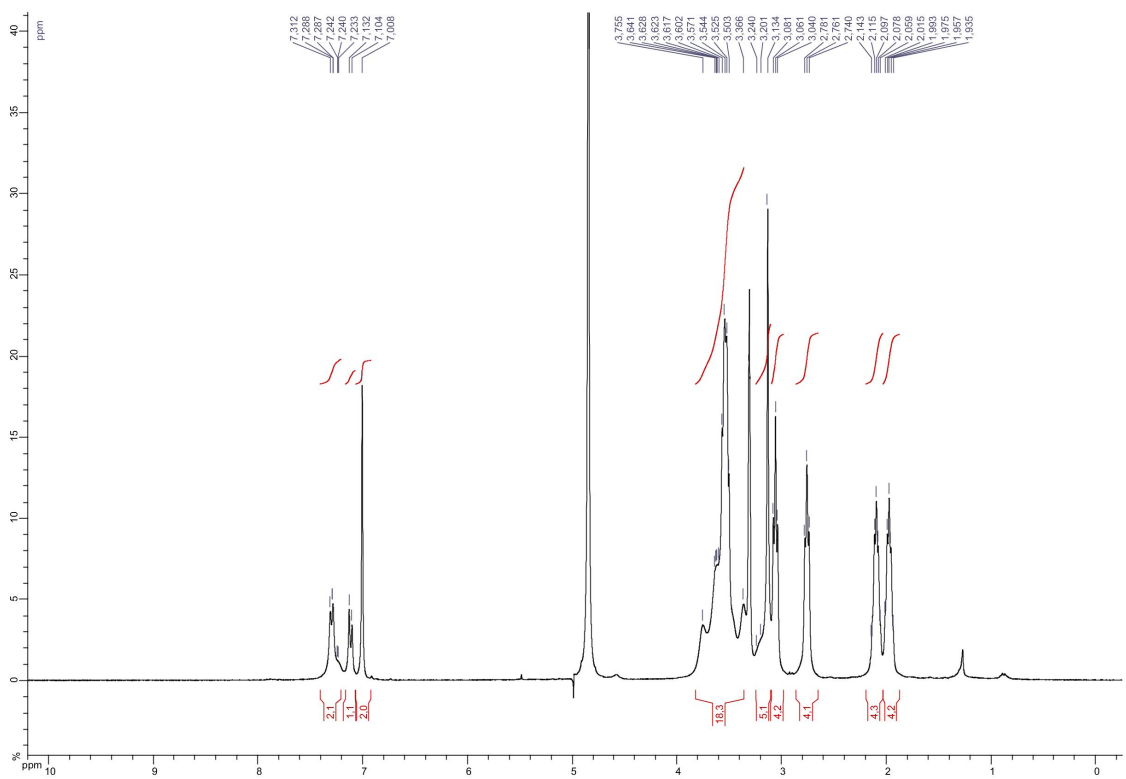

$^1\text{H}$  NMR spectrum of **6b** ( $\text{CD}_3\text{OD}$ , 300 MHz)



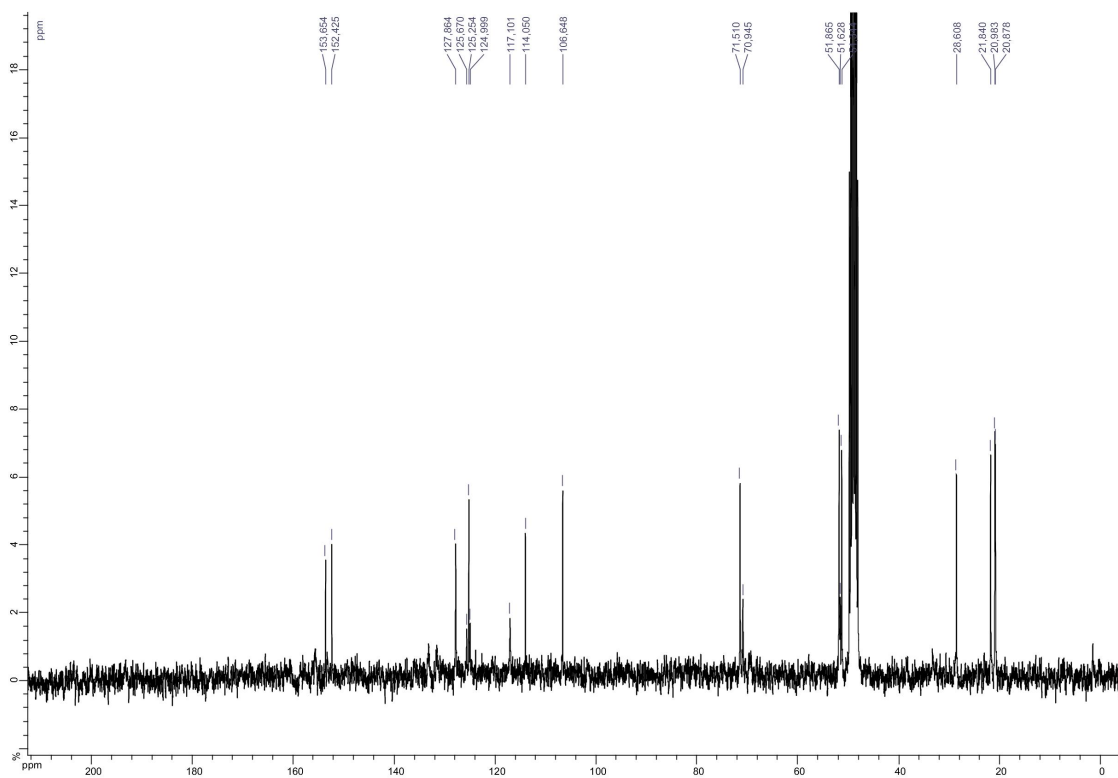

$^{13}\text{C}$  NMR spectrum of **6b** (CD<sub>3</sub>OD, 75 MHz)

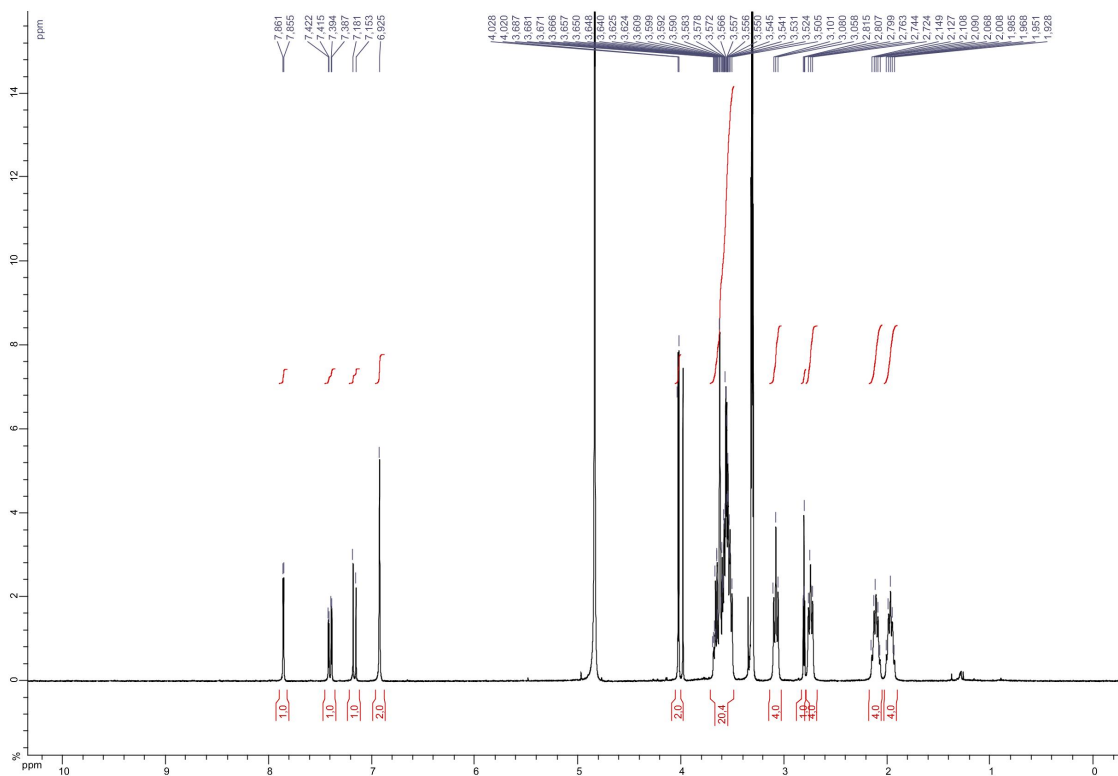

$^1\text{H}$  NMR spectrum of **7b** (CD<sub>3</sub>OD, 300 MHz)

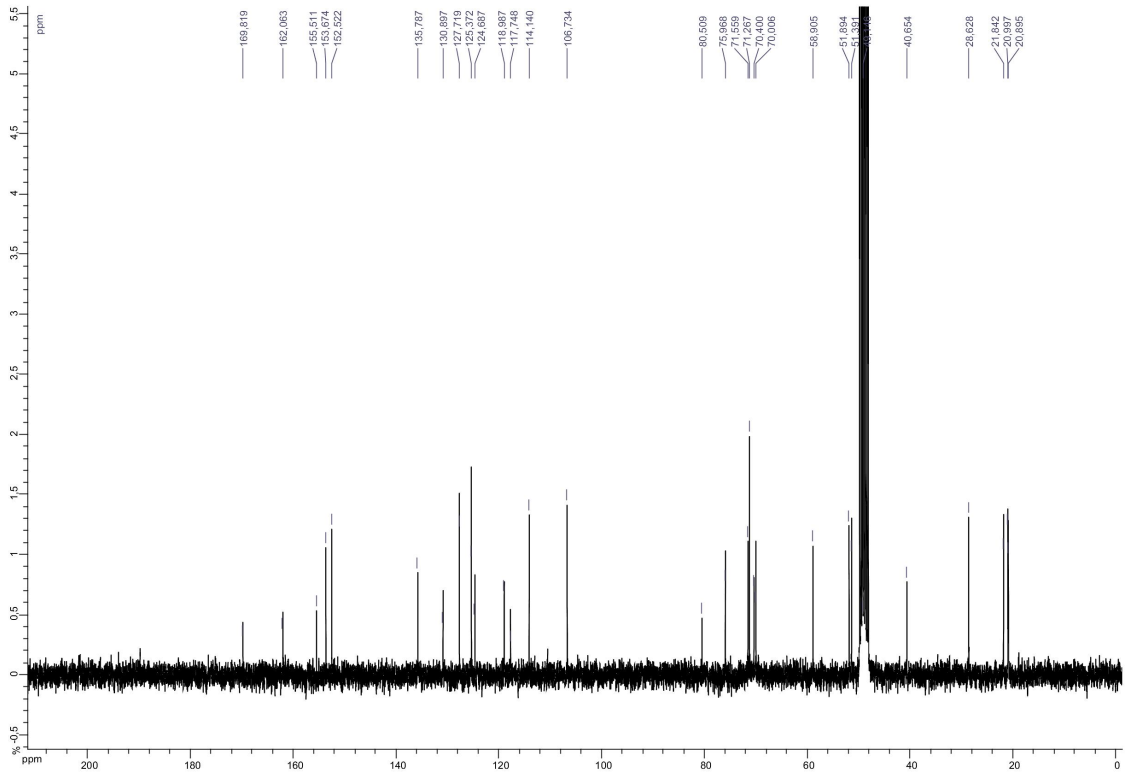

$^{13}\text{C}$  NMR spectrum of **7b** ( $\text{CD}_3\text{OD}$ , 75 MHz)

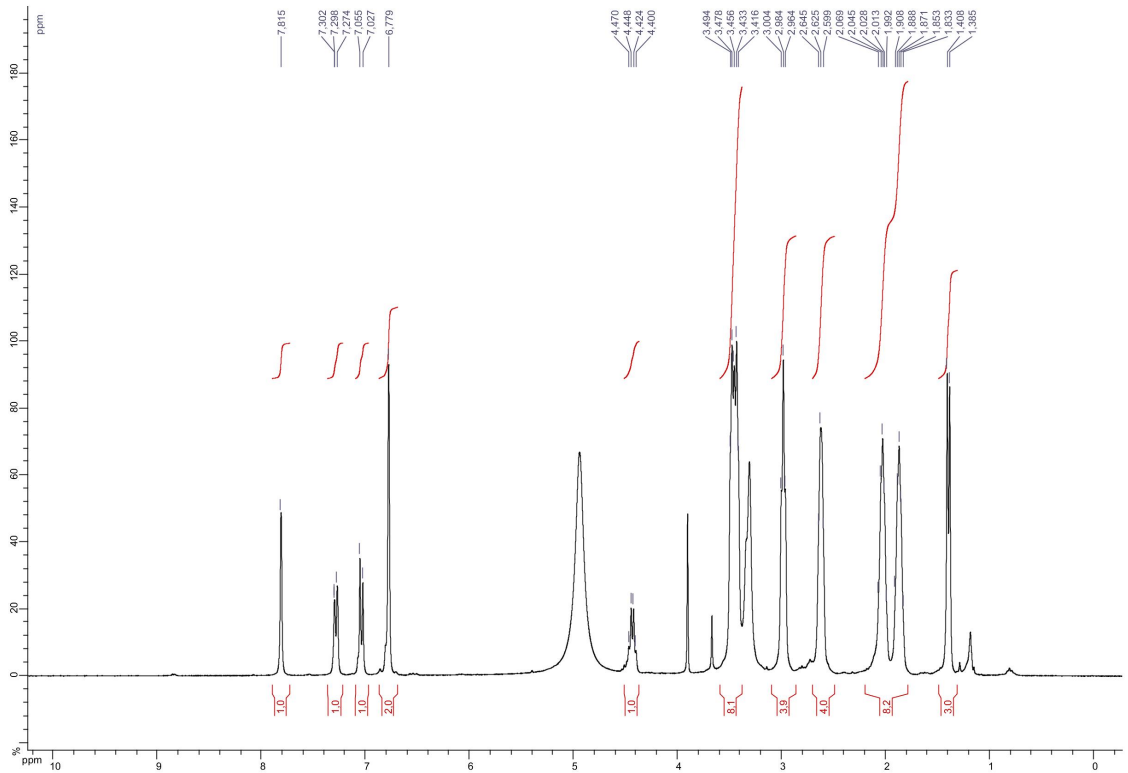

$^1\text{H}$  NMR spectrum of **8b** ( $\text{CD}_3\text{OD}$ , 300 MHz)

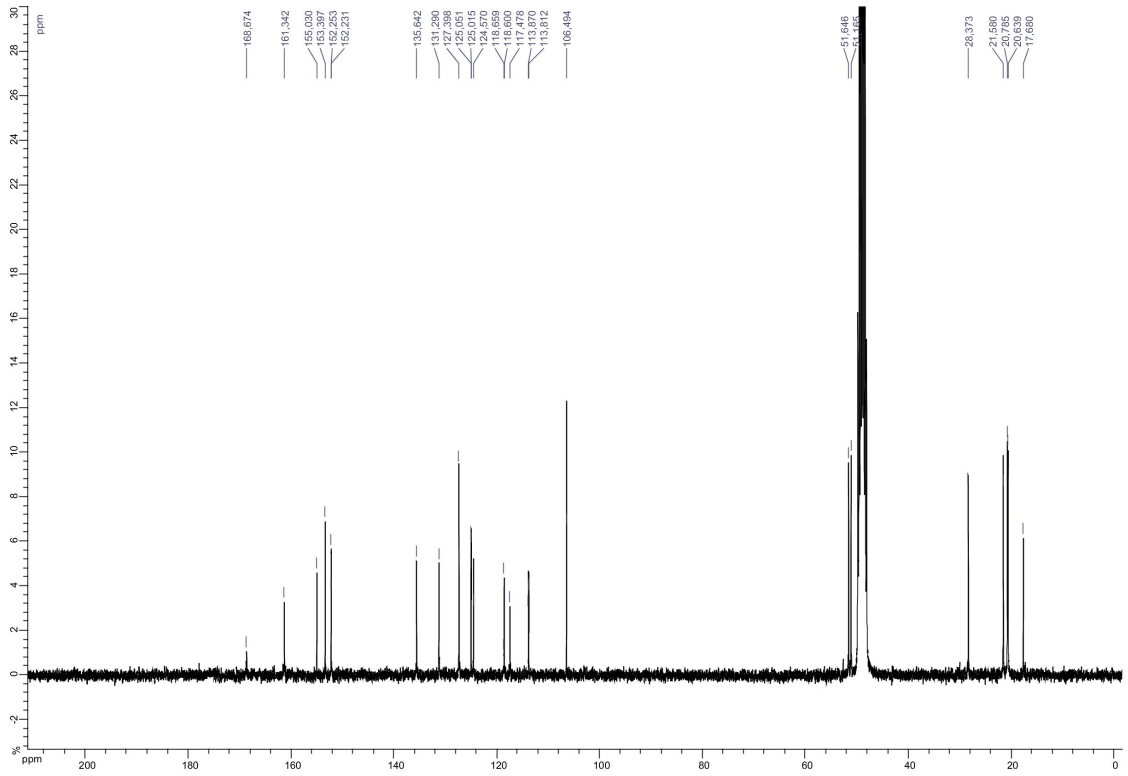

<sup>13</sup>C NMR spectrum of **8b** (CD<sub>3</sub>OD, 75 MHz)

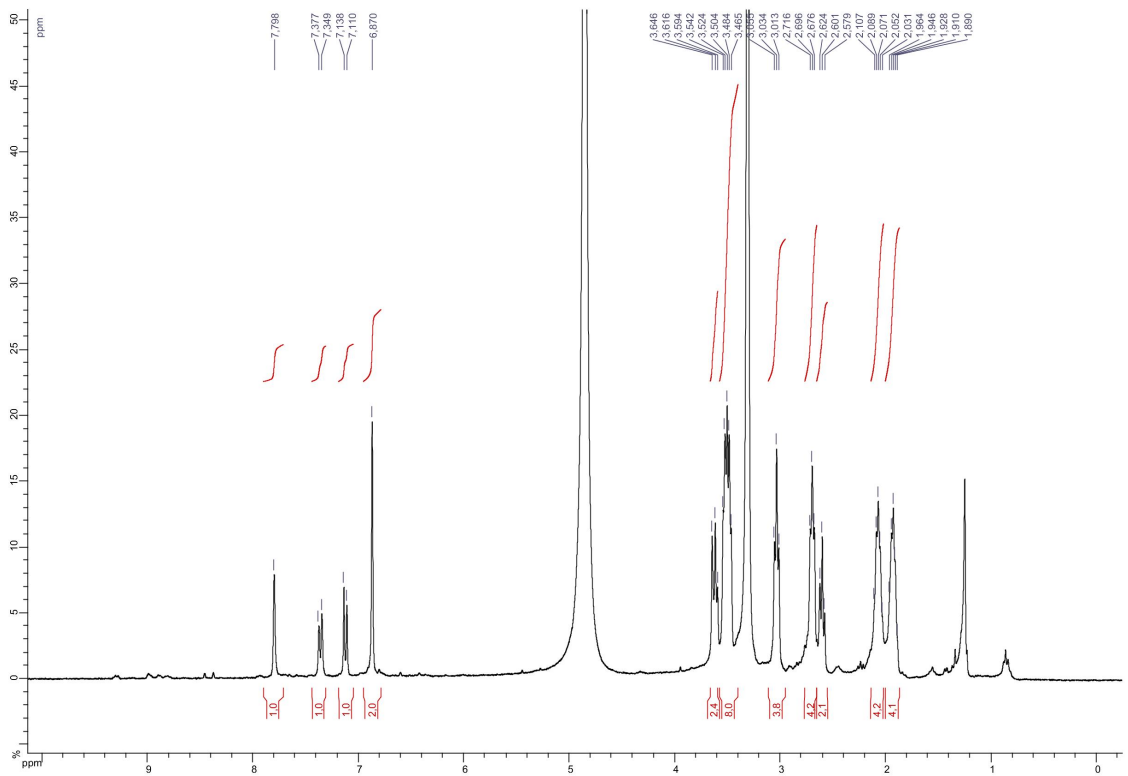

<sup>1</sup>H NMR spectrum of **9b** (CD<sub>3</sub>OD, 300 MHz)

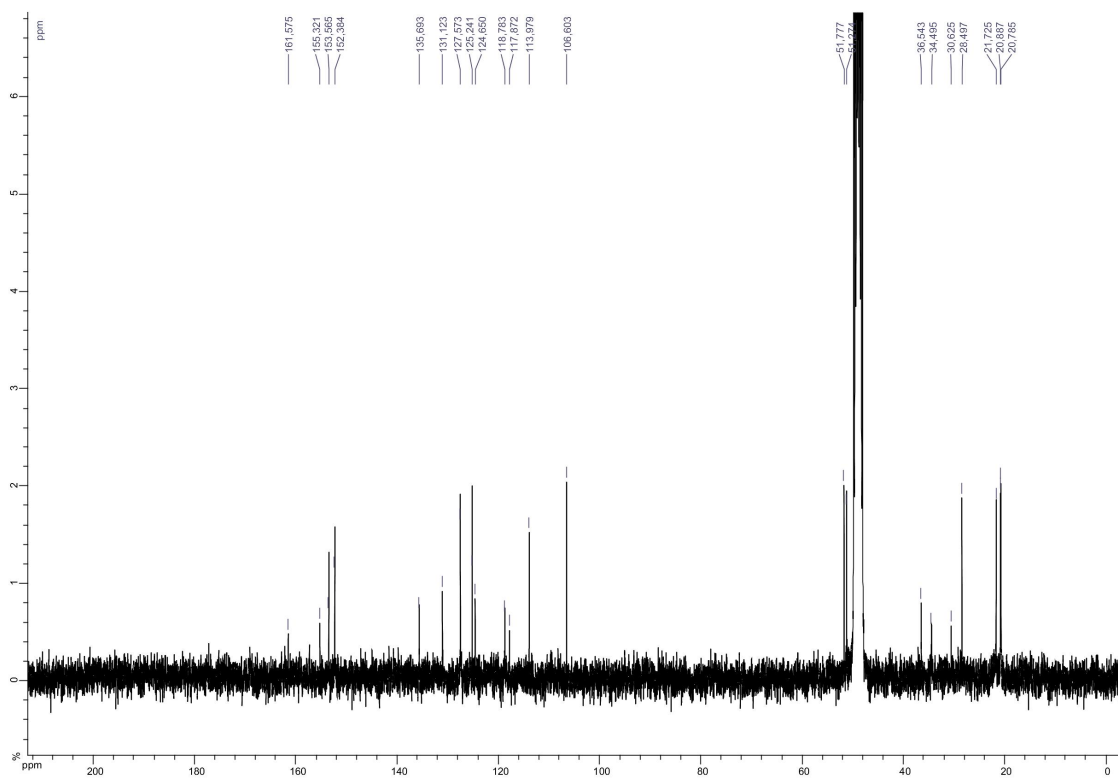

$^{13}\text{C}$  NMR spectrum of **9b** ( $\text{CD}_3\text{OD}$ , 75 MHz)

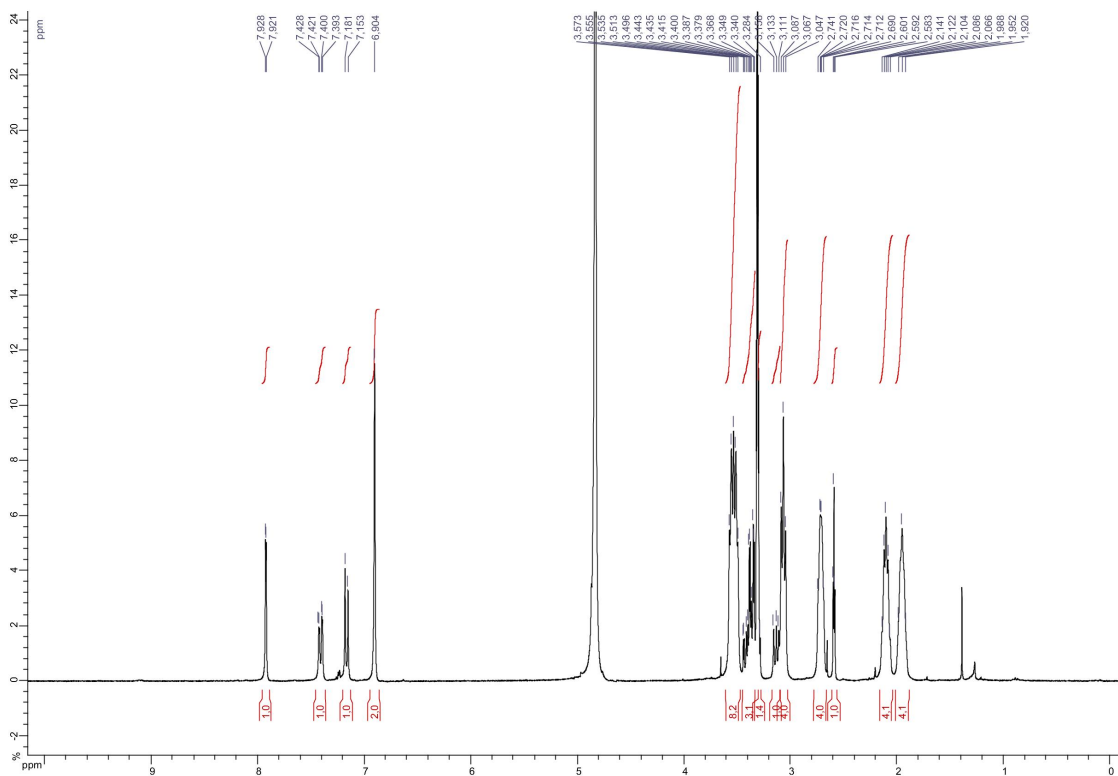

$^1\text{H}$  NMR spectrum of **10b** ( $\text{CD}_3\text{OD}$ , 300 MHz)

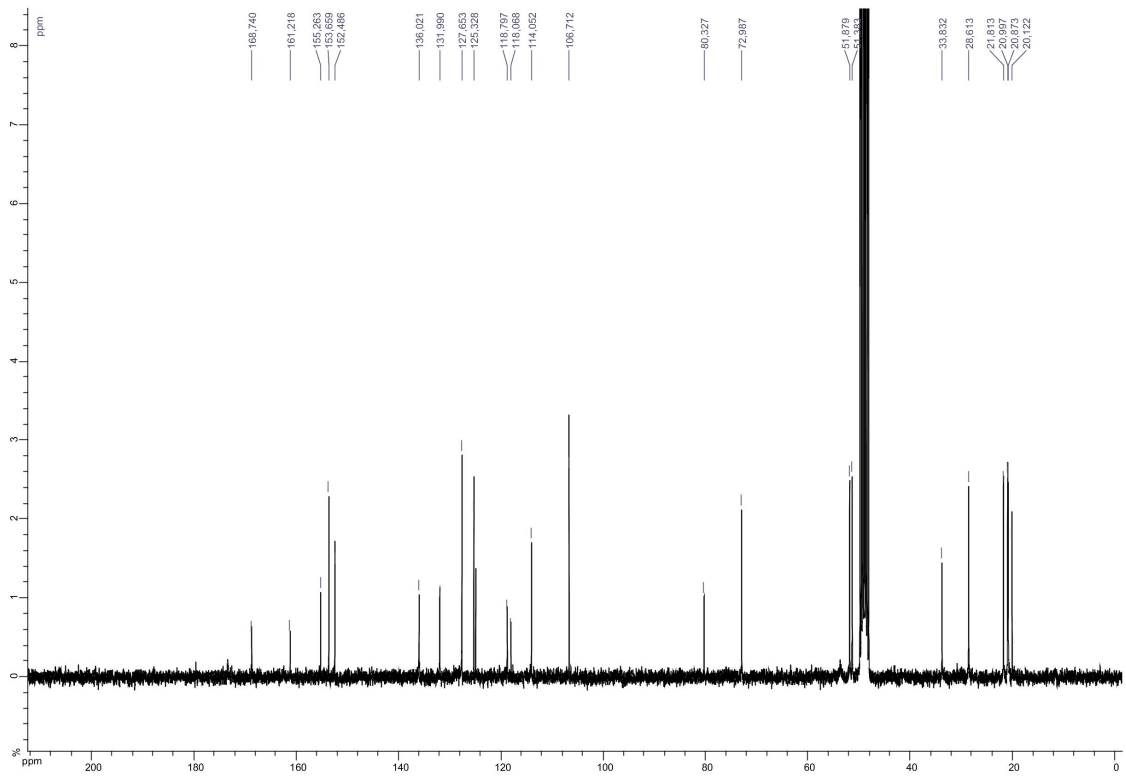

<sup>13</sup>C NMR spectrum of **10b** (CD<sub>3</sub>OD, 75 MHz)

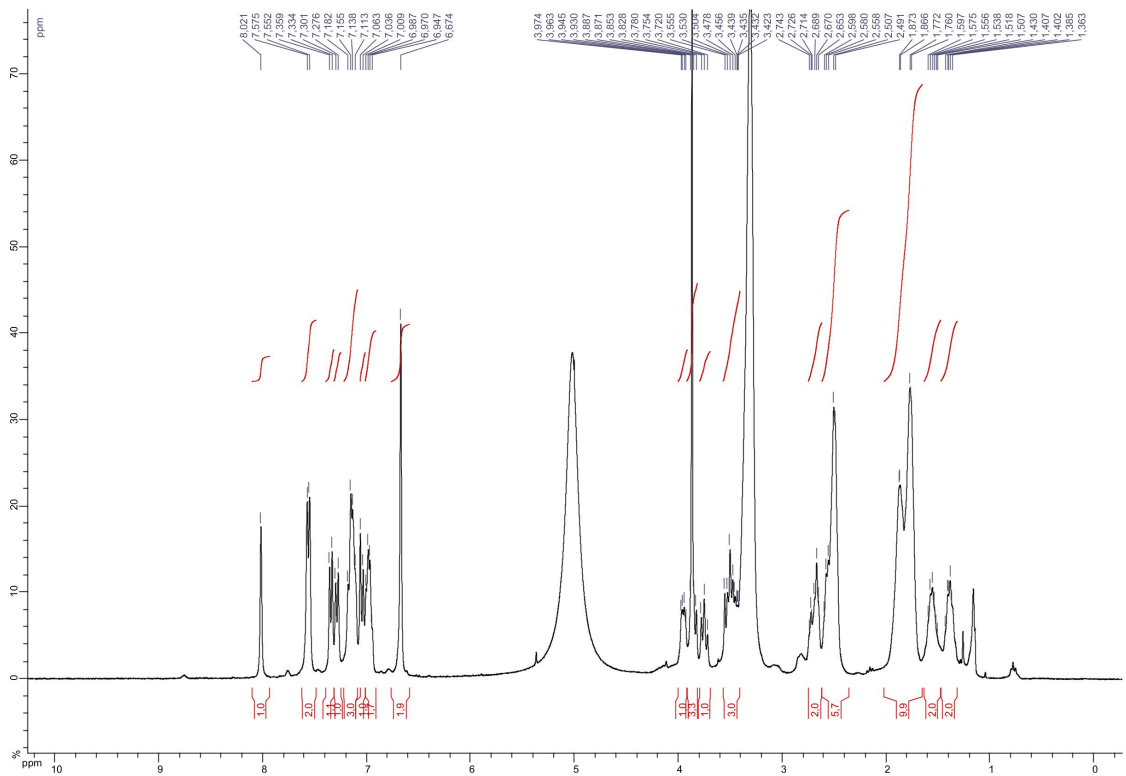

<sup>1</sup>H NMR spectrum of **11b** (CD<sub>3</sub>OD, 300 MHz)

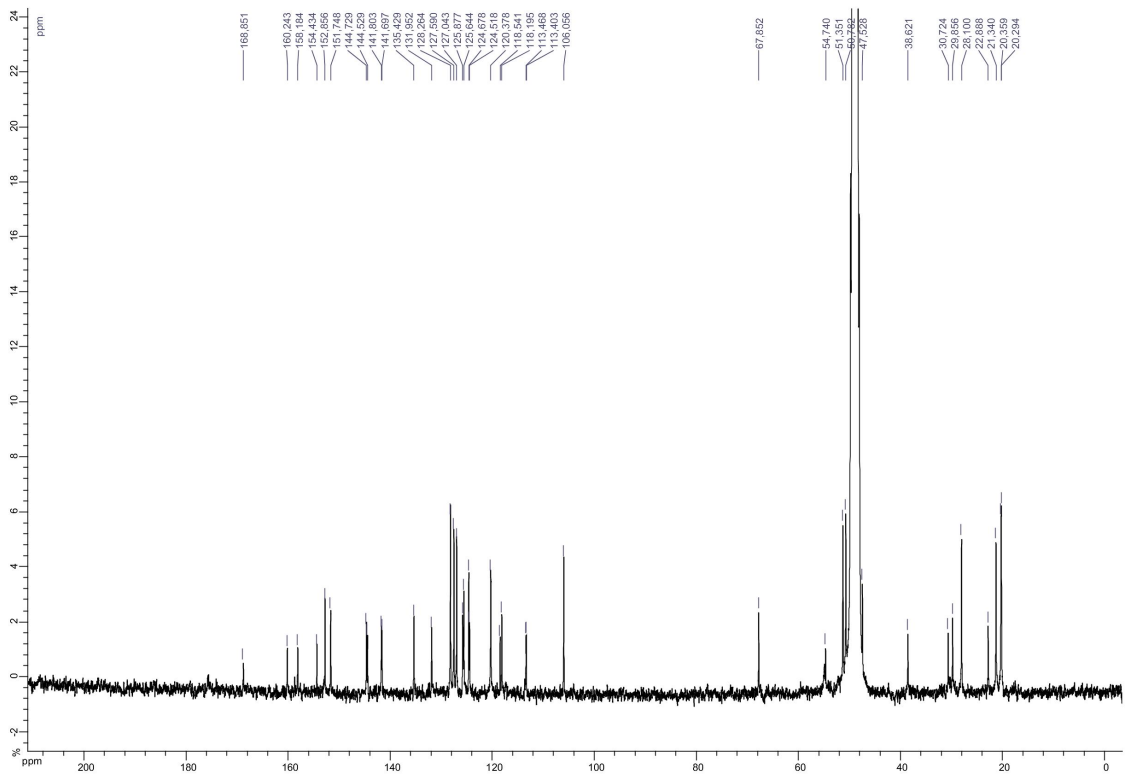

<sup>13</sup>C NMR spectrum of **11b** (CD<sub>3</sub>OD, 75 MHz)

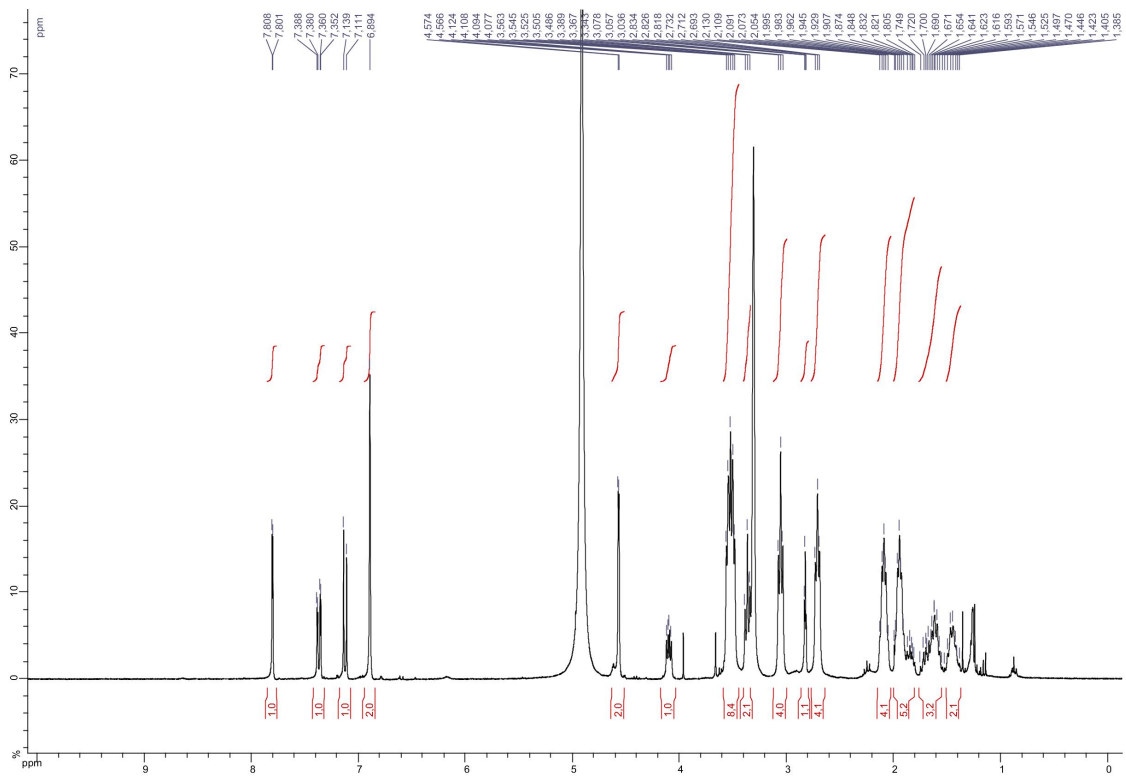

<sup>1</sup>H NMR spectrum of **12b** (CD<sub>3</sub>OD, 300 MHz)

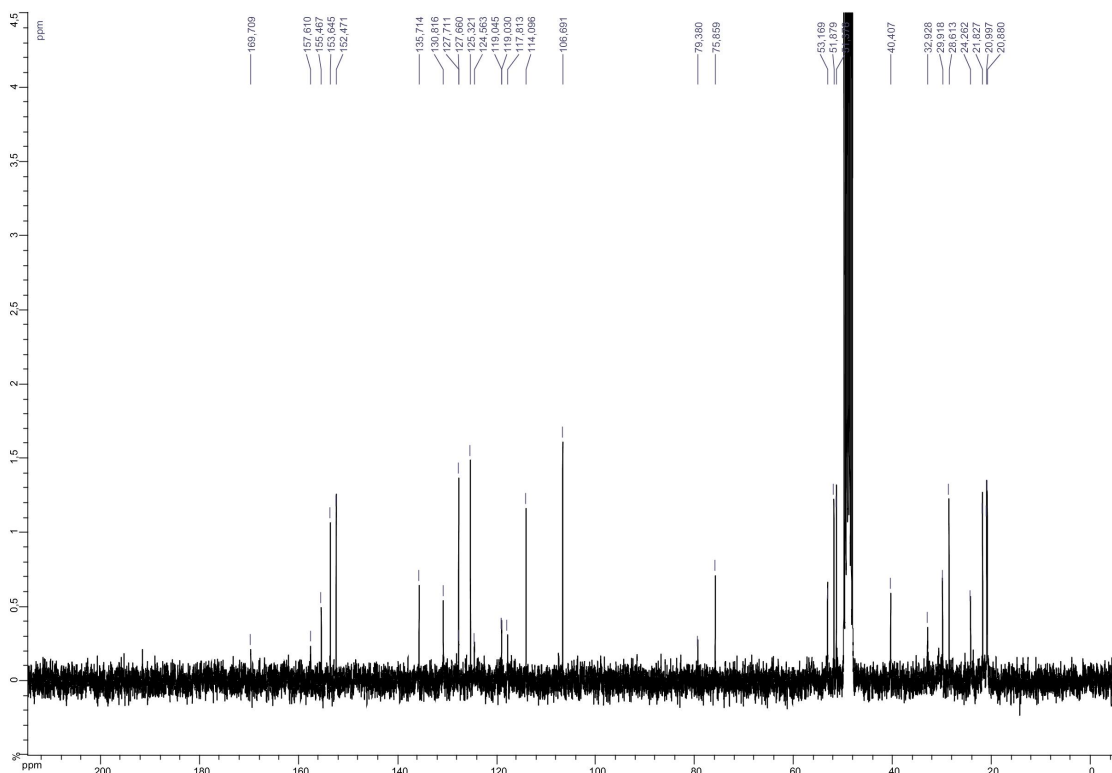

$^{13}\text{C}$  NMR spectrum of **12b** ( $\text{CD}_3\text{OD}$ , 75 MHz)

## HRMS spectra of functionalisable H-Rubies and their intermediates

C:\Xcalibur\data\Analyses\H-00318  
MeCN

11/25/2014 3:59:21 PM

DESPRAS Guillaume GD1-29

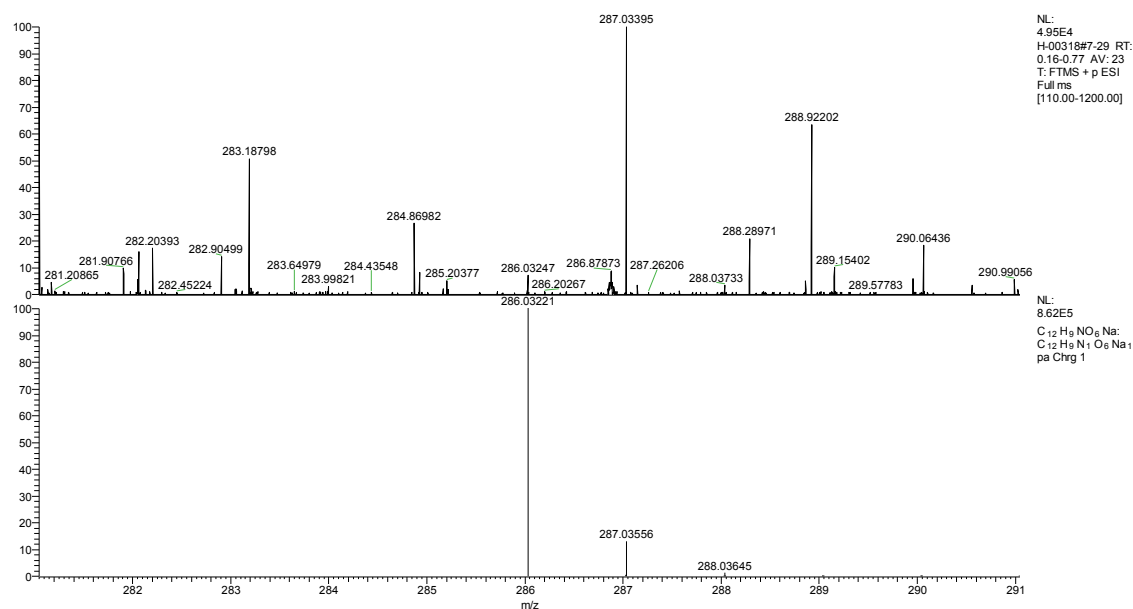

HRMS spectrum of **1**

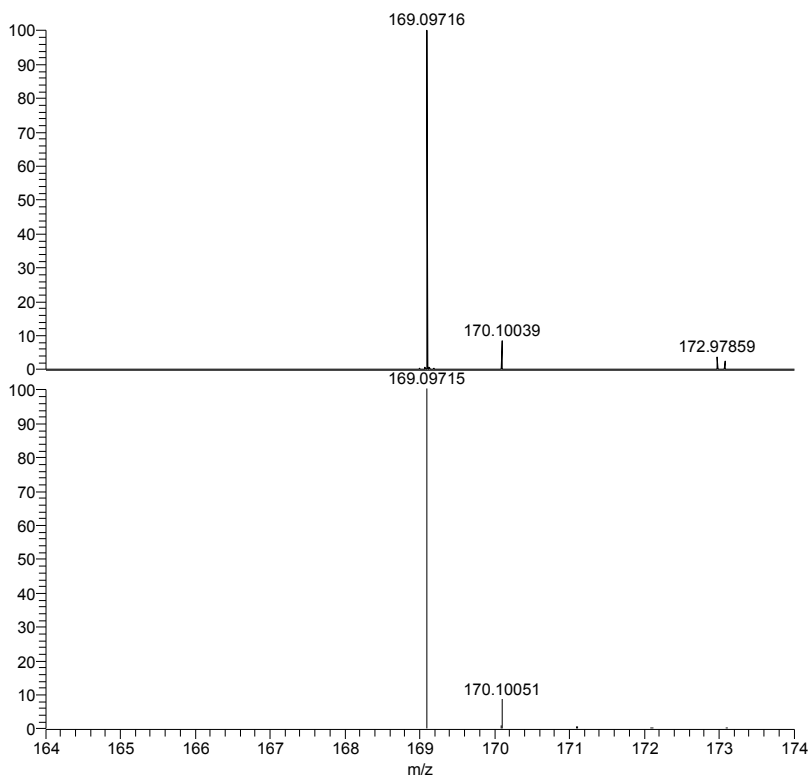

NL:  
7.31E7  
H-00326#7-29 RT:  
0.16-0.77 AV: 23  
T: FTMS + p ESI  
Full ms  
[110.00-1000.00]

NL:  
9.05E5  
C<sub>8</sub> H<sub>13</sub> N<sub>2</sub> O<sub>2</sub>:  
C<sub>8</sub> H<sub>13</sub> N<sub>2</sub> O<sub>2</sub>  
pa Chrg 1

### HRMS spectrum of 4-((prop-2-yn-1-yloxy)carbonyl)piperazin-1-ium

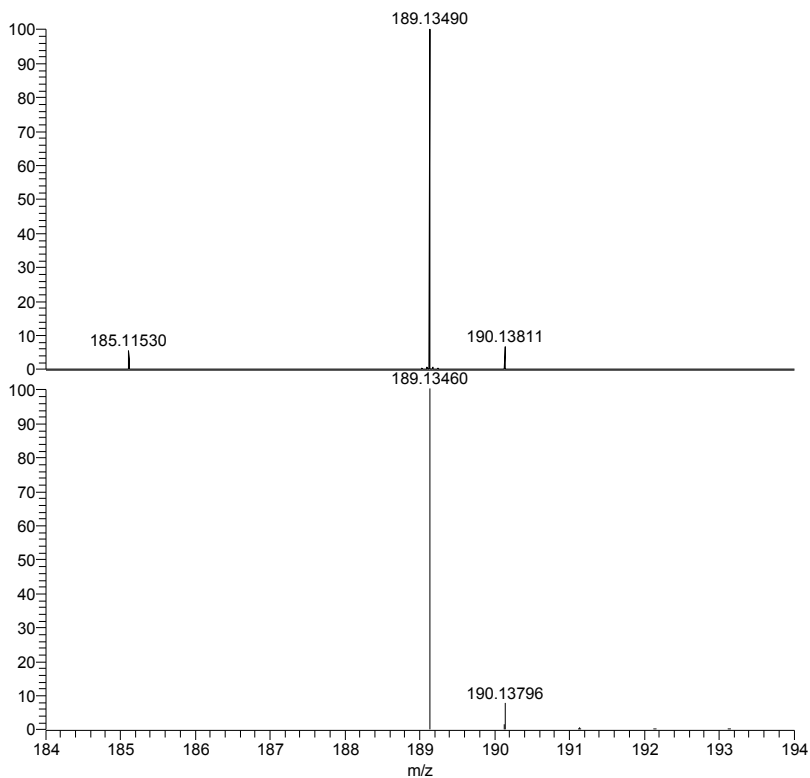

NL:  
5.94E7  
H-00321#21-25  
RT: 0.55-0.66 AV:  
5 T: FTMS + p ESI  
Full ms  
[110.00-1000.00]

NL:  
9.08E5  
C<sub>7</sub> H<sub>16</sub> N<sub>4</sub> O<sub>2</sub> H:  
C<sub>7</sub> H<sub>17</sub> N<sub>4</sub> O<sub>2</sub>  
pa Chrg 1

### HRMS spectrum of 2-(2-(2-azidoethoxy)ethoxy)-N-methylethanamine



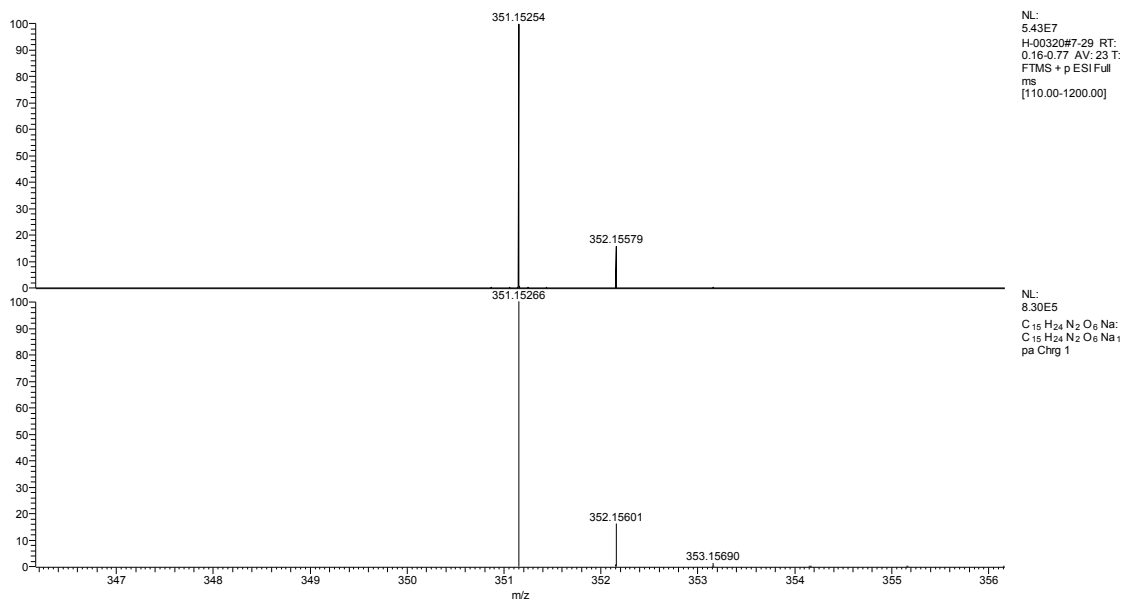

### HRMS spectrum of 6-((tert-butoxycarbonyl)amino)-2-(((prop-2-yn-1-yloxy)carbonyl)amino)hexanoic acid

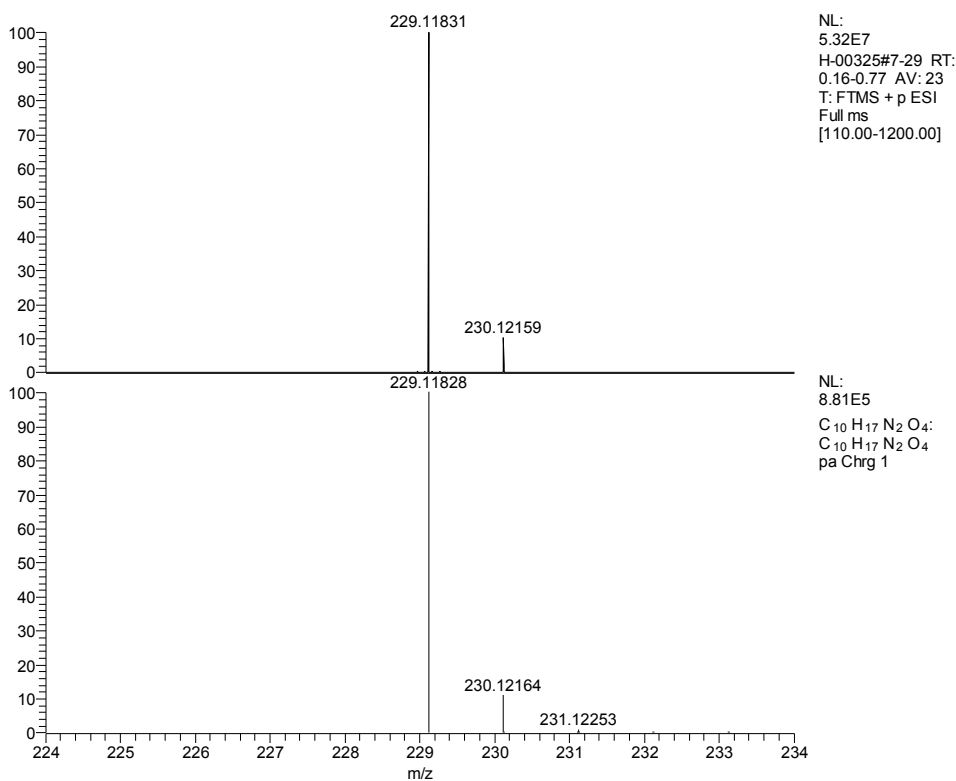

### HRMS spectrum of 5-carboxy-5-(((prop-2-yn-1-yloxy)carbonyl)amino)pentan-1-aminium

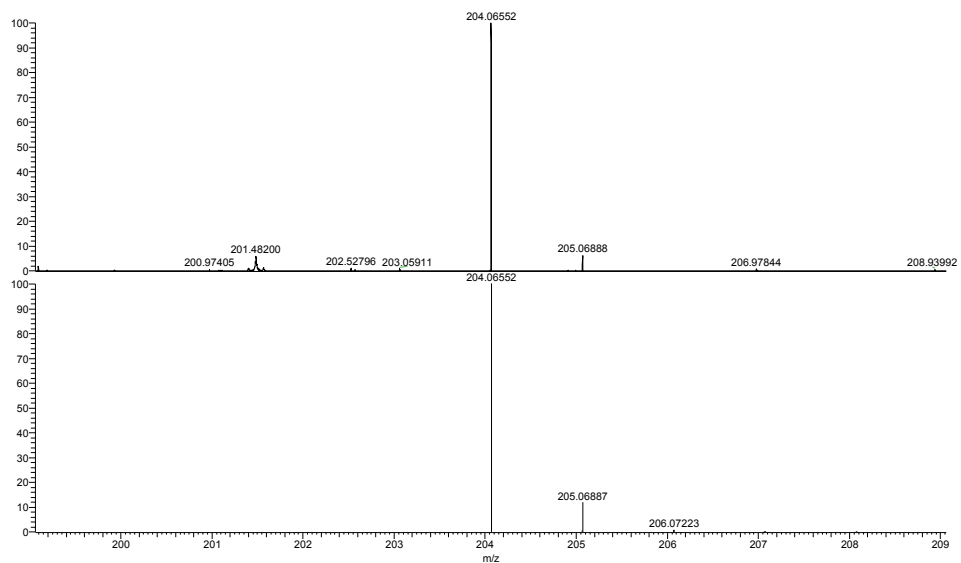

NL:  
1.15E6  
H-00317#7-29 RT:  
0.16-0.77 AV: 23  
T: FTMS + p ESI  
Full.ms  
[110.00-1200.00]

NL:  
8.78E5  
C<sub>11</sub>H<sub>9</sub>NO<sub>3</sub>H  
C<sub>11</sub>H<sub>10</sub>N<sub>1</sub>O<sub>3</sub>  
pa Chrg 1

HRMS spectrum of 2a

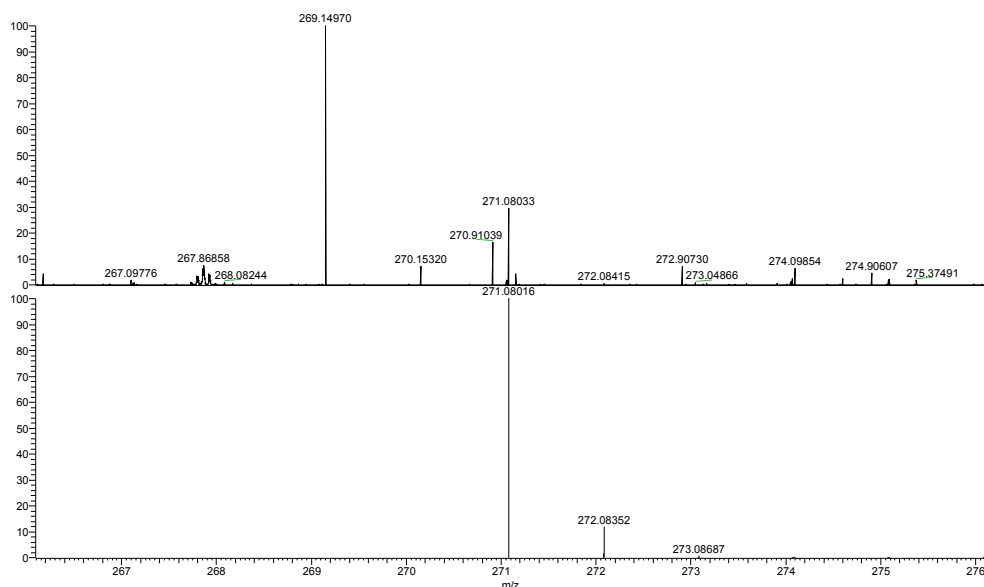

NL:  
7.60E5  
H-00386#7-29 RT:  
0.15-0.76 AV: 23 T:  
FTMS + p ESI Full  
ms  
[110.00-1200.00]

NL:  
8.68E5  
C<sub>11</sub>H<sub>12</sub>N<sub>4</sub>O<sub>3</sub>Na  
C<sub>11</sub>H<sub>12</sub>N<sub>4</sub>O<sub>3</sub>Na<sub>1</sub>  
pa Chrg 1

HRMS spectrum of 2b

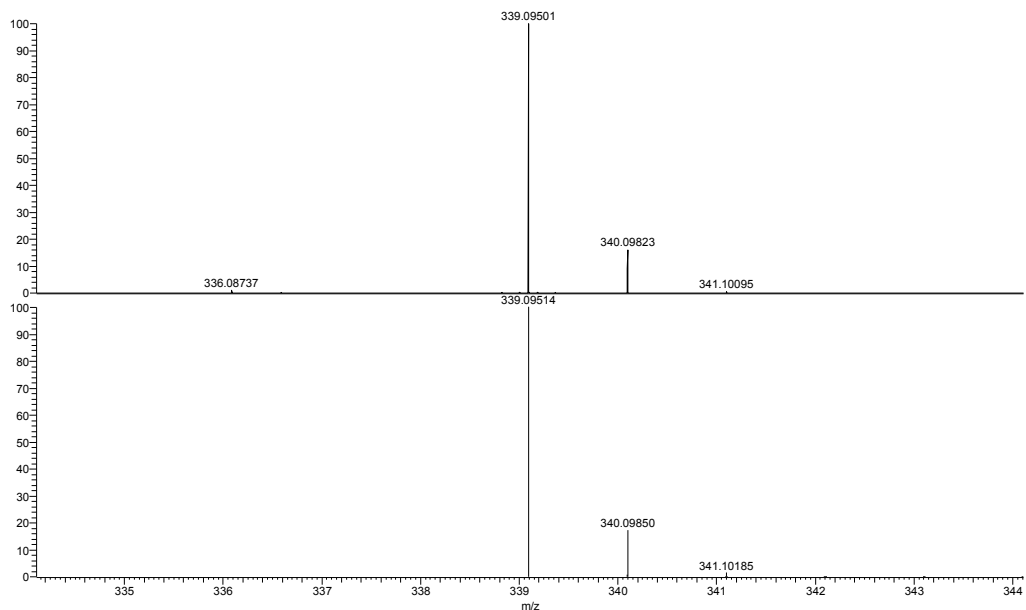

NL:  
3.98E7  
H-00323#7-29 RT:  
0.16-0.77 AV: 23 T:  
FTMS + p ESI Full  
ms  
[110.00-1200.00]

NL:  
8.24E5  
C<sub>16</sub>H<sub>16</sub>N<sub>2</sub>O<sub>5</sub>Na:  
C<sub>16</sub>H<sub>16</sub>N<sub>2</sub>O<sub>5</sub>Na:  
pa Chrg 1

HRMS spectrum of 2d

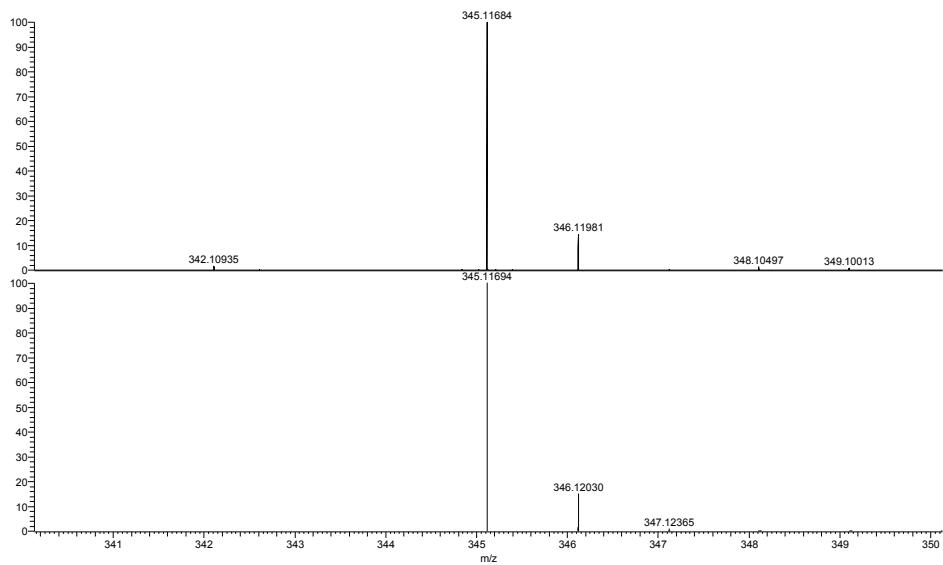

NL:  
6.22E7  
H-00324#7-29 RT:  
0.16-0.77 AV: 23 T:  
FTMS + p ESI Full  
ms  
[110.00-1200.00]

NL:  
8.36E5  
C<sub>14</sub>H<sub>16</sub>N<sub>4</sub>O<sub>5</sub>Na:  
C<sub>14</sub>H<sub>16</sub>N<sub>4</sub>O<sub>5</sub>Na:  
pa Chrg 1

HRMS spectrum of 2e

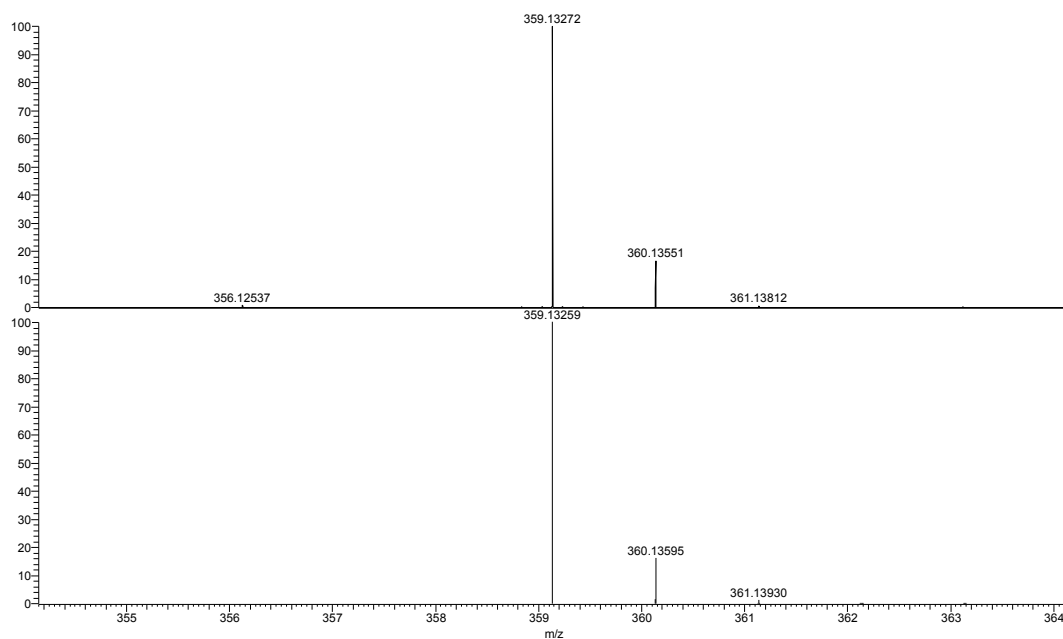

NL:  
9.83E7  
H-00322#7-29 RT:  
0.16-0.77 AV: 23 T:  
FTMS + p ESI Full  
ms  
[110.00-1200.00]

NL:  
8.26E5  
C<sub>15</sub>H<sub>20</sub>N<sub>4</sub>O<sub>5</sub>Na:  
C<sub>15</sub>H<sub>20</sub>N<sub>4</sub>O<sub>5</sub>Na:  
pa Chrg 1

HRMS spectrum of 2f

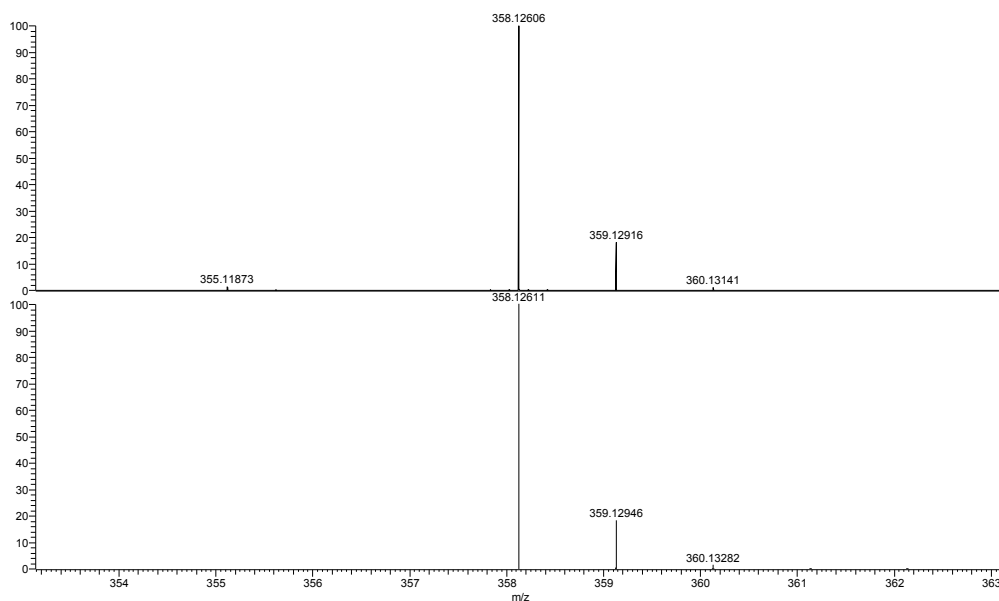

NL:  
1.58E8  
H-00319#7-29 RT:  
0.16-0.77 AV: 23 T:  
FTMS + p ESI Full  
ms  
[110.00-1200.00]

NL:  
8.16E5  
C<sub>17</sub>H<sub>21</sub>NO<sub>5</sub>Na:  
C<sub>17</sub>H<sub>21</sub>N<sub>1</sub>O<sub>5</sub>Na:  
pa Chrg 1

HRMS spectrum of 2g

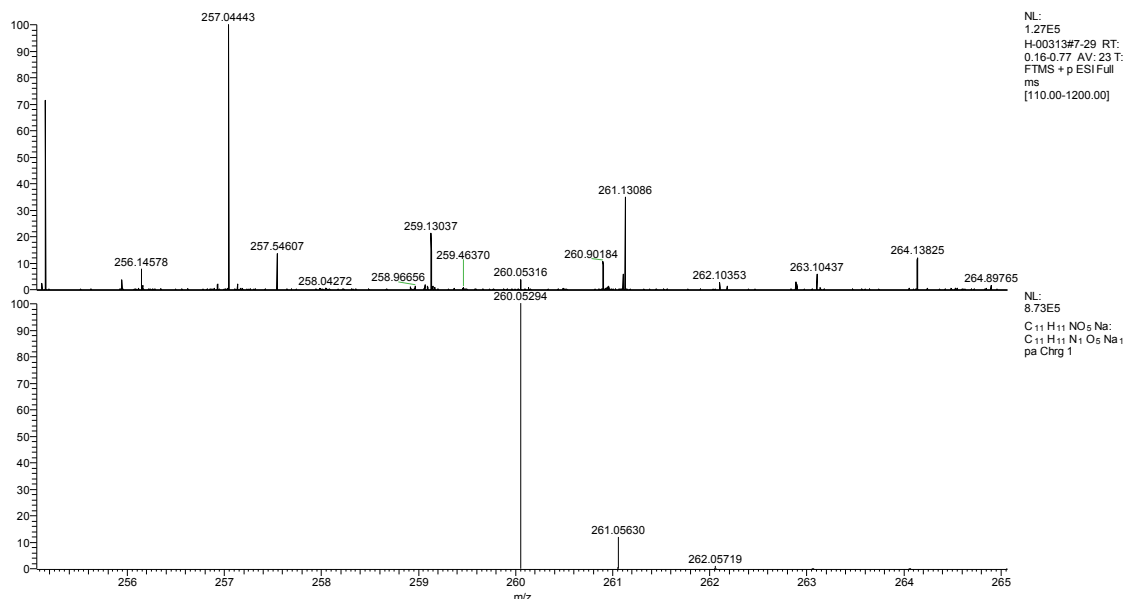

HRMS spectrum of **2h**

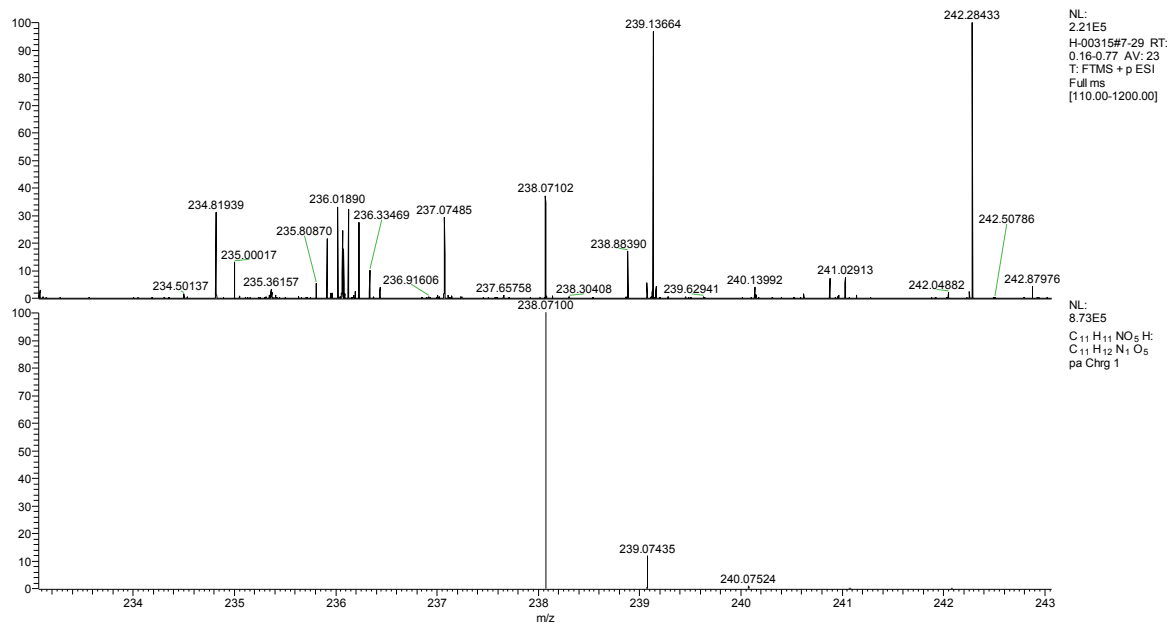

HRMS spectrum of **2i**

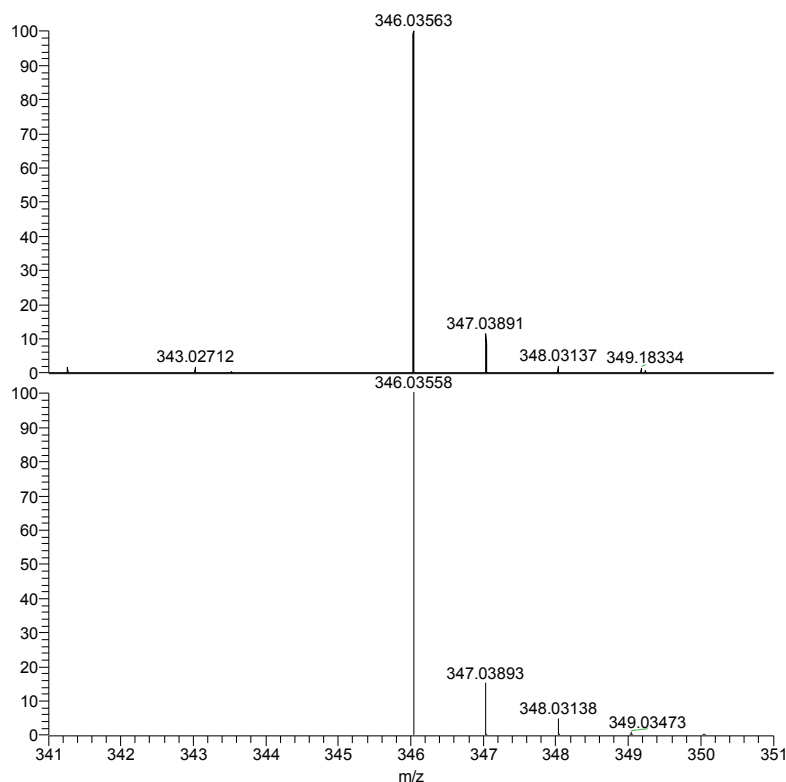

NL:  
1.85E6  
H-00314b#14-21 RT:  
0.35-0.55 AV: 8 T:  
FTMS + p ESI Full ms  
[110.00-1200.00]

NL:  
8.01E5  
C<sub>14</sub>H<sub>13</sub>NO<sub>6</sub>SNa:  
C<sub>14</sub>H<sub>13</sub>N<sub>1</sub>O<sub>6</sub>S<sub>1</sub>Na<sub>1</sub>  
pa Chrg 1

HRMS spectrum of 2j (sulfoxyde)

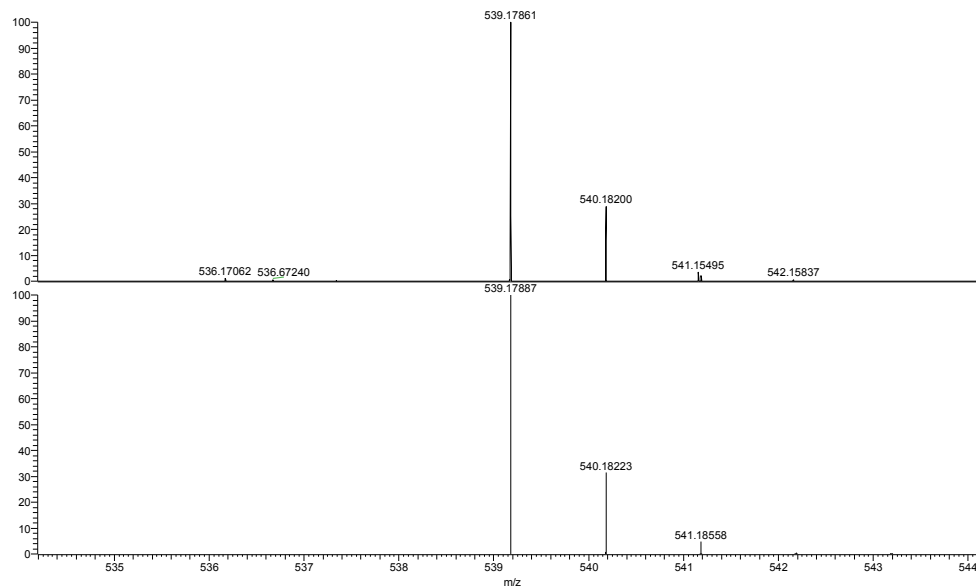

NL:  
3.05E6  
H-00384#7-29 RT:  
0.16-0.77 AV: 23 T:  
FTMS + p ESI Full  
ms  
[110.00-1500.00]

NL:  
7.12E5  
C<sub>29</sub>H<sub>28</sub>N<sub>2</sub>O<sub>7</sub>Na:  
C<sub>29</sub>H<sub>28</sub>N<sub>2</sub>O<sub>7</sub>Na<sub>1</sub>  
pa Chrg 1

HRMS spectrum of 2k

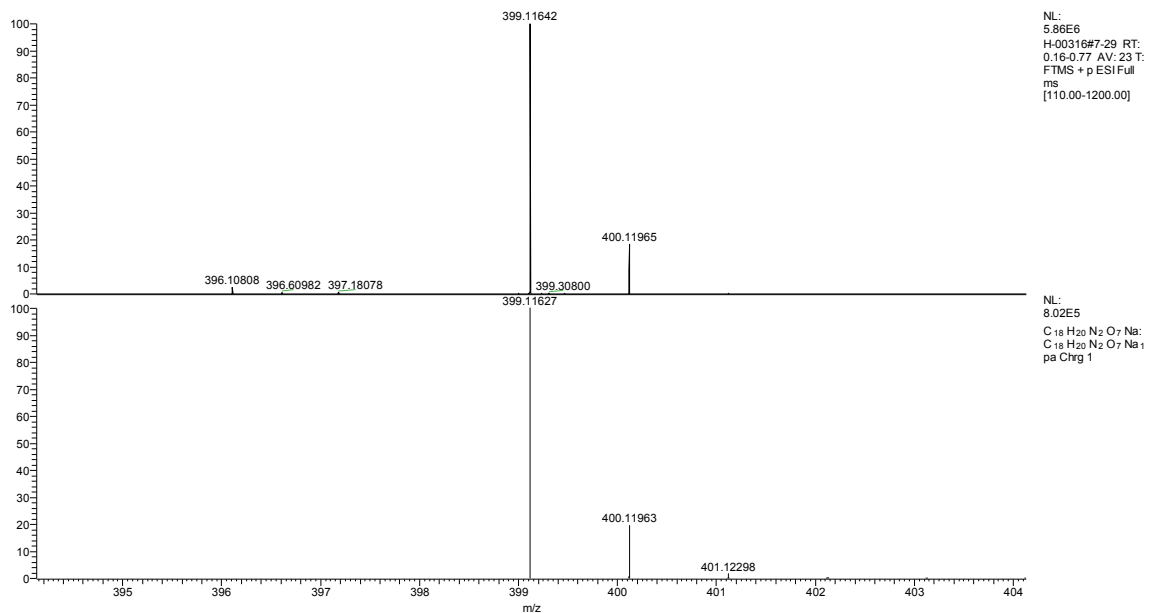

HRMS spectrum of **2I**

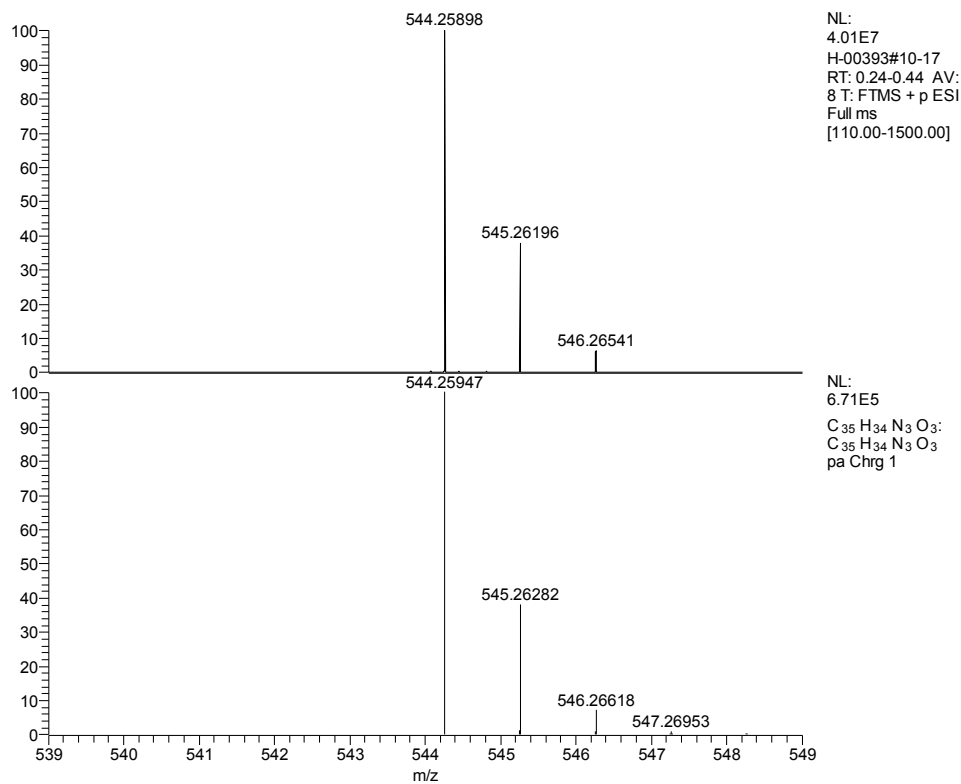

HRMS spectrum of **HR-A**

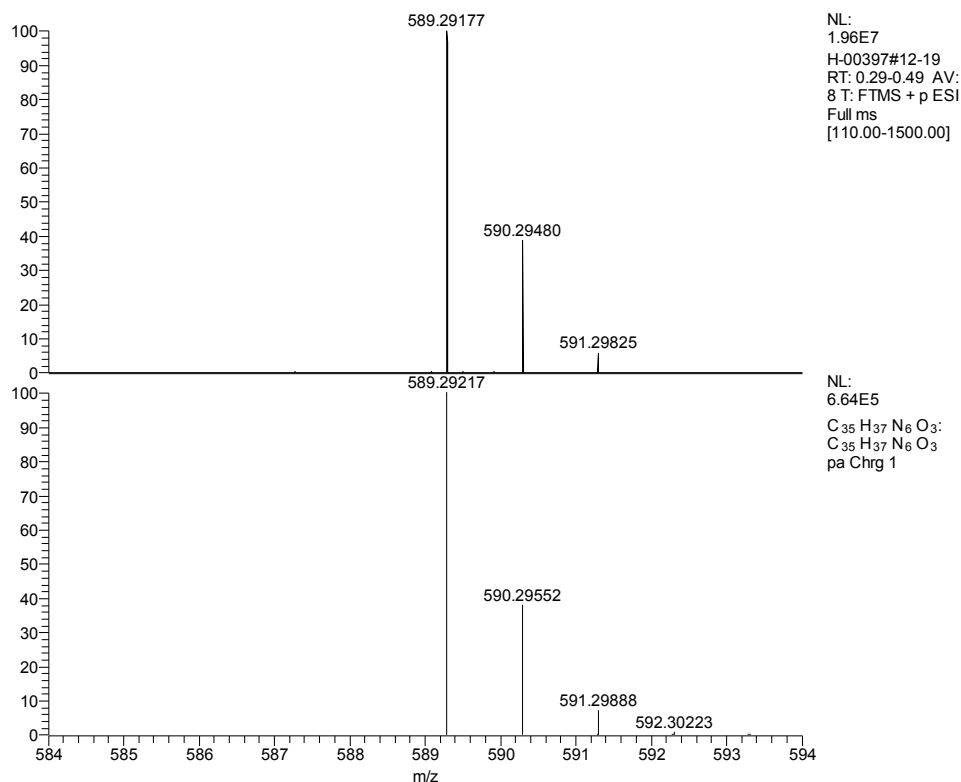

HRMS spectrum of HR-N3

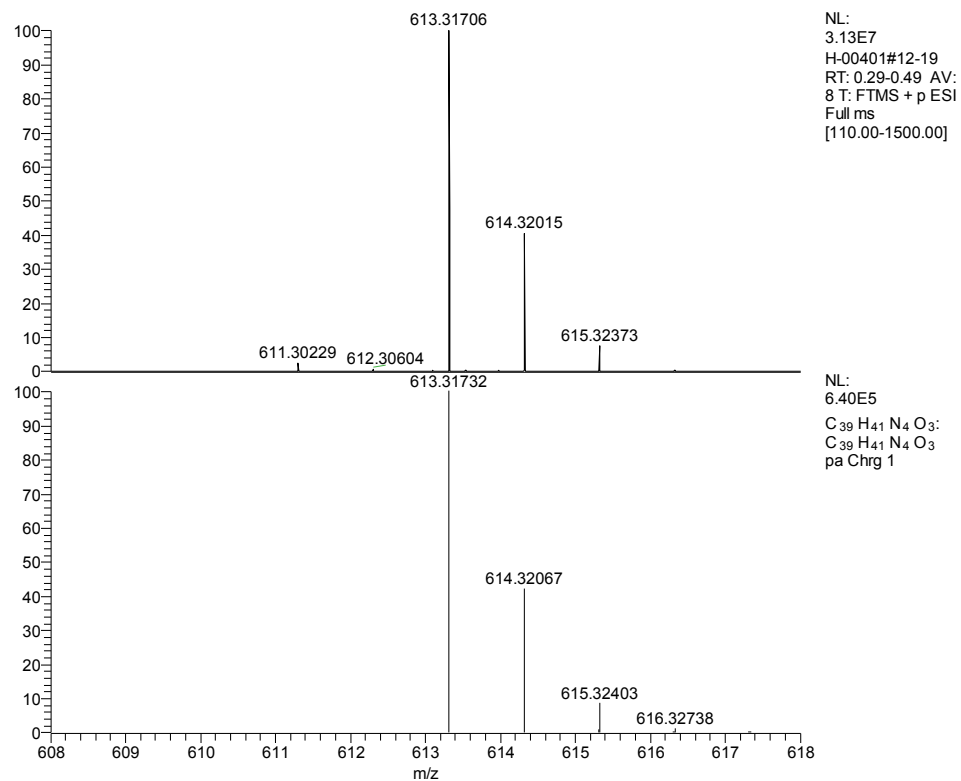

HRMS spectrum of HR-PiA



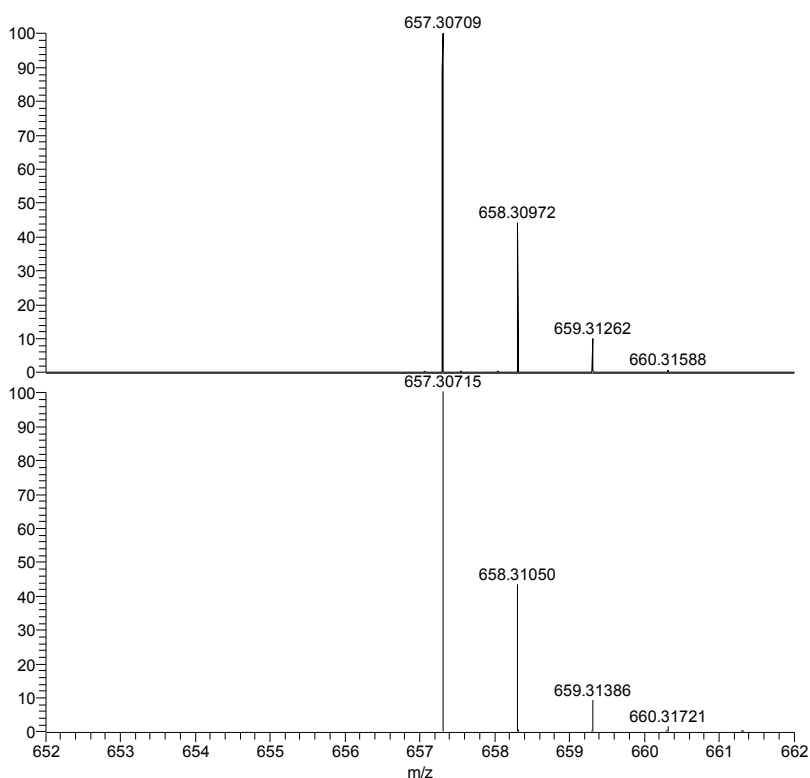

NL:  
7.19E7  
H-00334#7-29 RT:  
0.16-0.77 AV: 23  
T: FTMS + p ESI  
Full ms  
[110.00-1500.00]

NL:  
6.30E5  
C<sub>40</sub> H<sub>41</sub> N<sub>4</sub> O<sub>5</sub>:  
C<sub>40</sub> H<sub>41</sub> N<sub>4</sub> O<sub>5</sub>  
pa Chrg 1

HRMS spectrum of HR-PiAC

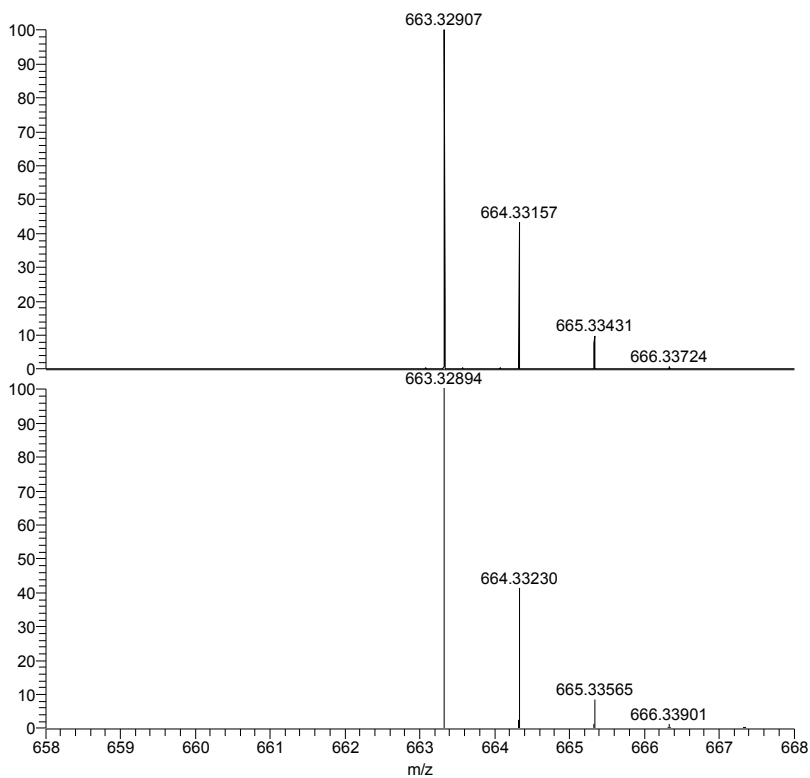

NL:  
1.37E8  
H-00333#7-29 RT:  
0.16-0.77 AV: 23  
T: FTMS + p ESI  
Full ms  
[110.00-1500.00]

NL:  
6.39E5  
C<sub>38</sub> H<sub>43</sub> N<sub>6</sub> O<sub>5</sub>:  
C<sub>38</sub> H<sub>43</sub> N<sub>6</sub> O<sub>5</sub>  
pa Chrg 1

HRMS spectrum of HR-PN<sub>3</sub>

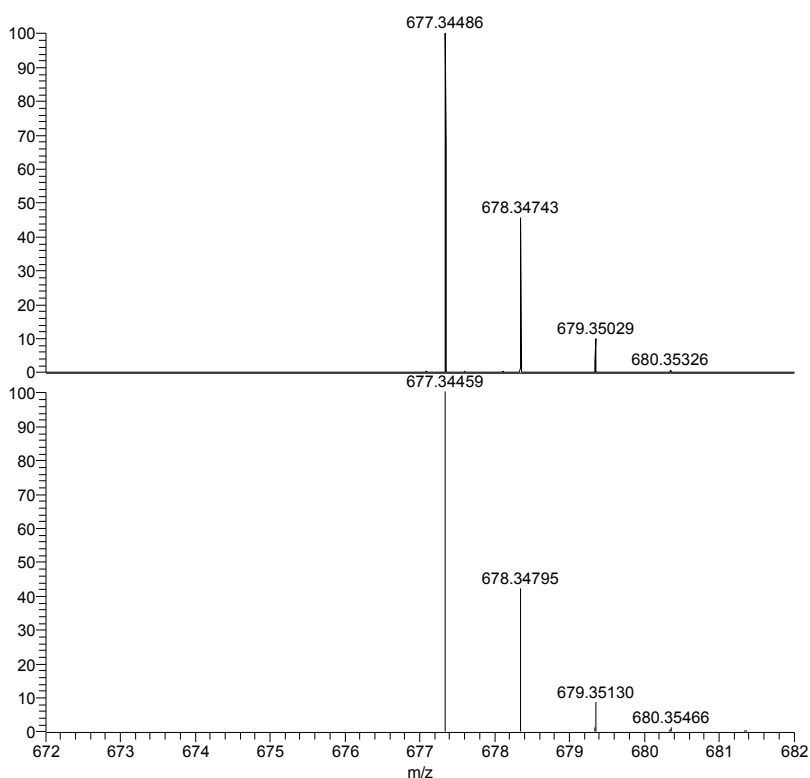

NL:  
1.13E8  
H-00331#7-29 RT:  
0.16-0.77 AV: 23  
T: FTMS + p ESI  
Full ms  
[110.00-1500.00]

NL:  
6.32E5  
C<sub>39</sub> H<sub>45</sub> N<sub>6</sub> O<sub>5</sub>:  
C<sub>39</sub> H<sub>45</sub> N<sub>6</sub> O<sub>5</sub>  
pa Chrg 1

HRMS spectrum of **HR-MPN<sub>3</sub>**

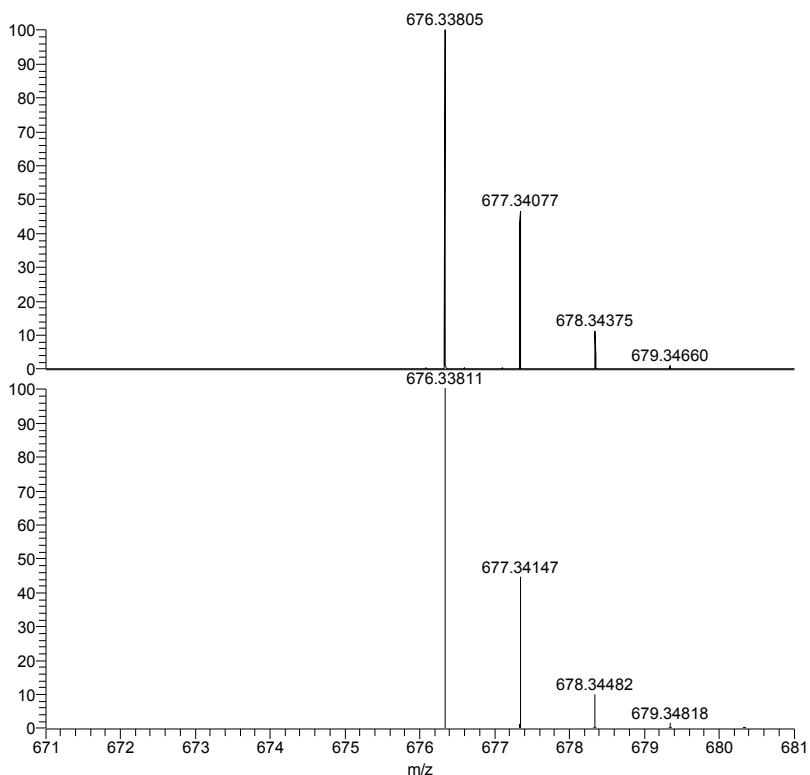

NL:  
1.85E8  
H-00329#7-29 RT:  
0.16-0.77 AV: 23  
T: FTMS + p ESI  
Full ms  
[110.00-1500.00]

NL:  
6.24E5  
C<sub>41</sub> H<sub>46</sub> N<sub>3</sub> O<sub>6</sub>:  
C<sub>41</sub> H<sub>46</sub> N<sub>3</sub> O<sub>6</sub>  
pa Chrg 1

HRMS spectrum of **HR-PA**

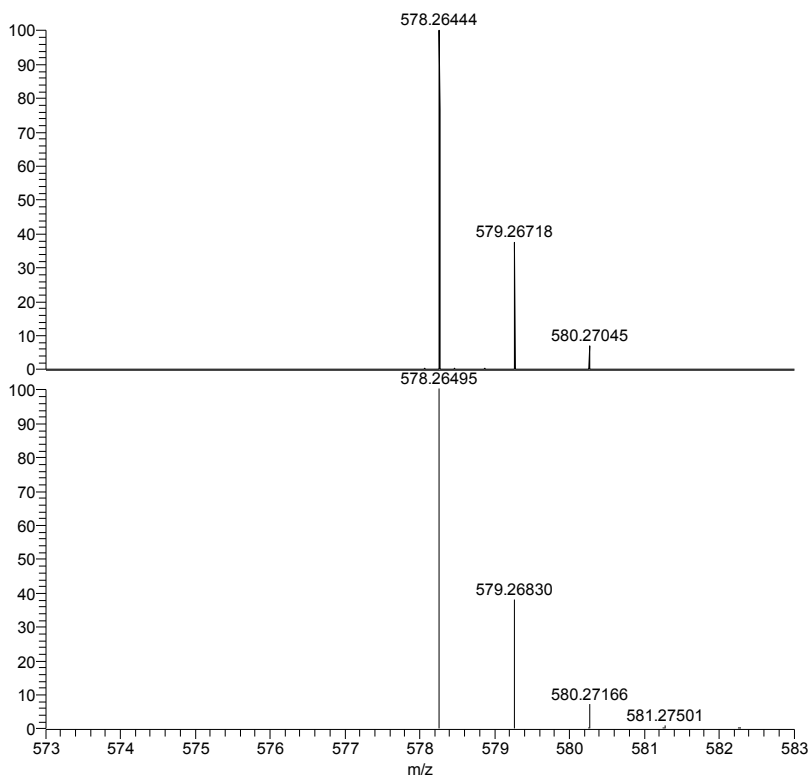

NL:  
8.54E7  
H-00328#7-29 RT:  
0.16-0.77 AV: 23  
T: FTMS + p ESI  
Full ms  
[110.00-1500.00]

NL:  
6.68E5  
C<sub>35</sub> H<sub>36</sub> N<sub>3</sub> O<sub>5</sub>:  
C<sub>35</sub> H<sub>36</sub> N<sub>3</sub> O<sub>5</sub>:  
pa Chrg 1

HRMS spectrum of HR-Ala

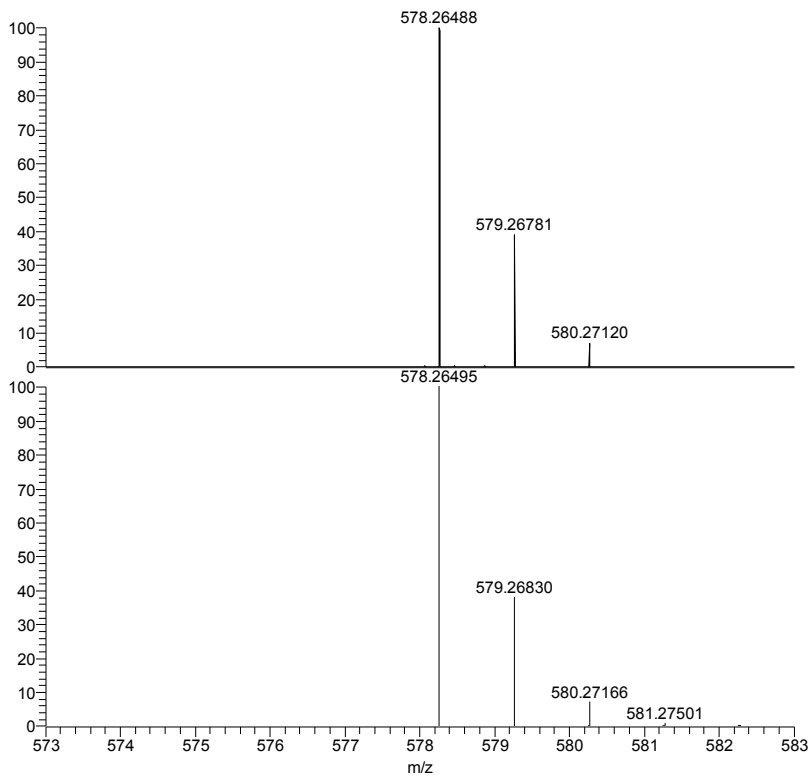

NL:  
5.24E7  
H-00332#7-29 RT:  
0.16-0.77 AV: 23  
T: FTMS + p ESI  
Full ms  
[110.00-1500.00]

NL:  
6.68E5  
C<sub>35</sub> H<sub>36</sub> N<sub>3</sub> O<sub>5</sub>:  
C<sub>35</sub> H<sub>36</sub> N<sub>3</sub> O<sub>5</sub>:  
pa Chrg 1

HRMS spectrum of HR-βAla

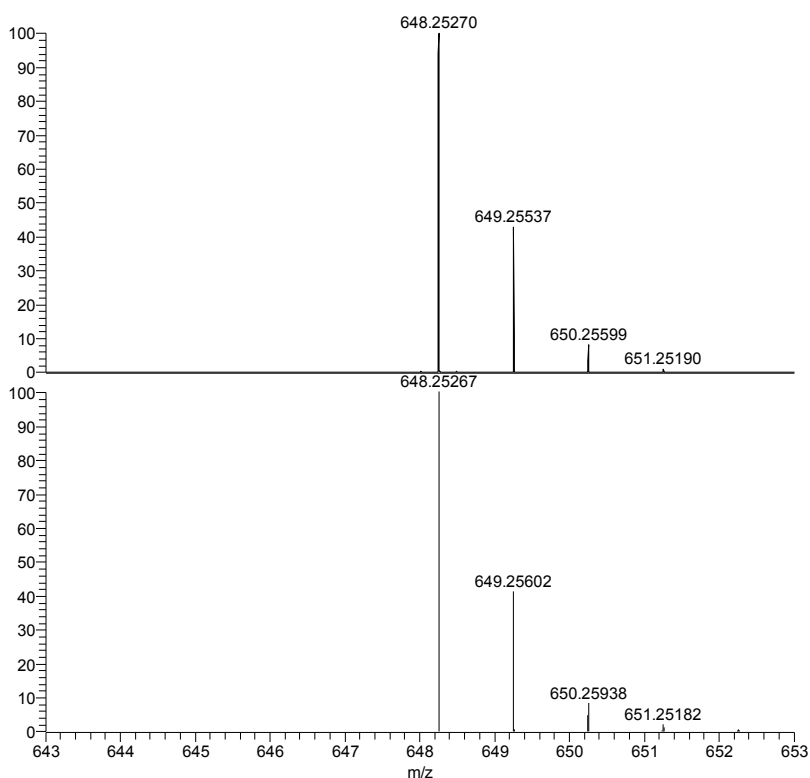

NL:  
5.95E7  
H-00327#7-29 RT:  
0.16-0.77 AV: 23  
T: FTMS + p ESI  
Full ms  
[110.00-1500.00]

NL:  
6.14E5  
C<sub>38</sub> H<sub>38</sub> N<sub>3</sub> O<sub>5</sub> S:  
C<sub>38</sub> H<sub>38</sub> N<sub>3</sub> O<sub>5</sub> S<sub>1</sub>  
pa Chrg 1

HRMS spectrum of HR-CysA

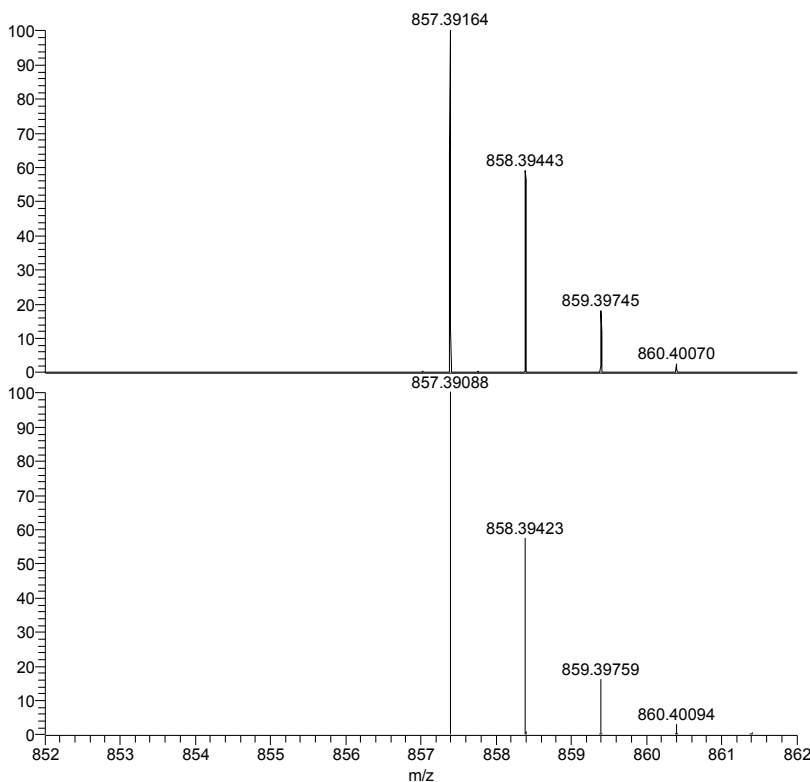

NL:  
6.05E7  
H-00403#11-19  
RT: 0.27-0.49 AV:  
9 T: FTMS + p ESI  
Full ms  
[110.00-1500.00]

NL:  
5.44E5  
C<sub>53</sub> H<sub>53</sub> N<sub>4</sub> O<sub>7</sub>:  
C<sub>53</sub> H<sub>53</sub> N<sub>4</sub> O<sub>7</sub>  
pa Chrg 1

HRMS spectrum of HR-LysF

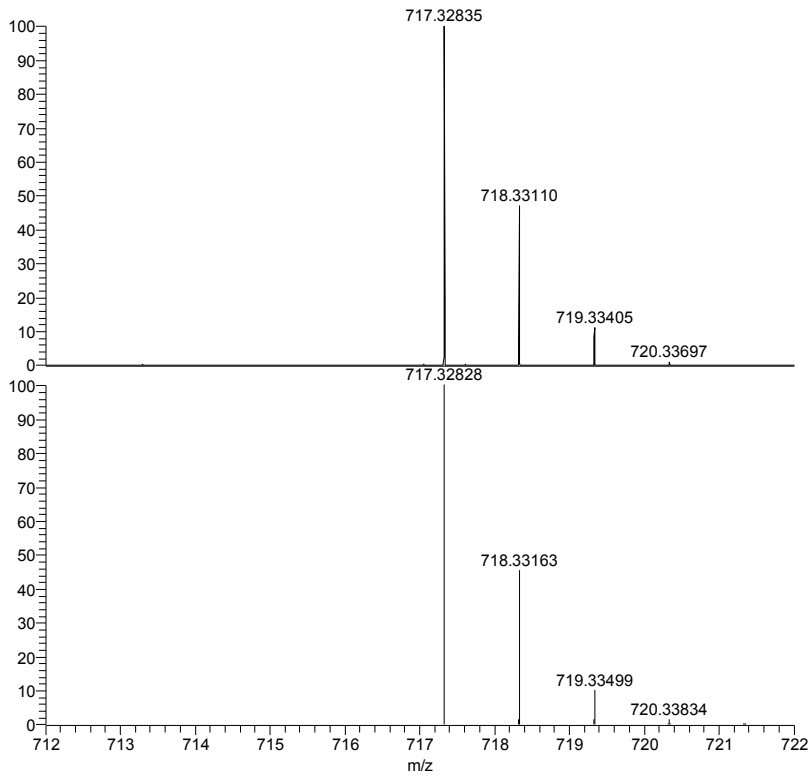

NL:  
5.87E7  
H-00330#7-29 RT:  
0.16-0.77 AV: 23  
T: FTMS + p ESI  
Full ms  
[110.00-1500.00]

NL:  
6.13E5  
C<sub>42</sub> H<sub>45</sub> N<sub>4</sub> O<sub>7</sub>:  
C<sub>42</sub> H<sub>45</sub> N<sub>4</sub> O<sub>7</sub>  
pa Chrg 1

HRMS spectrum of HR-LysA
